# Supplementary material for: Therapeutic targets and signaling pathways of active components of QiLing decoction against castration-resistant prostate cancer based on network pharmacology
Source: PeerJ. 2022 Jun 27;10:e13481. doi: 10.7717/peerj.13481 (PMC9245566; doi:10.7717/peerj.13481)
Supplement: Supplemental Information 1 — The components of QLD (baimaoteng, huangqi, jianghuang, shegan, shudihuang, yimucao) and their potential targets were listed. [file peerj-10-13481-s001.xlsx]

## Sheet: allTargets
Drug	MolId	MolName	Target
baimaoteng	MOL006859	Volon	Mineralocorticoid receptor
huangqi	MOL000211	Mairin	Progesterone receptor
huangqi	MOL000239	Jaranol	Nitric oxide synthase, inducible
huangqi	MOL000239	Jaranol	Prostaglandin G/H synthase 1
huangqi	MOL000239	Jaranol	Androgen receptor
huangqi	MOL000239	Jaranol	Sodium channel protein type 5 subunit alpha
huangqi	MOL000239	Jaranol	Prostaglandin G/H synthase 2
huangqi	MOL000239	Jaranol	Estrogen receptor beta
huangqi	MOL000239	Jaranol	Dipeptidyl peptidase IV
huangqi	MOL000239	Jaranol	Heat shock protein HSP 90
huangqi	MOL000239	Jaranol	Cell division protein kinase 2
huangqi	MOL000239	Jaranol	Serine/threonine-protein kinase Chk1
huangqi	MOL000239	Jaranol	Trypsin-1
huangqi	MOL000239	Jaranol	Nuclear receptor coactivator 2
huangqi	MOL000239	Jaranol	Calmodulin
huangqi	MOL000296	hederagenin	Progesterone receptor
huangqi	MOL000296	hederagenin	Nuclear receptor coactivator 2
huangqi	MOL000296	hederagenin	Muscarinic acetylcholine receptor M3
huangqi	MOL000296	hederagenin	Muscarinic acetylcholine receptor M1
huangqi	MOL000296	hederagenin	Gamma-aminobutyric-acid receptor alpha-2 subunit
huangqi	MOL000296	hederagenin	Gamma-aminobutyric-acid receptor alpha-3 subunit
huangqi	MOL000296	hederagenin	Muscarinic acetylcholine receptor M2
huangqi	MOL000296	hederagenin	Alpha-1B adrenergic receptor
huangqi	MOL000296	hederagenin	Gamma-aminobutyric acid receptor subunit alpha-1
huangqi	MOL000296	hederagenin	Glutamate receptor 2
huangqi	MOL000296	hederagenin	Gamma-aminobutyric-acid receptor subunit alpha-6
huangqi	MOL000296	hederagenin	Gamma-aminobutyric-acid receptor alpha-5 subunit
huangqi	MOL000296	hederagenin	Ig gamma-1 chain C region
huangqi	MOL000296	hederagenin	Alcohol dehydrogenase 1B
huangqi	MOL000296	hederagenin	Alcohol dehydrogenase 1C
huangqi	MOL000296	hederagenin	Lysozyme
huangqi	MOL000296	hederagenin	Nicotinate-nucleotide--dimethylbenzimidazole phosphoribosyltransferase
huangqi	MOL000296	hederagenin	Prostaglandin G/H synthase 1
huangqi	MOL000296	hederagenin	Sodium channel protein type 5 subunit alpha
huangqi	MOL000296	hederagenin	Prostaglandin G/H synthase 2
huangqi	MOL000296	hederagenin	Retinoic acid receptor RXR-alpha
huangqi	MOL000296	hederagenin	CGMP-inhibited 3',5'-cyclic phosphodiesterase A
huangqi	MOL000296	hederagenin	Sodium-dependent noradrenaline transporter
huangqi	MOL000296	hederagenin	Cytochrome P450-cam
huangqi	MOL000033	(3S,8S,9S,10R,13R,14S,17R)-10,13-dimethyl-17-[(2R,5S)-5-propan-2-yloctan-2-yl]-2,3,4,7,8,9,11,12,14,15,16,17-dodecahydro-1H-cyclopenta[a]phenanthren-3-ol	Progesterone receptor
huangqi	MOL000354	isorhamnetin	Nitric oxide synthase, inducible
huangqi	MOL000354	isorhamnetin	Prostaglandin G/H synthase 1
huangqi	MOL000354	isorhamnetin	Estrogen receptor
huangqi	MOL000354	isorhamnetin	Androgen receptor
huangqi	MOL000354	isorhamnetin	Peroxisome proliferator activated receptor gamma
huangqi	MOL000354	isorhamnetin	Prostaglandin G/H synthase 2
huangqi	MOL000354	isorhamnetin	mRNA of Protein-tyrosine phosphatase, non-receptor type 1
huangqi	MOL000354	isorhamnetin	Estrogen receptor beta
huangqi	MOL000354	isorhamnetin	Dipeptidyl peptidase IV
huangqi	MOL000354	isorhamnetin	Mitogen-activated protein kinase 14
huangqi	MOL000354	isorhamnetin	Glycogen synthase kinase-3 beta
huangqi	MOL000354	isorhamnetin	Heat shock protein HSP 90
huangqi	MOL000354	isorhamnetin	Cell division protein kinase 2
huangqi	MOL000354	isorhamnetin	Phosphatidylinositol-4,5-bisphosphate 3-kinase catalytic subunit, gamma isoform
huangqi	MOL000354	isorhamnetin	mRNA of PKA Catalytic Subunit C-alpha
huangqi	MOL000354	isorhamnetin	Trypsin-1
huangqi	MOL000354	isorhamnetin	Proto-oncogene serine/threonine-protein kinase Pim-1
huangqi	MOL000354	isorhamnetin	Cyclin-A2
huangqi	MOL000354	isorhamnetin	Nuclear receptor coactivator 2
huangqi	MOL000354	isorhamnetin	Calmodulin
huangqi	MOL000354	isorhamnetin	Glycogen phosphorylase, muscle form
huangqi	MOL000354	isorhamnetin	Peroxisome proliferator activated receptor delta
huangqi	MOL000354	isorhamnetin	Serine/threonine-protein kinase Chk1
huangqi	MOL000354	isorhamnetin	Aldose reductase
huangqi	MOL000354	isorhamnetin	Nuclear receptor coactivator 1
huangqi	MOL000354	isorhamnetin	Coagulation factor VII
huangqi	MOL000354	isorhamnetin	Thrombin
huangqi	MOL000354	isorhamnetin	Nitric-oxide synthase, endothelial
huangqi	MOL000354	isorhamnetin	Acetylcholinesterase
huangqi	MOL000354	isorhamnetin	Gamma-aminobutyric acid receptor subunit alpha-1
huangqi	MOL000354	isorhamnetin	Amine oxidase [flavin-containing] B
huangqi	MOL000354	isorhamnetin	Glutamate receptor 2
huangqi	MOL000354	isorhamnetin	Cytochrome P450-cam
huangqi	MOL000354	isorhamnetin	Transcription factor p65
huangqi	MOL000354	isorhamnetin	Xanthine dehydrogenase/oxidase
huangqi	MOL000354	isorhamnetin	Neutrophil cytosol factor 1
huangqi	MOL000354	isorhamnetin	Oxidized low-density lipoprotein receptor 1
huangqi	MOL000371	3,9-di-O-methylnissolin	Nitric oxide synthase, inducible
huangqi	MOL000371	3,9-di-O-methylnissolin	Prostaglandin G/H synthase 1
huangqi	MOL000371	3,9-di-O-methylnissolin	Muscarinic acetylcholine receptor M3
huangqi	MOL000371	3,9-di-O-methylnissolin	Thrombin
huangqi	MOL000371	3,9-di-O-methylnissolin	Muscarinic acetylcholine receptor M1
huangqi	MOL000371	3,9-di-O-methylnissolin	Estrogen receptor
huangqi	MOL000371	3,9-di-O-methylnissolin	Beta-1 adrenergic receptor
huangqi	MOL000371	3,9-di-O-methylnissolin	Sodium channel protein type 5 subunit alpha
huangqi	MOL000371	3,9-di-O-methylnissolin	Prostaglandin G/H synthase 2
huangqi	MOL000371	3,9-di-O-methylnissolin	Nitric-oxide synthase, endothelial
huangqi	MOL000371	3,9-di-O-methylnissolin	5-hydroxytryptamine receptor 3A
huangqi	MOL000371	3,9-di-O-methylnissolin	Alpha-2C adrenergic receptor
huangqi	MOL000371	3,9-di-O-methylnissolin	Retinoic acid receptor RXR-alpha
huangqi	MOL000371	3,9-di-O-methylnissolin	Acetylcholinesterase
huangqi	MOL000371	3,9-di-O-methylnissolin	CGMP-inhibited 3',5'-cyclic phosphodiesterase A
huangqi	MOL000371	3,9-di-O-methylnissolin	Alpha-1B adrenergic receptor
huangqi	MOL000371	3,9-di-O-methylnissolin	Beta-2 adrenergic receptor
huangqi	MOL000371	3,9-di-O-methylnissolin	Alpha-1D adrenergic receptor
huangqi	MOL000371	3,9-di-O-methylnissolin	Mu-type opioid receptor
huangqi	MOL000371	3,9-di-O-methylnissolin	Gamma-aminobutyric acid receptor subunit alpha-1
huangqi	MOL000371	3,9-di-O-methylnissolin	Trypsin-1
huangqi	MOL000371	3,9-di-O-methylnissolin	Nuclear receptor coactivator 2
huangqi	MOL000371	3,9-di-O-methylnissolin	Calmodulin
huangqi	MOL000378	7-O-methylisomucronulatol	Nitric oxide synthase, inducible
huangqi	MOL000378	7-O-methylisomucronulatol	Prostaglandin G/H synthase 1
huangqi	MOL000378	7-O-methylisomucronulatol	Dopamine D1 receptor
huangqi	MOL000378	7-O-methylisomucronulatol	Muscarinic acetylcholine receptor M3
huangqi	MOL000378	7-O-methylisomucronulatol	Thrombin
huangqi	MOL000378	7-O-methylisomucronulatol	Potassium voltage-gated channel subfamily H member 2
huangqi	MOL000378	7-O-methylisomucronulatol	Muscarinic acetylcholine receptor M1
huangqi	MOL000378	7-O-methylisomucronulatol	Estrogen receptor
huangqi	MOL000378	7-O-methylisomucronulatol	Androgen receptor
huangqi	MOL000378	7-O-methylisomucronulatol	Beta-1 adrenergic receptor
huangqi	MOL000378	7-O-methylisomucronulatol	Sodium channel protein type 5 subunit alpha
huangqi	MOL000378	7-O-methylisomucronulatol	Peroxisome proliferator activated receptor gamma
huangqi	MOL000378	7-O-methylisomucronulatol	Coagulation factor Xa
huangqi	MOL000378	7-O-methylisomucronulatol	Muscarinic acetylcholine receptor M5
huangqi	MOL000378	7-O-methylisomucronulatol	Prostaglandin G/H synthase 2
huangqi	MOL000378	7-O-methylisomucronulatol	Nitric-oxide synthase, endothelial
huangqi	MOL000378	7-O-methylisomucronulatol	Alpha-2C adrenergic receptor
huangqi	MOL000378	7-O-methylisomucronulatol	Muscarinic acetylcholine receptor M4
huangqi	MOL000378	7-O-methylisomucronulatol	Retinoic acid receptor RXR-alpha
huangqi	MOL000378	7-O-methylisomucronulatol	Delta-type opioid receptor
huangqi	MOL000378	7-O-methylisomucronulatol	CGMP-inhibited 3',5'-cyclic phosphodiesterase A
huangqi	MOL000378	7-O-methylisomucronulatol	5-hydroxytryptamine 2A receptor
huangqi	MOL000378	7-O-methylisomucronulatol	Alpha-1A adrenergic receptor
huangqi	MOL000378	7-O-methylisomucronulatol	Muscarinic acetylcholine receptor M2
huangqi	MOL000378	7-O-methylisomucronulatol	Alpha-1B adrenergic receptor
huangqi	MOL000378	7-O-methylisomucronulatol	Sodium-dependent dopamine transporter
huangqi	MOL000378	7-O-methylisomucronulatol	Beta-2 adrenergic receptor
huangqi	MOL000378	7-O-methylisomucronulatol	Alpha-1D adrenergic receptor
huangqi	MOL000378	7-O-methylisomucronulatol	Sodium-dependent serotonin transporter
huangqi	MOL000378	7-O-methylisomucronulatol	Estrogen receptor beta
huangqi	MOL000378	7-O-methylisomucronulatol	Gamma-aminobutyric acid receptor subunit alpha-1
huangqi	MOL000378	7-O-methylisomucronulatol	Dipeptidyl peptidase IV
huangqi	MOL000378	7-O-methylisomucronulatol	Mitogen-activated protein kinase 14
huangqi	MOL000378	7-O-methylisomucronulatol	Glycogen synthase kinase-3 beta
huangqi	MOL000378	7-O-methylisomucronulatol	Heat shock protein HSP 90
huangqi	MOL000378	7-O-methylisomucronulatol	Cell division protein kinase 2
huangqi	MOL000378	7-O-methylisomucronulatol	Serine/threonine-protein kinase Chk1
huangqi	MOL000378	7-O-methylisomucronulatol	mRNA of PKA Catalytic Subunit C-alpha
huangqi	MOL000378	7-O-methylisomucronulatol	Retinoic acid receptor RXR-beta
huangqi	MOL000378	7-O-methylisomucronulatol	Trypsin-1
huangqi	MOL000378	7-O-methylisomucronulatol	Proto-oncogene serine/threonine-protein kinase Pim-1
huangqi	MOL000378	7-O-methylisomucronulatol	Cyclin-A2
huangqi	MOL000378	7-O-methylisomucronulatol	Nuclear receptor coactivator 2
huangqi	MOL000378	7-O-methylisomucronulatol	Calcium-activated potassium channel subunit alpha 1
huangqi	MOL000378	7-O-methylisomucronulatol	Calmodulin
huangqi	MOL000379	9,10-dimethoxypterocarpan-3-O-尾-D-glucoside	Prostaglandin G/H synthase 2
huangqi	MOL000379	9,10-dimethoxypterocarpan-3-O-尾-D-glucoside	DNA topoisomerase II
huangqi	MOL000379	9,10-dimethoxypterocarpan-3-O-尾-D-glucoside	Nuclear receptor coactivator 2
huangqi	MOL000380	(6aR,11aR)-9,10-dimethoxy-6a,11a-dihydro-6H-benzofurano[3,2-c]chromen-3-ol	Nitric oxide synthase, inducible
huangqi	MOL000380	(6aR,11aR)-9,10-dimethoxy-6a,11a-dihydro-6H-benzofurano[3,2-c]chromen-3-ol	Prostaglandin G/H synthase 1
huangqi	MOL000380	(6aR,11aR)-9,10-dimethoxy-6a,11a-dihydro-6H-benzofurano[3,2-c]chromen-3-ol	Muscarinic acetylcholine receptor M3
huangqi	MOL000380	(6aR,11aR)-9,10-dimethoxy-6a,11a-dihydro-6H-benzofurano[3,2-c]chromen-3-ol	Thrombin
huangqi	MOL000380	(6aR,11aR)-9,10-dimethoxy-6a,11a-dihydro-6H-benzofurano[3,2-c]chromen-3-ol	Muscarinic acetylcholine receptor M1
huangqi	MOL000380	(6aR,11aR)-9,10-dimethoxy-6a,11a-dihydro-6H-benzofurano[3,2-c]chromen-3-ol	Estrogen receptor
huangqi	MOL000380	(6aR,11aR)-9,10-dimethoxy-6a,11a-dihydro-6H-benzofurano[3,2-c]chromen-3-ol	Sodium channel protein type 5 subunit alpha
huangqi	MOL000380	(6aR,11aR)-9,10-dimethoxy-6a,11a-dihydro-6H-benzofurano[3,2-c]chromen-3-ol	Prostaglandin G/H synthase 2
huangqi	MOL000380	(6aR,11aR)-9,10-dimethoxy-6a,11a-dihydro-6H-benzofurano[3,2-c]chromen-3-ol	5-hydroxytryptamine receptor 3A
huangqi	MOL000380	(6aR,11aR)-9,10-dimethoxy-6a,11a-dihydro-6H-benzofurano[3,2-c]chromen-3-ol	Retinoic acid receptor RXR-alpha
huangqi	MOL000380	(6aR,11aR)-9,10-dimethoxy-6a,11a-dihydro-6H-benzofurano[3,2-c]chromen-3-ol	Acetylcholinesterase
huangqi	MOL000380	(6aR,11aR)-9,10-dimethoxy-6a,11a-dihydro-6H-benzofurano[3,2-c]chromen-3-ol	Alpha-1B adrenergic receptor
huangqi	MOL000380	(6aR,11aR)-9,10-dimethoxy-6a,11a-dihydro-6H-benzofurano[3,2-c]chromen-3-ol	Beta-2 adrenergic receptor
huangqi	MOL000380	(6aR,11aR)-9,10-dimethoxy-6a,11a-dihydro-6H-benzofurano[3,2-c]chromen-3-ol	Alpha-1D adrenergic receptor
huangqi	MOL000380	(6aR,11aR)-9,10-dimethoxy-6a,11a-dihydro-6H-benzofurano[3,2-c]chromen-3-ol	Gamma-aminobutyric acid receptor subunit alpha-1
huangqi	MOL000380	(6aR,11aR)-9,10-dimethoxy-6a,11a-dihydro-6H-benzofurano[3,2-c]chromen-3-ol	Heat shock protein HSP 90
huangqi	MOL000380	(6aR,11aR)-9,10-dimethoxy-6a,11a-dihydro-6H-benzofurano[3,2-c]chromen-3-ol	Neuronal acetylcholine receptor protein, alpha-7 chain
huangqi	MOL000380	(6aR,11aR)-9,10-dimethoxy-6a,11a-dihydro-6H-benzofurano[3,2-c]chromen-3-ol	Trypsin-1
huangqi	MOL000380	(6aR,11aR)-9,10-dimethoxy-6a,11a-dihydro-6H-benzofurano[3,2-c]chromen-3-ol	Nuclear receptor coactivator 2
huangqi	MOL000380	(6aR,11aR)-9,10-dimethoxy-6a,11a-dihydro-6H-benzofurano[3,2-c]chromen-3-ol	Nuclear receptor coactivator 1
huangqi	MOL000380	(6aR,11aR)-9,10-dimethoxy-6a,11a-dihydro-6H-benzofurano[3,2-c]chromen-3-ol	Calmodulin
huangqi	MOL000380	(6aR,11aR)-9,10-dimethoxy-6a,11a-dihydro-6H-benzofurano[3,2-c]chromen-3-ol	Muscarinic acetylcholine receptor M4
huangqi	MOL000387	Bifendate	Prostaglandin G/H synthase 2
huangqi	MOL000387	Bifendate	Vascular endothelial growth factor receptor 2
huangqi	MOL000387	Bifendate	Hepatocyte growth factor receptor
huangqi	MOL000387	Bifendate	Heat shock protein HSP 90
huangqi	MOL000387	Bifendate	Calcium-activated potassium channel subunit alpha 1
huangqi	MOL000387	Bifendate	Prostaglandin G/H synthase 1
huangqi	MOL000387	Bifendate	DNA topoisomerase II
huangqi	MOL000392	formononetin	Nitric oxide synthase, inducible
huangqi	MOL000392	formononetin	Prostaglandin G/H synthase 1
huangqi	MOL000392	formononetin	Muscarinic acetylcholine receptor M1
huangqi	MOL000392	formononetin	Estrogen receptor
huangqi	MOL000392	formononetin	Androgen receptor
huangqi	MOL000392	formononetin	Peroxisome proliferator activated receptor gamma
huangqi	MOL000392	formononetin	Prostaglandin G/H synthase 2
huangqi	MOL000392	formononetin	Retinoic acid receptor RXR-alpha
huangqi	MOL000392	formononetin	CGMP-inhibited 3',5'-cyclic phosphodiesterase A
huangqi	MOL000392	formononetin	Alpha-1A adrenergic receptor
huangqi	MOL000392	formononetin	Sodium-dependent dopamine transporter
huangqi	MOL000392	formononetin	Beta-2 adrenergic receptor
huangqi	MOL000392	formononetin	Sodium-dependent serotonin transporter
huangqi	MOL000392	formononetin	Estrogen receptor beta
huangqi	MOL000392	formononetin	Dipeptidyl peptidase IV
huangqi	MOL000392	formononetin	Mitogen-activated protein kinase 14
huangqi	MOL000392	formononetin	Glycogen synthase kinase-3 beta
huangqi	MOL000392	formononetin	Heat shock protein HSP 90
huangqi	MOL000392	formononetin	Cell division protein kinase 2
huangqi	MOL000392	formononetin	Amine oxidase [flavin-containing] B
huangqi	MOL000392	formononetin	Serine/threonine-protein kinase Chk1
huangqi	MOL000392	formononetin	mRNA of PKA Catalytic Subunit C-alpha
huangqi	MOL000392	formononetin	Trypsin-1
huangqi	MOL000392	formononetin	Proto-oncogene serine/threonine-protein kinase Pim-1
huangqi	MOL000392	formononetin	Cyclin-A2
huangqi	MOL000392	formononetin	Calmodulin
huangqi	MOL000392	formononetin	cAMP-dependent protein kinase inhibitor alpha
huangqi	MOL000392	formononetin	Thrombin
huangqi	MOL000392	formononetin	Nitric-oxide synthase, endothelial
huangqi	MOL000392	formononetin	Acetylcholinesterase
huangqi	MOL000392	formononetin	Beta-lactamase
huangqi	MOL000392	formononetin	Transcription factor AP-1
huangqi	MOL000392	formononetin	Peroxisome proliferator-activated receptor gamma
huangqi	MOL000392	formononetin	Interleukin-4
huangqi	MOL000392	formononetin	NAD-dependent deacetylase sirtuin-1
huangqi	MOL000392	formononetin	ATP synthase subunit beta, mitochondrial
huangqi	MOL000392	formononetin	NADH-ubiquinone oxidoreductase chain 6
huangqi	MOL000392	formononetin	3 beta-hydroxysteroid dehydrogenase/Delta 5--&gt;4-isomerase type 2
huangqi	MOL000392	formononetin	3 beta-hydroxysteroid dehydrogenase/Delta 5--&gt;4-isomerase type 1
huangqi	MOL000417	Calycosin	Nitric oxide synthase, inducible
huangqi	MOL000417	Calycosin	Prostaglandin G/H synthase 1
huangqi	MOL000417	Calycosin	Estrogen receptor
huangqi	MOL000417	Calycosin	Androgen receptor
huangqi	MOL000417	Calycosin	Peroxisome proliferator activated receptor gamma
huangqi	MOL000417	Calycosin	Prostaglandin G/H synthase 2
huangqi	MOL000417	Calycosin	Retinoic acid receptor RXR-alpha
huangqi	MOL000417	Calycosin	CGMP-inhibited 3',5'-cyclic phosphodiesterase A
huangqi	MOL000417	Calycosin	Estrogen receptor beta
huangqi	MOL000417	Calycosin	Dipeptidyl peptidase IV
huangqi	MOL000417	Calycosin	Mitogen-activated protein kinase 14
huangqi	MOL000417	Calycosin	Glycogen synthase kinase-3 beta
huangqi	MOL000417	Calycosin	Heat shock protein HSP 90
huangqi	MOL000417	Calycosin	Cell division protein kinase 2
huangqi	MOL000417	Calycosin	Serine/threonine-protein kinase Chk1
huangqi	MOL000417	Calycosin	mRNA of PKA Catalytic Subunit C-alpha
huangqi	MOL000417	Calycosin	Trypsin-1
huangqi	MOL000417	Calycosin	Proto-oncogene serine/threonine-protein kinase Pim-1
huangqi	MOL000417	Calycosin	Cyclin-A2
huangqi	MOL000417	Calycosin	Nuclear receptor coactivator 2
huangqi	MOL000417	Calycosin	Calmodulin
huangqi	MOL000417	Calycosin	Beta-2 adrenergic receptor
huangqi	MOL000422	kaempferol	Nitric oxide synthase, inducible
huangqi	MOL000422	kaempferol	Prostaglandin G/H synthase 1
huangqi	MOL000422	kaempferol	Androgen receptor
huangqi	MOL000422	kaempferol	Peroxisome proliferator activated receptor gamma
huangqi	MOL000422	kaempferol	Prostaglandin G/H synthase 2
huangqi	MOL000422	kaempferol	Heat shock protein HSP 90
huangqi	MOL000422	kaempferol	Phosphatidylinositol-4,5-bisphosphate 3-kinase catalytic subunit, gamma isoform
huangqi	MOL000422	kaempferol	mRNA of PKA Catalytic Subunit C-alpha
huangqi	MOL000422	kaempferol	Nuclear receptor coactivator 2
huangqi	MOL000422	kaempferol	Dipeptidyl peptidase IV
huangqi	MOL000422	kaempferol	Trypsin-1
huangqi	MOL000422	kaempferol	Progesterone receptor
huangqi	MOL000422	kaempferol	Thrombin
huangqi	MOL000422	kaempferol	Muscarinic acetylcholine receptor M1
huangqi	MOL000422	kaempferol	Nitric-oxide synthase, endothelial
huangqi	MOL000422	kaempferol	Gamma-aminobutyric-acid receptor alpha-2 subunit
huangqi	MOL000422	kaempferol	Acetylcholinesterase
huangqi	MOL000422	kaempferol	Sodium-dependent noradrenaline transporter
huangqi	MOL000422	kaempferol	Muscarinic acetylcholine receptor M2
huangqi	MOL000422	kaempferol	Alpha-1B adrenergic receptor
huangqi	MOL000422	kaempferol	Gamma-aminobutyric acid receptor subunit alpha-1
huangqi	MOL000422	kaempferol	DNA topoisomerase II
huangqi	MOL000422	kaempferol	Coagulation factor VII
huangqi	MOL000422	kaempferol	Calmodulin
huangqi	MOL000422	kaempferol	Transcription factor p65
huangqi	MOL000422	kaempferol	Inhibitor of nuclear factor kappa-B kinase subunit beta
huangqi	MOL000422	kaempferol	RAC-alpha serine/threonine-protein kinase
huangqi	MOL000422	kaempferol	Apoptosis regulator Bcl-2
huangqi	MOL000422	kaempferol	Apoptosis regulator BAX
huangqi	MOL000422	kaempferol	Tumor necrosis factor
huangqi	MOL000422	kaempferol	Transcription factor AP-1
huangqi	MOL000422	kaempferol	Activator of 90 kDa heat shock protein ATPase homolog 1
huangqi	MOL000422	kaempferol	Caspase-3
huangqi	MOL000422	kaempferol	Mitogen-activated protein kinase 8
huangqi	MOL000422	kaempferol	Xanthine dehydrogenase/oxidase
huangqi	MOL000422	kaempferol	Interstitial collagenase
huangqi	MOL000422	kaempferol	Signal transducer and activator of transcription 1-alpha/beta
huangqi	MOL000422	kaempferol	Cell division control protein 2 homolog
huangqi	MOL000422	kaempferol	Peroxisome proliferator-activated receptor gamma
huangqi	MOL000422	kaempferol	Heme oxygenase 1
huangqi	MOL000422	kaempferol	Cytochrome P450 3A4
huangqi	MOL000422	kaempferol	Cytochrome P450 1A2
huangqi	MOL000422	kaempferol	Cytochrome P450 1A1
huangqi	MOL000422	kaempferol	Intercellular adhesion molecule 1
huangqi	MOL000422	kaempferol	E-selectin
huangqi	MOL000422	kaempferol	Vascular cell adhesion protein 1
huangqi	MOL000422	kaempferol	Nuclear receptor subfamily 1 group I member 2
huangqi	MOL000422	kaempferol	Cytochrome P450 1B1
huangqi	MOL000422	kaempferol	Arachidonate 5-lipoxygenase
huangqi	MOL000422	kaempferol	Hyaluronan synthase 2
huangqi	MOL000422	kaempferol	Glutathione S-transferase P
huangqi	MOL000422	kaempferol	Aryl hydrocarbon receptor
huangqi	MOL000422	kaempferol	26S proteasome non-ATPase regulatory subunit 3
huangqi	MOL000422	kaempferol	Solute carrier family 2, facilitated glucose transporter member 4
huangqi	MOL000422	kaempferol	Nuclear receptor subfamily 1 group I member 3
huangqi	MOL000422	kaempferol	Insulin receptor
huangqi	MOL000422	kaempferol	Type I iodothyronine deiodinase
huangqi	MOL000422	kaempferol	Serine/threonine-protein phosphatase 2B catalytic subunit alpha isoform
huangqi	MOL000422	kaempferol	Peroxidase C1A
huangqi	MOL000422	kaempferol	Glutathione S-transferase Mu 1
huangqi	MOL000422	kaempferol	Glutathione S-transferase Mu 2
huangqi	MOL000422	kaempferol	Aldo-keto reductase family 1 member C3
huangqi	MOL000422	kaempferol	Antileukoproteinase
huangqi	MOL000433	FA	Cell division protein kinase 2
huangqi	MOL000433	FA	Thrombin
huangqi	MOL000433	FA	Glycogen synthase kinase-3 beta
huangqi	MOL000439	isomucronulatol-7,2'-di-O-glucosiole	DNA topoisomerase II
huangqi	MOL000442	1,7-Dihydroxy-3,9-dimethoxy pterocarpene	Prostaglandin G/H synthase 2
huangqi	MOL000442	1,7-Dihydroxy-3,9-dimethoxy pterocarpene	Retinoic acid receptor RXR-alpha
huangqi	MOL000442	1,7-Dihydroxy-3,9-dimethoxy pterocarpene	Heat shock protein HSP 90
huangqi	MOL000442	1,7-Dihydroxy-3,9-dimethoxy pterocarpene	Trypsin-1
huangqi	MOL000098	quercetin	Prostaglandin G/H synthase 1
huangqi	MOL000098	quercetin	Androgen receptor
huangqi	MOL000098	quercetin	Peroxisome proliferator activated receptor gamma
huangqi	MOL000098	quercetin	Prostaglandin G/H synthase 2
huangqi	MOL000098	quercetin	Heat shock protein HSP 90
huangqi	MOL000098	quercetin	Phosphatidylinositol-4,5-bisphosphate 3-kinase catalytic subunit, gamma isoform
huangqi	MOL000098	quercetin	Nuclear receptor coactivator 2
huangqi	MOL000098	quercetin	Dipeptidyl peptidase IV
huangqi	MOL000098	quercetin	Aldose reductase
huangqi	MOL000098	quercetin	Trypsin-1
huangqi	MOL000098	quercetin	DNA topoisomerase II
huangqi	MOL000098	quercetin	Thrombin
huangqi	MOL000098	quercetin	Potassium voltage-gated channel subfamily H member 2
huangqi	MOL000098	quercetin	Sodium channel protein type 5 subunit alpha
huangqi	MOL000098	quercetin	Coagulation factor Xa
huangqi	MOL000098	quercetin	Beta-2 adrenergic receptor
huangqi	MOL000098	quercetin	Stromelysin-1
huangqi	MOL000098	quercetin	mRNA of PKA Catalytic Subunit C-alpha
huangqi	MOL000098	quercetin	Coagulation factor VII
huangqi	MOL000098	quercetin	Nitric-oxide synthase, endothelial
huangqi	MOL000098	quercetin	Retinoic acid receptor RXR-alpha
huangqi	MOL000098	quercetin	Acetylcholinesterase
huangqi	MOL000098	quercetin	Gamma-aminobutyric acid receptor subunit alpha-1
huangqi	MOL000098	quercetin	Amine oxidase [flavin-containing] B
huangqi	MOL000098	quercetin	Transcription factor p65
huangqi	MOL000098	quercetin	Epidermal growth factor receptor
huangqi	MOL000098	quercetin	RAC-alpha serine/threonine-protein kinase
huangqi	MOL000098	quercetin	Vascular endothelial growth factor A
huangqi	MOL000098	quercetin	G1/S-specific cyclin-D1
huangqi	MOL000098	quercetin	Apoptosis regulator Bcl-2
huangqi	MOL000098	quercetin	Bcl-2-like protein 1
huangqi	MOL000098	quercetin	Proto-oncogene c-Fos
huangqi	MOL000098	quercetin	Cyclin-dependent kinase inhibitor 1
huangqi	MOL000098	quercetin	Eukaryotic translation initiation factor 6
huangqi	MOL000098	quercetin	Apoptosis regulator BAX
huangqi	MOL000098	quercetin	Caspase-9
huangqi	MOL000098	quercetin	Urokinase-type plasminogen activator
huangqi	MOL000098	quercetin	72 kDa type IV collagenase
huangqi	MOL000098	quercetin	Matrix metalloproteinase-9
huangqi	MOL000098	quercetin	Mitogen-activated protein kinase 1
huangqi	MOL000098	quercetin	Interleukin-10
huangqi	MOL000098	quercetin	Pro-epidermal growth factor
huangqi	MOL000098	quercetin	Retinoblastoma-associated protein
huangqi	MOL000098	quercetin	Tumor necrosis factor
huangqi	MOL000098	quercetin	Transcription factor AP-1
huangqi	MOL000098	quercetin	Interleukin-6
huangqi	MOL000098	quercetin	Cyclin-dependent kinase inhibitor 2A, isoforms 1/2/3
huangqi	MOL000098	quercetin	Activator of 90 kDa heat shock protein ATPase homolog 1
huangqi	MOL000098	quercetin	Caspase-3
huangqi	MOL000098	quercetin	Cellular tumor antigen p53
huangqi	MOL000098	quercetin	ETS domain-containing protein Elk-1
huangqi	MOL000098	quercetin	NF-kappa-B inhibitor alpha
huangqi	MOL000098	quercetin	NADPH--cytochrome P450 reductase
huangqi	MOL000098	quercetin	Ornithine decarboxylase
huangqi	MOL000098	quercetin	Xanthine dehydrogenase/oxidase
huangqi	MOL000098	quercetin	Caspase-8
huangqi	MOL000098	quercetin	DNA topoisomerase 1
huangqi	MOL000098	quercetin	RAF proto-oncogene serine/threonine-protein kinase
huangqi	MOL000098	quercetin	Superoxide dismutase [Cu-Zn]
huangqi	MOL000098	quercetin	Protein kinase C alpha type
huangqi	MOL000098	quercetin	Interstitial collagenase
huangqi	MOL000098	quercetin	Hypoxia-inducible factor 1-alpha
huangqi	MOL000098	quercetin	Signal transducer and activator of transcription 1-alpha/beta
huangqi	MOL000098	quercetin	Protein CBFA2T1
huangqi	MOL000098	quercetin	Probable E3 ubiquitin-protein ligase HERC5
huangqi	MOL000098	quercetin	Cell division control protein 2 homolog
huangqi	MOL000098	quercetin	78 kDa glucose-regulated protein
huangqi	MOL000098	quercetin	Receptor tyrosine-protein kinase erbB-2
huangqi	MOL000098	quercetin	Peroxisome proliferator-activated receptor gamma
huangqi	MOL000098	quercetin	Acetyl-CoA carboxylase 1
huangqi	MOL000098	quercetin	Heme oxygenase 1
huangqi	MOL000098	quercetin	Cytochrome P450 3A4
huangqi	MOL000098	quercetin	Cytochrome P450 1A2
huangqi	MOL000098	quercetin	Caveolin-1
huangqi	MOL000098	quercetin	Myc proto-oncogene protein
huangqi	MOL000098	quercetin	Tissue factor
huangqi	MOL000098	quercetin	Gap junction alpha-1 protein
huangqi	MOL000098	quercetin	Cytochrome P450 1A1
huangqi	MOL000098	quercetin	Intercellular adhesion molecule 1
huangqi	MOL000098	quercetin	Interleukin-1 beta
huangqi	MOL000098	quercetin	C-C motif chemokine 2
huangqi	MOL000098	quercetin	E-selectin
huangqi	MOL000098	quercetin	Vascular cell adhesion protein 1
huangqi	MOL000098	quercetin	Prostaglandin E2 receptor EP3 subtype
huangqi	MOL000098	quercetin	Interleukin-8
huangqi	MOL000098	quercetin	Protein kinase C beta type
huangqi	MOL000098	quercetin	Baculoviral IAP repeat-containing protein 5
huangqi	MOL000098	quercetin	Dual oxidase 2
huangqi	MOL000098	quercetin	Nitric oxide synthase, endothelial
huangqi	MOL000098	quercetin	Heat shock protein beta-1
huangqi	MOL000098	quercetin	Transforming growth factor beta-1
huangqi	MOL000098	quercetin	Estrogen sulfotransferase
huangqi	MOL000098	quercetin	Maltase-glucoamylase, intestinal
huangqi	MOL000098	quercetin	Interleukin-2
huangqi	MOL000098	quercetin	Nuclear receptor subfamily 1 group I member 2
huangqi	MOL000098	quercetin	Cytochrome P450 1B1
huangqi	MOL000098	quercetin	G2/mitotic-specific cyclin-B1
huangqi	MOL000098	quercetin	Tissue-type plasminogen activator
huangqi	MOL000098	quercetin	Thrombomodulin
huangqi	MOL000098	quercetin	Plasminogen activator inhibitor 1
huangqi	MOL000098	quercetin	Collagen alpha-1(I) chain
huangqi	MOL000098	quercetin	Interferon gamma
huangqi	MOL000098	quercetin	Arachidonate 5-lipoxygenase
huangqi	MOL000098	quercetin	Phosphatidylinositol-3,4,5-trisphosphate 3-phosphatase and dual-specificity protein phosphatase PTEN
huangqi	MOL000098	quercetin	Interleukin-1 alpha
huangqi	MOL000098	quercetin	Myeloperoxidase
huangqi	MOL000098	quercetin	DNA topoisomerase 2-alpha
huangqi	MOL000098	quercetin	Neutrophil cytosol factor 1
huangqi	MOL000098	quercetin	ATP-binding cassette sub-family G member 2
huangqi	MOL000098	quercetin	Hyaluronan synthase 2
huangqi	MOL000098	quercetin	Glutathione S-transferase P
huangqi	MOL000098	quercetin	Nuclear factor erythroid 2-related factor 2
huangqi	MOL000098	quercetin	NAD(P)H dehydrogenase [quinone] 1
huangqi	MOL000098	quercetin	Poly [ADP-ribose] polymerase 1
huangqi	MOL000098	quercetin	Aryl hydrocarbon receptor
huangqi	MOL000098	quercetin	26S proteasome non-ATPase regulatory subunit 3
huangqi	MOL000098	quercetin	Solute carrier family 2, facilitated glucose transporter member 4
huangqi	MOL000098	quercetin	Collagen alpha-1(III) chain
huangqi	MOL000098	quercetin	DNA gyrase subunit B
huangqi	MOL000098	quercetin	C-X-C motif chemokine 11
huangqi	MOL000098	quercetin	C-X-C motif chemokine 2
huangqi	MOL000098	quercetin	DDB1- and CUL4-associated factor 5
huangqi	MOL000098	quercetin	Nuclear receptor subfamily 1 group I member 3
huangqi	MOL000098	quercetin	Serine/threonine-protein kinase Chk2
huangqi	MOL000098	quercetin	Insulin receptor
huangqi	MOL000098	quercetin	Claudin-4
huangqi	MOL000098	quercetin	Peroxisome proliferator-activated receptor alpha
huangqi	MOL000098	quercetin	Peroxisome proliferator-activated receptor delta
huangqi	MOL000098	quercetin	Heat shock factor protein 1
huangqi	MOL000098	quercetin	C-reactive protein
huangqi	MOL000098	quercetin	C-X-C motif chemokine 10
huangqi	MOL000098	quercetin	Inhibitor of nuclear factor kappa-B kinase subunit alpha
huangqi	MOL000098	quercetin	Osteopontin
huangqi	MOL000098	quercetin	Runt-related transcription factor 2
huangqi	MOL000098	quercetin	Ras association domain-containing protein 1
huangqi	MOL000098	quercetin	Transcription factor E2F1
huangqi	MOL000098	quercetin	Transcription factor E2F2
huangqi	MOL000098	quercetin	Prostatic acid phosphatase
huangqi	MOL000098	quercetin	Cathepsin D
huangqi	MOL000098	quercetin	Insulin-like growth factor-binding protein 3
huangqi	MOL000098	quercetin	Insulin-like growth factor II
huangqi	MOL000098	quercetin	CD40 ligand
huangqi	MOL000098	quercetin	Interferon regulatory factor 1
huangqi	MOL000098	quercetin	Receptor tyrosine-protein kinase erbB-3
huangqi	MOL000098	quercetin	Serum paraoxonase/arylesterase 1
huangqi	MOL000098	quercetin	Type I iodothyronine deiodinase
huangqi	MOL000098	quercetin	Procollagen C-endopeptidase enhancer 1
huangqi	MOL000098	quercetin	Puromycin-sensitive aminopeptidase
huangqi	MOL000098	quercetin	Hexokinase-2
huangqi	MOL000098	quercetin	Homeobox protein Nkx-3.1
huangqi	MOL000098	quercetin	Ras GTPase-activating protein 1
huangqi	MOL000098	quercetin	Peroxidase C1A
huangqi	MOL000098	quercetin	Glutathione S-transferase Mu 1
huangqi	MOL000098	quercetin	Glutathione S-transferase Mu 2
huangqi	MOL000098	quercetin	Interferon gamma
huangqi	MOL000098	quercetin	Arachidonate 5-lipoxygenase
huangqi	MOL000098	quercetin	Phosphatidylinositol-3,4,5-trisphosphate 3-phosphatase and dual-specificity protein phosphatase PTEN
huangqi	MOL000098	quercetin	Interleukin-1 alpha
huangqi	MOL000098	quercetin	Myeloperoxidase
huangqi	MOL000098	quercetin	DNA topoisomerase 2-alpha
huangqi	MOL000098	quercetin	Neutrophil cytosol factor 1
huangqi	MOL000098	quercetin	ATP-binding cassette sub-family G member 2
huangqi	MOL000098	quercetin	Hyaluronan synthase 2
huangqi	MOL000098	quercetin	Glutathione S-transferase P
huangqi	MOL000098	quercetin	Nuclear factor erythroid 2-related factor 2
huangqi	MOL000098	quercetin	NAD(P)H dehydrogenase [quinone] 1
huangqi	MOL000098	quercetin	Poly [ADP-ribose] polymerase 1
huangqi	MOL000098	quercetin	Aryl hydrocarbon receptor
huangqi	MOL000098	quercetin	26S proteasome non-ATPase regulatory subunit 3
huangqi	MOL000098	quercetin	Solute carrier family 2, facilitated glucose transporter member 4
huangqi	MOL000098	quercetin	Collagen alpha-1(III) chain
huangqi	MOL000098	quercetin	DNA gyrase subunit B
huangqi	MOL000098	quercetin	C-X-C motif chemokine 11
huangqi	MOL000098	quercetin	C-X-C motif chemokine 2
huangqi	MOL000098	quercetin	DDB1- and CUL4-associated factor 5
huangqi	MOL000098	quercetin	Nuclear receptor subfamily 1 group I member 3
huangqi	MOL000098	quercetin	Serine/threonine-protein kinase Chk2
huangqi	MOL000098	quercetin	Insulin receptor
huangqi	MOL000098	quercetin	Claudin-4
huangqi	MOL000098	quercetin	Peroxisome proliferator-activated receptor alpha
huangqi	MOL000098	quercetin	Peroxisome proliferator-activated receptor delta
huangqi	MOL000098	quercetin	Heat shock factor protein 1
huangqi	MOL000098	quercetin	C-reactive protein
huangqi	MOL000098	quercetin	C-X-C motif chemokine 10
huangqi	MOL000098	quercetin	Inhibitor of nuclear factor kappa-B kinase subunit alpha
huangqi	MOL000098	quercetin	Osteopontin
huangqi	MOL000098	quercetin	Runt-related transcription factor 2
huangqi	MOL000098	quercetin	Ras association domain-containing protein 1
huangqi	MOL000098	quercetin	Transcription factor E2F1
huangqi	MOL000098	quercetin	Transcription factor E2F2
huangqi	MOL000098	quercetin	Prostatic acid phosphatase
huangqi	MOL000098	quercetin	Cathepsin D
huangqi	MOL000098	quercetin	Insulin-like growth factor-binding protein 3
huangqi	MOL000098	quercetin	Insulin-like growth factor II
huangqi	MOL000098	quercetin	CD40 ligand
huangqi	MOL000098	quercetin	Interferon regulatory factor 1
huangqi	MOL000098	quercetin	Receptor tyrosine-protein kinase erbB-3
huangqi	MOL000098	quercetin	Serum paraoxonase/arylesterase 1
huangqi	MOL000098	quercetin	Type I iodothyronine deiodinase
huangqi	MOL000098	quercetin	Procollagen C-endopeptidase enhancer 1
huangqi	MOL000098	quercetin	Puromycin-sensitive aminopeptidase
huangqi	MOL000098	quercetin	Hexokinase-2
huangqi	MOL000098	quercetin	Homeobox protein Nkx-3.1
huangqi	MOL000098	quercetin	Ras GTPase-activating protein 1
huangqi	MOL000098	quercetin	Peroxidase C1A
huangqi	MOL000098	quercetin	Glutathione S-transferase Mu 1
huangqi	MOL000098	quercetin	Glutathione S-transferase Mu 2
jianghuang	MOL000449	Stigmasterol	Progesterone receptor
jianghuang	MOL000449	Stigmasterol	Mineralocorticoid receptor
jianghuang	MOL000449	Stigmasterol	Nuclear receptor coactivator 2
jianghuang	MOL000449	Stigmasterol	Alcohol dehydrogenase 1C
jianghuang	MOL000449	Stigmasterol	Ig gamma-1 chain C region
jianghuang	MOL000449	Stigmasterol	Retinoic acid receptor RXR-alpha
jianghuang	MOL000449	Stigmasterol	Nuclear receptor coactivator 1
jianghuang	MOL000449	Stigmasterol	Prostaglandin G/H synthase 1
jianghuang	MOL000449	Stigmasterol	Prostaglandin G/H synthase 2
jianghuang	MOL000449	Stigmasterol	Alpha-2A adrenergic receptor
jianghuang	MOL000449	Stigmasterol	Sodium-dependent noradrenaline transporter
jianghuang	MOL000449	Stigmasterol	Sodium-dependent dopamine transporter
jianghuang	MOL000449	Stigmasterol	Beta-2 adrenergic receptor
jianghuang	MOL000449	Stigmasterol	Aldose reductase
jianghuang	MOL000449	Stigmasterol	Urokinase-type plasminogen activator
jianghuang	MOL000449	Stigmasterol	Leukotriene A-4 hydrolase
jianghuang	MOL000449	Stigmasterol	Amine oxidase [flavin-containing] B
jianghuang	MOL000449	Stigmasterol	Amine oxidase [flavin-containing] A
jianghuang	MOL000449	Stigmasterol	mRNA of PKA Catalytic Subunit C-alpha
jianghuang	MOL000449	Stigmasterol	Chymotrypsinogen B
jianghuang	MOL000449	Stigmasterol	Muscarinic acetylcholine receptor M3
jianghuang	MOL000449	Stigmasterol	Muscarinic acetylcholine receptor M1
jianghuang	MOL000449	Stigmasterol	Beta-1 adrenergic receptor
jianghuang	MOL000449	Stigmasterol	Sodium channel protein type 5 subunit alpha
jianghuang	MOL000449	Stigmasterol	5-hydroxytryptamine 2A receptor
jianghuang	MOL000449	Stigmasterol	Alpha-1A adrenergic receptor
jianghuang	MOL000449	Stigmasterol	Gamma-aminobutyric-acid receptor alpha-3 subunit
jianghuang	MOL000449	Stigmasterol	Muscarinic acetylcholine receptor M2
jianghuang	MOL000449	Stigmasterol	Alpha-1B adrenergic receptor
jianghuang	MOL000449	Stigmasterol	Gamma-aminobutyric acid receptor subunit alpha-1
jianghuang	MOL000449	Stigmasterol	Neuronal acetylcholine receptor protein, alpha-7 chain
jianghuang	MOL000493	campesterol	Progesterone receptor
jianghuang	MOL000493	campesterol	Prostaglandin G/H synthase 1
jianghuang	MOL000493	campesterol	Prostaglandin G/H synthase 2
jianghuang	MOL000493	campesterol	Heat shock protein HSP 90
jianghuang	MOL000493	campesterol	Phosphatidylinositol-4,5-bisphosphate 3-kinase catalytic subunit, gamma isoform
jianghuang	MOL000493	campesterol	Nuclear receptor coactivator 2
jianghuang	MOL000953	CLR	Progesterone receptor
jianghuang	MOL000953	CLR	Mineralocorticoid receptor
jianghuang	MOL000953	CLR	Cytochrome P450-cam
jianghuang	MOL000953	CLR	Nuclear receptor coactivator 2
shegan	MOL002322	isovitexin	Prostaglandin G/H synthase 2
shegan	MOL002322	isovitexin	Androgen receptor
shegan	MOL002322	isovitexin	DNA topoisomerase II
shegan	MOL002322	isovitexin	Transcription factor p65
shegan	MOL002322	isovitexin	Inhibitor of nuclear factor kappa-B kinase subunit beta
shegan	MOL002322	isovitexin	Tumor necrosis factor
shegan	MOL001735	Dinatin	Nitric oxide synthase, inducible
shegan	MOL001735	Dinatin	Prostaglandin G/H synthase 1
shegan	MOL001735	Dinatin	Prostaglandin G/H synthase 2
shegan	MOL001735	Dinatin	Dipeptidyl peptidase IV
shegan	MOL001735	Dinatin	Heat shock protein HSP 90
shegan	MOL001735	Dinatin	Phosphatidylinositol-4,5-bisphosphate 3-kinase catalytic subunit, gamma isoform
shegan	MOL001735	Dinatin	mRNA of PKA Catalytic Subunit C-alpha
shegan	MOL001735	Dinatin	Trypsin-1
shegan	MOL001735	Dinatin	Nuclear receptor coactivator 2
shegan	MOL001735	Dinatin	Nuclear receptor coactivator 1
shegan	MOL001735	Dinatin	Calmodulin
shegan	MOL001735	Dinatin	Thrombin
shegan	MOL001735	Dinatin	Nitric-oxide synthase, endothelial
shegan	MOL001735	Dinatin	Acetylcholinesterase
shegan	MOL001735	Dinatin	Rhodopsin
shegan	MOL001735	Dinatin	Ig gamma-1 chain C region
shegan	MOL001735	Dinatin	Ferrichrome-iron receptor
shegan	MOL000449	Stigmasterol	Progesterone receptor
shegan	MOL000449	Stigmasterol	Mineralocorticoid receptor
shegan	MOL000449	Stigmasterol	Nuclear receptor coactivator 2
shegan	MOL000449	Stigmasterol	Alcohol dehydrogenase 1C
shegan	MOL000449	Stigmasterol	Ig gamma-1 chain C region
shegan	MOL000449	Stigmasterol	Retinoic acid receptor RXR-alpha
shegan	MOL000449	Stigmasterol	Nuclear receptor coactivator 1
shegan	MOL000449	Stigmasterol	Prostaglandin G/H synthase 1
shegan	MOL000449	Stigmasterol	Prostaglandin G/H synthase 2
shegan	MOL000449	Stigmasterol	Alpha-2A adrenergic receptor
shegan	MOL000449	Stigmasterol	Sodium-dependent noradrenaline transporter
shegan	MOL000449	Stigmasterol	Sodium-dependent dopamine transporter
shegan	MOL000449	Stigmasterol	Beta-2 adrenergic receptor
shegan	MOL000449	Stigmasterol	Aldose reductase
shegan	MOL000449	Stigmasterol	Urokinase-type plasminogen activator
shegan	MOL000449	Stigmasterol	Leukotriene A-4 hydrolase
shegan	MOL000449	Stigmasterol	Amine oxidase [flavin-containing] B
shegan	MOL000449	Stigmasterol	Amine oxidase [flavin-containing] A
shegan	MOL000449	Stigmasterol	mRNA of PKA Catalytic Subunit C-alpha
shegan	MOL000449	Stigmasterol	Chymotrypsinogen B
shegan	MOL000449	Stigmasterol	Muscarinic acetylcholine receptor M3
shegan	MOL000449	Stigmasterol	Muscarinic acetylcholine receptor M1
shegan	MOL000449	Stigmasterol	Beta-1 adrenergic receptor
shegan	MOL000449	Stigmasterol	Sodium channel protein type 5 subunit alpha
shegan	MOL000449	Stigmasterol	5-hydroxytryptamine 2A receptor
shegan	MOL000449	Stigmasterol	Alpha-1A adrenergic receptor
shegan	MOL000449	Stigmasterol	Gamma-aminobutyric-acid receptor alpha-3 subunit
shegan	MOL000449	Stigmasterol	Muscarinic acetylcholine receptor M2
shegan	MOL000449	Stigmasterol	Alpha-1B adrenergic receptor
shegan	MOL000449	Stigmasterol	Gamma-aminobutyric acid receptor subunit alpha-1
shegan	MOL000449	Stigmasterol	Neuronal acetylcholine receptor protein, alpha-7 chain
shegan	MOL000351	Rhamnazin	Nitric oxide synthase, inducible
shegan	MOL000351	Rhamnazin	Prostaglandin G/H synthase 1
shegan	MOL000351	Rhamnazin	Estrogen receptor
shegan	MOL000351	Rhamnazin	Androgen receptor
shegan	MOL000351	Rhamnazin	Sodium channel protein type 5 subunit alpha
shegan	MOL000351	Rhamnazin	Peroxisome proliferator activated receptor gamma
shegan	MOL000351	Rhamnazin	Prostaglandin G/H synthase 2
shegan	MOL000351	Rhamnazin	Estrogen receptor beta
shegan	MOL000351	Rhamnazin	Dipeptidyl peptidase IV
shegan	MOL000351	Rhamnazin	Mitogen-activated protein kinase 14
shegan	MOL000351	Rhamnazin	Glycogen synthase kinase-3 beta
shegan	MOL000351	Rhamnazin	Heat shock protein HSP 90
shegan	MOL000351	Rhamnazin	Cell division protein kinase 2
shegan	MOL000351	Rhamnazin	Trypsin-1
shegan	MOL000351	Rhamnazin	Proto-oncogene serine/threonine-protein kinase Pim-1
shegan	MOL000351	Rhamnazin	Cyclin-A2
shegan	MOL000351	Rhamnazin	Nuclear receptor coactivator 2
shegan	MOL000351	Rhamnazin	Calmodulin
shegan	MOL000351	Rhamnazin	Peroxisome proliferator activated receptor delta
shegan	MOL000351	Rhamnazin	Phosphatidylinositol-4,5-bisphosphate 3-kinase catalytic subunit, gamma isoform
shegan	MOL000351	Rhamnazin	Coagulation factor Xa
shegan	MOL000351	Rhamnazin	DNA topoisomerase II
shegan	MOL000351	Rhamnazin	Serine/threonine-protein kinase Chk1
shegan	MOL000354	isorhamnetin	Nitric oxide synthase, inducible
shegan	MOL000354	isorhamnetin	Prostaglandin G/H synthase 1
shegan	MOL000354	isorhamnetin	Estrogen receptor
shegan	MOL000354	isorhamnetin	Androgen receptor
shegan	MOL000354	isorhamnetin	Peroxisome proliferator activated receptor gamma
shegan	MOL000354	isorhamnetin	Prostaglandin G/H synthase 2
shegan	MOL000354	isorhamnetin	mRNA of Protein-tyrosine phosphatase, non-receptor type 1
shegan	MOL000354	isorhamnetin	Estrogen receptor beta
shegan	MOL000354	isorhamnetin	Dipeptidyl peptidase IV
shegan	MOL000354	isorhamnetin	Mitogen-activated protein kinase 14
shegan	MOL000354	isorhamnetin	Glycogen synthase kinase-3 beta
shegan	MOL000354	isorhamnetin	Heat shock protein HSP 90
shegan	MOL000354	isorhamnetin	Cell division protein kinase 2
shegan	MOL000354	isorhamnetin	Phosphatidylinositol-4,5-bisphosphate 3-kinase catalytic subunit, gamma isoform
shegan	MOL000354	isorhamnetin	mRNA of PKA Catalytic Subunit C-alpha
shegan	MOL000354	isorhamnetin	Trypsin-1
shegan	MOL000354	isorhamnetin	Proto-oncogene serine/threonine-protein kinase Pim-1
shegan	MOL000354	isorhamnetin	Cyclin-A2
shegan	MOL000354	isorhamnetin	Nuclear receptor coactivator 2
shegan	MOL000354	isorhamnetin	Calmodulin
shegan	MOL000354	isorhamnetin	Glycogen phosphorylase, muscle form
shegan	MOL000354	isorhamnetin	Peroxisome proliferator activated receptor delta
shegan	MOL000354	isorhamnetin	Serine/threonine-protein kinase Chk1
shegan	MOL000354	isorhamnetin	Aldose reductase
shegan	MOL000354	isorhamnetin	Nuclear receptor coactivator 1
shegan	MOL000354	isorhamnetin	Coagulation factor VII
shegan	MOL000354	isorhamnetin	Thrombin
shegan	MOL000354	isorhamnetin	Nitric-oxide synthase, endothelial
shegan	MOL000354	isorhamnetin	Acetylcholinesterase
shegan	MOL000354	isorhamnetin	Gamma-aminobutyric acid receptor subunit alpha-1
shegan	MOL000354	isorhamnetin	Amine oxidase [flavin-containing] B
shegan	MOL000354	isorhamnetin	Glutamate receptor 2
shegan	MOL000354	isorhamnetin	Cytochrome P450-cam
shegan	MOL000354	isorhamnetin	Transcription factor p65
shegan	MOL000354	isorhamnetin	Xanthine dehydrogenase/oxidase
shegan	MOL000354	isorhamnetin	Neutrophil cytosol factor 1
shegan	MOL000354	isorhamnetin	Oxidized low-density lipoprotein receptor 1
shegan	MOL003742	ardisianone A	Thrombin
shegan	MOL003753	dihydrokaempferide	Prostaglandin G/H synthase 1
shegan	MOL003753	dihydrokaempferide	Sodium channel protein type 5 subunit alpha
shegan	MOL003753	dihydrokaempferide	Prostaglandin G/H synthase 2
shegan	MOL003753	dihydrokaempferide	Heat shock protein HSP 90
shegan	MOL003753	dihydrokaempferide	Phosphatidylinositol-4,5-bisphosphate 3-kinase catalytic subunit, gamma isoform
shegan	MOL003753	dihydrokaempferide	mRNA of PKA Catalytic Subunit C-alpha
shegan	MOL003753	dihydrokaempferide	Nuclear receptor coactivator 2
shegan	MOL003753	dihydrokaempferide	Calmodulin
shegan	MOL003758	Iristectorigenin (9CI)	Nitric oxide synthase, inducible
shegan	MOL003758	Iristectorigenin (9CI)	Estrogen receptor
shegan	MOL003758	Iristectorigenin (9CI)	Androgen receptor
shegan	MOL003758	Iristectorigenin (9CI)	Sodium channel protein type 5 subunit alpha
shegan	MOL003758	Iristectorigenin (9CI)	Peroxisome proliferator activated receptor gamma
shegan	MOL003758	Iristectorigenin (9CI)	Prostaglandin G/H synthase 2
shegan	MOL003758	Iristectorigenin (9CI)	Coagulation factor VII
shegan	MOL003758	Iristectorigenin (9CI)	Estrogen receptor beta
shegan	MOL003758	Iristectorigenin (9CI)	Dipeptidyl peptidase IV
shegan	MOL003758	Iristectorigenin (9CI)	Mitogen-activated protein kinase 14
shegan	MOL003758	Iristectorigenin (9CI)	Glycogen synthase kinase-3 beta
shegan	MOL003758	Iristectorigenin (9CI)	Heat shock protein HSP 90
shegan	MOL003758	Iristectorigenin (9CI)	Cell division protein kinase 2
shegan	MOL003758	Iristectorigenin (9CI)	Trypsin-1
shegan	MOL003758	Iristectorigenin (9CI)	Proto-oncogene serine/threonine-protein kinase Pim-1
shegan	MOL003758	Iristectorigenin (9CI)	Nuclear receptor coactivator 2
shegan	MOL003758	Iristectorigenin (9CI)	Calmodulin
shegan	MOL003758	Iristectorigenin (9CI)	Coagulation factor Xa
shegan	MOL003758	Iristectorigenin (9CI)	Serine/threonine-protein kinase Chk1
shegan	MOL003758	Iristectorigenin (9CI)	DNA topoisomerase II
shegan	MOL003758	Iristectorigenin (9CI)	Acetylcholinesterase
shegan	MOL003759	Iristectorigenin A	Nitric oxide synthase, inducible
shegan	MOL003759	Iristectorigenin A	Prostaglandin G/H synthase 1
shegan	MOL003759	Iristectorigenin A	Estrogen receptor
shegan	MOL003759	Iristectorigenin A	Androgen receptor
shegan	MOL003759	Iristectorigenin A	Sodium channel protein type 5 subunit alpha
shegan	MOL003759	Iristectorigenin A	Peroxisome proliferator activated receptor gamma
shegan	MOL003759	Iristectorigenin A	Prostaglandin G/H synthase 2
shegan	MOL003759	Iristectorigenin A	Coagulation factor VII
shegan	MOL003759	Iristectorigenin A	Estrogen receptor beta
shegan	MOL003759	Iristectorigenin A	Dipeptidyl peptidase IV
shegan	MOL003759	Iristectorigenin A	Mitogen-activated protein kinase 14
shegan	MOL003759	Iristectorigenin A	Glycogen synthase kinase-3 beta
shegan	MOL003759	Iristectorigenin A	Heat shock protein HSP 90
shegan	MOL003759	Iristectorigenin A	Cell division protein kinase 2
shegan	MOL003759	Iristectorigenin A	Serine/threonine-protein kinase Chk1
shegan	MOL003759	Iristectorigenin A	Trypsin-1
shegan	MOL003759	Iristectorigenin A	Proto-oncogene serine/threonine-protein kinase Pim-1
shegan	MOL003759	Iristectorigenin A	Cyclin-A2
shegan	MOL003759	Iristectorigenin A	Nuclear receptor coactivator 2
shegan	MOL003759	Iristectorigenin A	Calmodulin
shegan	MOL003759	Iristectorigenin A	Beta-lactamase
shegan	MOL003759	Iristectorigenin A	DNA topoisomerase II
shegan	MOL003769	Irolone	Nitric oxide synthase, inducible
shegan	MOL003769	Irolone	Prostaglandin G/H synthase 1
shegan	MOL003769	Irolone	Androgen receptor
shegan	MOL003769	Irolone	Prostaglandin G/H synthase 2
shegan	MOL003769	Irolone	Estrogen receptor beta
shegan	MOL003769	Irolone	Dipeptidyl peptidase IV
shegan	MOL003769	Irolone	Heat shock protein HSP 90
shegan	MOL003769	Irolone	Cell division protein kinase 2
shegan	MOL003769	Irolone	Phosphatidylinositol-4,5-bisphosphate 3-kinase catalytic subunit, gamma isoform
shegan	MOL003769	Irolone	Serine/threonine-protein kinase Chk1
shegan	MOL003769	Irolone	mRNA of PKA Catalytic Subunit C-alpha
shegan	MOL003769	Irolone	Trypsin-1
shegan	MOL003769	Irolone	Calmodulin
shegan	MOL000006	luteolin	Prostaglandin G/H synthase 1
shegan	MOL000006	luteolin	Androgen receptor
shegan	MOL000006	luteolin	Prostaglandin G/H synthase 2
shegan	MOL000006	luteolin	Heat shock protein HSP 90
shegan	MOL000006	luteolin	Trypsin-1
shegan	MOL000006	luteolin	Nuclear receptor coactivator 2
shegan	MOL000006	luteolin	mRNA of PKA Catalytic Subunit C-alpha
shegan	MOL000006	luteolin	Dipeptidyl peptidase IV
shegan	MOL000006	luteolin	Phosphatidylinositol-4,5-bisphosphate 3-kinase catalytic subunit, gamma isoform
shegan	MOL000006	luteolin	Transcription factor p65
shegan	MOL000006	luteolin	Epidermal growth factor receptor
shegan	MOL000006	luteolin	RAC-alpha serine/threonine-protein kinase
shegan	MOL000006	luteolin	Vascular endothelial growth factor A
shegan	MOL000006	luteolin	G1/S-specific cyclin-D1
shegan	MOL000006	luteolin	Bcl-2-like protein 1
shegan	MOL000006	luteolin	Cyclin-dependent kinase inhibitor 1
shegan	MOL000006	luteolin	Caspase-9
shegan	MOL000006	luteolin	72 kDa type IV collagenase
shegan	MOL000006	luteolin	Matrix metalloproteinase-9
shegan	MOL000006	luteolin	Mitogen-activated protein kinase 1
shegan	MOL000006	luteolin	Interleukin-10
shegan	MOL000006	luteolin	Retinoblastoma-associated protein
shegan	MOL000006	luteolin	Cell division protein kinase 4
shegan	MOL000006	luteolin	Tumor necrosis factor
shegan	MOL000006	luteolin	Transcription factor AP-1
shegan	MOL000006	luteolin	Interleukin-6
shegan	MOL000006	luteolin	Caspase-3
shegan	MOL000006	luteolin	Cellular tumor antigen p53
shegan	MOL000006	luteolin	NF-kappa-B inhibitor alpha
shegan	MOL000006	luteolin	Xanthine dehydrogenase/oxidase
shegan	MOL000006	luteolin	DNA topoisomerase 1
shegan	MOL000006	luteolin	E3 ubiquitin-protein ligase Mdm2
shegan	MOL000006	luteolin	Amyloid beta A4 protein
shegan	MOL000006	luteolin	Interstitial collagenase
shegan	MOL000006	luteolin	Proliferating cell nuclear antigen
shegan	MOL000006	luteolin	Receptor tyrosine-protein kinase erbB-2
shegan	MOL000006	luteolin	Peroxisome proliferator-activated receptor gamma
shegan	MOL000006	luteolin	Heme oxygenase 1
shegan	MOL000006	luteolin	Caspase-7
shegan	MOL000006	luteolin	Intercellular adhesion molecule 1
shegan	MOL000006	luteolin	Induced myeloid leukemia cell differentiation protein Mcl-1
shegan	MOL000006	luteolin	Baculoviral IAP repeat-containing protein 5
shegan	MOL000006	luteolin	Interleukin-2
shegan	MOL000006	luteolin	G2/mitotic-specific cyclin-B1
shegan	MOL000006	luteolin	Tyrosinase
shegan	MOL000006	luteolin	Interferon gamma
shegan	MOL000006	luteolin	Interleukin-4
shegan	MOL000006	luteolin	DNA topoisomerase 2-alpha
shegan	MOL000006	luteolin	Glutathione S-transferase P
shegan	MOL000006	luteolin	Baculoviral IAP repeat-containing protein 4
shegan	MOL000006	luteolin	Solute carrier family 2, facilitated glucose transporter member 4
shegan	MOL000006	luteolin	Insulin receptor
shegan	MOL000006	luteolin	CD40 ligand
shegan	MOL000006	luteolin	Prostaglandin E synthase
shegan	MOL000006	luteolin	Kinetochore protein Nuf2
shegan	MOL000006	luteolin	Adenylate cyclase type 2
shegan	MOL000006	luteolin	Hepatocyte growth factor receptor
shudihuang	MOL000359	sitosterol	Progesterone receptor
shudihuang	MOL000359	sitosterol	Nuclear receptor coactivator 2
shudihuang	MOL000359	sitosterol	Mineralocorticoid receptor
shudihuang	MOL000449	Stigmasterol	Progesterone receptor
shudihuang	MOL000449	Stigmasterol	Mineralocorticoid receptor
shudihuang	MOL000449	Stigmasterol	Nuclear receptor coactivator 2
shudihuang	MOL000449	Stigmasterol	Alcohol dehydrogenase 1C
shudihuang	MOL000449	Stigmasterol	Ig gamma-1 chain C region
shudihuang	MOL000449	Stigmasterol	Retinoic acid receptor RXR-alpha
shudihuang	MOL000449	Stigmasterol	Nuclear receptor coactivator 1
shudihuang	MOL000449	Stigmasterol	Prostaglandin G/H synthase 1
shudihuang	MOL000449	Stigmasterol	Prostaglandin G/H synthase 2
shudihuang	MOL000449	Stigmasterol	Alpha-2A adrenergic receptor
shudihuang	MOL000449	Stigmasterol	Sodium-dependent noradrenaline transporter
shudihuang	MOL000449	Stigmasterol	Sodium-dependent dopamine transporter
shudihuang	MOL000449	Stigmasterol	Beta-2 adrenergic receptor
shudihuang	MOL000449	Stigmasterol	Aldose reductase
shudihuang	MOL000449	Stigmasterol	Urokinase-type plasminogen activator
shudihuang	MOL000449	Stigmasterol	Leukotriene A-4 hydrolase
shudihuang	MOL000449	Stigmasterol	Amine oxidase [flavin-containing] B
shudihuang	MOL000449	Stigmasterol	Amine oxidase [flavin-containing] A
shudihuang	MOL000449	Stigmasterol	mRNA of PKA Catalytic Subunit C-alpha
shudihuang	MOL000449	Stigmasterol	Chymotrypsinogen B
shudihuang	MOL000449	Stigmasterol	Muscarinic acetylcholine receptor M3
shudihuang	MOL000449	Stigmasterol	Muscarinic acetylcholine receptor M1
shudihuang	MOL000449	Stigmasterol	Beta-1 adrenergic receptor
shudihuang	MOL000449	Stigmasterol	Sodium channel protein type 5 subunit alpha
shudihuang	MOL000449	Stigmasterol	5-hydroxytryptamine 2A receptor
shudihuang	MOL000449	Stigmasterol	Alpha-1A adrenergic receptor
shudihuang	MOL000449	Stigmasterol	Gamma-aminobutyric-acid receptor alpha-3 subunit
shudihuang	MOL000449	Stigmasterol	Muscarinic acetylcholine receptor M2
shudihuang	MOL000449	Stigmasterol	Alpha-1B adrenergic receptor
shudihuang	MOL000449	Stigmasterol	Gamma-aminobutyric acid receptor subunit alpha-1
shudihuang	MOL000449	Stigmasterol	Neuronal acetylcholine receptor protein, alpha-7 chain
yimucao	MOL001418	galeopsin	Thrombin
yimucao	MOL001418	galeopsin	Muscarinic acetylcholine receptor M1
yimucao	MOL001418	galeopsin	Beta-1 adrenergic receptor
yimucao	MOL001418	galeopsin	Prostaglandin G/H synthase 2
yimucao	MOL001418	galeopsin	Alpha-2A adrenergic receptor
yimucao	MOL001418	galeopsin	Retinoic acid receptor RXR-alpha
yimucao	MOL001418	galeopsin	Acetylcholinesterase
yimucao	MOL001418	galeopsin	Sodium-dependent noradrenaline transporter
yimucao	MOL001418	galeopsin	Muscarinic acetylcholine receptor M2
yimucao	MOL001418	galeopsin	Alpha-2B adrenergic receptor
yimucao	MOL001418	galeopsin	Sodium-dependent dopamine transporter
yimucao	MOL001418	galeopsin	Beta-2 adrenergic receptor
yimucao	MOL001418	galeopsin	Sodium-dependent serotonin transporter
yimucao	MOL001418	galeopsin	Amine oxidase [flavin-containing] B
yimucao	MOL001420	ZINC04073977	Progesterone receptor
yimucao	MOL001420	ZINC04073977	Prostaglandin G/H synthase 2
yimucao	MOL001420	ZINC04073977	Gamma-aminobutyric acid receptor subunit alpha-1
yimucao	MOL001420	ZINC04073977	Alcohol dehydrogenase 1C
yimucao	MOL001420	ZINC04073977	Cytochrome P450-cam
yimucao	MOL001421	preleoheterin	Muscarinic acetylcholine receptor M3
yimucao	MOL001421	preleoheterin	Muscarinic acetylcholine receptor M1
yimucao	MOL001421	preleoheterin	Prostaglandin G/H synthase 2
yimucao	MOL001421	preleoheterin	CGMP-inhibited 3',5'-cyclic phosphodiesterase A
yimucao	MOL001421	preleoheterin	Sodium-dependent noradrenaline transporter
yimucao	MOL001421	preleoheterin	Alpha-1B adrenergic receptor
yimucao	MOL001421	preleoheterin	Beta-2 adrenergic receptor
yimucao	MOL001421	preleoheterin	Sodium-dependent serotonin transporter
yimucao	MOL001421	preleoheterin	Coagulation factor Xa
yimucao	MOL001421	preleoheterin	Heat shock protein HSP 90
yimucao	MOL001421	preleoheterin	mRNA of PKA Catalytic Subunit C-alpha
yimucao	MOL001421	preleoheterin	Calmodulin
yimucao	MOL001422	iso-preleoheterin	Prostaglandin G/H synthase 1
yimucao	MOL001422	iso-preleoheterin	Muscarinic acetylcholine receptor M1
yimucao	MOL001422	iso-preleoheterin	Prostaglandin G/H synthase 2
yimucao	MOL001422	iso-preleoheterin	Retinoic acid receptor RXR-alpha
yimucao	MOL001422	iso-preleoheterin	Sodium-dependent noradrenaline transporter
yimucao	MOL001422	iso-preleoheterin	Gamma-aminobutyric acid receptor subunit alpha-1
yimucao	MOL001422	iso-preleoheterin	Glutamate receptor 2
yimucao	MOL000098	quercetin	Prostaglandin G/H synthase 1
yimucao	MOL000098	quercetin	Androgen receptor
yimucao	MOL000098	quercetin	Peroxisome proliferator activated receptor gamma
yimucao	MOL000098	quercetin	Prostaglandin G/H synthase 2
yimucao	MOL000098	quercetin	Heat shock protein HSP 90
yimucao	MOL000098	quercetin	Phosphatidylinositol-4,5-bisphosphate 3-kinase catalytic subunit, gamma isoform
yimucao	MOL000098	quercetin	Nuclear receptor coactivator 2
yimucao	MOL000098	quercetin	Dipeptidyl peptidase IV
yimucao	MOL000098	quercetin	Aldose reductase
yimucao	MOL000098	quercetin	Trypsin-1
yimucao	MOL000098	quercetin	DNA topoisomerase II
yimucao	MOL000098	quercetin	Thrombin
yimucao	MOL000098	quercetin	Potassium voltage-gated channel subfamily H member 2
yimucao	MOL000098	quercetin	Sodium channel protein type 5 subunit alpha
yimucao	MOL000098	quercetin	Coagulation factor Xa
yimucao	MOL000098	quercetin	Beta-2 adrenergic receptor
yimucao	MOL000098	quercetin	Stromelysin-1
yimucao	MOL000098	quercetin	mRNA of PKA Catalytic Subunit C-alpha
yimucao	MOL000098	quercetin	Coagulation factor VII
yimucao	MOL000098	quercetin	Nitric-oxide synthase, endothelial
yimucao	MOL000098	quercetin	Retinoic acid receptor RXR-alpha
yimucao	MOL000098	quercetin	Acetylcholinesterase
yimucao	MOL000098	quercetin	Gamma-aminobutyric acid receptor subunit alpha-1
yimucao	MOL000098	quercetin	Amine oxidase [flavin-containing] B
yimucao	MOL000098	quercetin	Transcription factor p65
yimucao	MOL000098	quercetin	Epidermal growth factor receptor
yimucao	MOL000098	quercetin	RAC-alpha serine/threonine-protein kinase
yimucao	MOL000098	quercetin	Vascular endothelial growth factor A
yimucao	MOL000098	quercetin	G1/S-specific cyclin-D1
yimucao	MOL000098	quercetin	Apoptosis regulator Bcl-2
yimucao	MOL000098	quercetin	Bcl-2-like protein 1
yimucao	MOL000098	quercetin	Proto-oncogene c-Fos
yimucao	MOL000098	quercetin	Cyclin-dependent kinase inhibitor 1
yimucao	MOL000098	quercetin	Eukaryotic translation initiation factor 6
yimucao	MOL000098	quercetin	Apoptosis regulator BAX
yimucao	MOL000098	quercetin	Caspase-9
yimucao	MOL000098	quercetin	Urokinase-type plasminogen activator
yimucao	MOL000098	quercetin	72 kDa type IV collagenase
yimucao	MOL000098	quercetin	Matrix metalloproteinase-9
yimucao	MOL000098	quercetin	Mitogen-activated protein kinase 1
yimucao	MOL000098	quercetin	Interleukin-10
yimucao	MOL000098	quercetin	Pro-epidermal growth factor
yimucao	MOL000098	quercetin	Retinoblastoma-associated protein
yimucao	MOL000098	quercetin	Tumor necrosis factor
yimucao	MOL000098	quercetin	Transcription factor AP-1
yimucao	MOL000098	quercetin	Interleukin-6
yimucao	MOL000098	quercetin	Cyclin-dependent kinase inhibitor 2A, isoforms 1/2/3
yimucao	MOL000098	quercetin	Activator of 90 kDa heat shock protein ATPase homolog 1
yimucao	MOL000098	quercetin	Caspase-3
yimucao	MOL000098	quercetin	Cellular tumor antigen p53
yimucao	MOL000098	quercetin	ETS domain-containing protein Elk-1
yimucao	MOL000098	quercetin	NF-kappa-B inhibitor alpha
yimucao	MOL000098	quercetin	NADPH--cytochrome P450 reductase
yimucao	MOL000098	quercetin	Ornithine decarboxylase
yimucao	MOL000098	quercetin	Xanthine dehydrogenase/oxidase
yimucao	MOL000098	quercetin	Caspase-8
yimucao	MOL000098	quercetin	DNA topoisomerase 1
yimucao	MOL000098	quercetin	RAF proto-oncogene serine/threonine-protein kinase
yimucao	MOL000098	quercetin	Superoxide dismutase [Cu-Zn]
yimucao	MOL000098	quercetin	Protein kinase C alpha type
yimucao	MOL000098	quercetin	Interstitial collagenase
yimucao	MOL000098	quercetin	Hypoxia-inducible factor 1-alpha
yimucao	MOL000098	quercetin	Signal transducer and activator of transcription 1-alpha/beta
yimucao	MOL000098	quercetin	Protein CBFA2T1
yimucao	MOL000098	quercetin	Probable E3 ubiquitin-protein ligase HERC5
yimucao	MOL000098	quercetin	Cell division control protein 2 homolog
yimucao	MOL000098	quercetin	78 kDa glucose-regulated protein
yimucao	MOL000098	quercetin	Receptor tyrosine-protein kinase erbB-2
yimucao	MOL000098	quercetin	Peroxisome proliferator-activated receptor gamma
yimucao	MOL000098	quercetin	Acetyl-CoA carboxylase 1
yimucao	MOL000098	quercetin	Heme oxygenase 1
yimucao	MOL000098	quercetin	Cytochrome P450 3A4
yimucao	MOL000098	quercetin	Cytochrome P450 1A2
yimucao	MOL000098	quercetin	Caveolin-1
yimucao	MOL000098	quercetin	Myc proto-oncogene protein
yimucao	MOL000098	quercetin	Tissue factor
yimucao	MOL000098	quercetin	Gap junction alpha-1 protein
yimucao	MOL000098	quercetin	Cytochrome P450 1A1
yimucao	MOL000098	quercetin	Intercellular adhesion molecule 1
yimucao	MOL000098	quercetin	Interleukin-1 beta
yimucao	MOL000098	quercetin	C-C motif chemokine 2
yimucao	MOL000098	quercetin	E-selectin
yimucao	MOL000098	quercetin	Vascular cell adhesion protein 1
yimucao	MOL000098	quercetin	Prostaglandin E2 receptor EP3 subtype
yimucao	MOL000098	quercetin	Interleukin-8
yimucao	MOL000098	quercetin	Protein kinase C beta type
yimucao	MOL000098	quercetin	Baculoviral IAP repeat-containing protein 5
yimucao	MOL000098	quercetin	Dual oxidase 2
yimucao	MOL000098	quercetin	Nitric oxide synthase, endothelial
yimucao	MOL000098	quercetin	Heat shock protein beta-1
yimucao	MOL000098	quercetin	Transforming growth factor beta-1
yimucao	MOL000098	quercetin	Estrogen sulfotransferase
yimucao	MOL000098	quercetin	Maltase-glucoamylase, intestinal
yimucao	MOL000098	quercetin	Interleukin-2
yimucao	MOL000098	quercetin	Nuclear receptor subfamily 1 group I member 2
yimucao	MOL000098	quercetin	Cytochrome P450 1B1
yimucao	MOL000098	quercetin	G2/mitotic-specific cyclin-B1
yimucao	MOL000098	quercetin	Tissue-type plasminogen activator
yimucao	MOL000098	quercetin	Thrombomodulin
yimucao	MOL000098	quercetin	Plasminogen activator inhibitor 1
yimucao	MOL000098	quercetin	Collagen alpha-1(I) chain
yimucao	MOL000098	quercetin	Interferon gamma
yimucao	MOL000098	quercetin	Arachidonate 5-lipoxygenase
yimucao	MOL000098	quercetin	Phosphatidylinositol-3,4,5-trisphosphate 3-phosphatase and dual-specificity protein phosphatase PTEN
yimucao	MOL000098	quercetin	Interleukin-1 alpha
yimucao	MOL000098	quercetin	Myeloperoxidase
yimucao	MOL000098	quercetin	DNA topoisomerase 2-alpha
yimucao	MOL000098	quercetin	Neutrophil cytosol factor 1
yimucao	MOL000098	quercetin	ATP-binding cassette sub-family G member 2
yimucao	MOL000098	quercetin	Hyaluronan synthase 2
yimucao	MOL000098	quercetin	Glutathione S-transferase P
yimucao	MOL000098	quercetin	Nuclear factor erythroid 2-related factor 2
yimucao	MOL000098	quercetin	NAD(P)H dehydrogenase [quinone] 1
yimucao	MOL000098	quercetin	Poly [ADP-ribose] polymerase 1
yimucao	MOL000098	quercetin	Aryl hydrocarbon receptor
yimucao	MOL000098	quercetin	26S proteasome non-ATPase regulatory subunit 3
yimucao	MOL000098	quercetin	Solute carrier family 2, facilitated glucose transporter member 4
yimucao	MOL000098	quercetin	Collagen alpha-1(III) chain
yimucao	MOL000098	quercetin	DNA gyrase subunit B
yimucao	MOL000098	quercetin	C-X-C motif chemokine 11
yimucao	MOL000098	quercetin	C-X-C motif chemokine 2
yimucao	MOL000098	quercetin	DDB1- and CUL4-associated factor 5
yimucao	MOL000098	quercetin	Nuclear receptor subfamily 1 group I member 3
yimucao	MOL000098	quercetin	Serine/threonine-protein kinase Chk2
yimucao	MOL000098	quercetin	Insulin receptor
yimucao	MOL000098	quercetin	Claudin-4
yimucao	MOL000098	quercetin	Peroxisome proliferator-activated receptor alpha
yimucao	MOL000098	quercetin	Peroxisome proliferator-activated receptor delta
yimucao	MOL000098	quercetin	Heat shock factor protein 1
yimucao	MOL000098	quercetin	C-reactive protein
yimucao	MOL000098	quercetin	C-X-C motif chemokine 10
yimucao	MOL000098	quercetin	Inhibitor of nuclear factor kappa-B kinase subunit alpha
yimucao	MOL000098	quercetin	Osteopontin
yimucao	MOL000098	quercetin	Runt-related transcription factor 2
yimucao	MOL000098	quercetin	Ras association domain-containing protein 1
yimucao	MOL000098	quercetin	Transcription factor E2F1
yimucao	MOL000098	quercetin	Transcription factor E2F2
yimucao	MOL000098	quercetin	Prostatic acid phosphatase
yimucao	MOL000098	quercetin	Cathepsin D
yimucao	MOL000098	quercetin	Insulin-like growth factor-binding protein 3
yimucao	MOL000098	quercetin	Insulin-like growth factor II
yimucao	MOL000098	quercetin	CD40 ligand
yimucao	MOL000098	quercetin	Interferon regulatory factor 1
yimucao	MOL000098	quercetin	Receptor tyrosine-protein kinase erbB-3
yimucao	MOL000098	quercetin	Serum paraoxonase/arylesterase 1
yimucao	MOL000098	quercetin	Type I iodothyronine deiodinase
yimucao	MOL000098	quercetin	Procollagen C-endopeptidase enhancer 1
yimucao	MOL000098	quercetin	Puromycin-sensitive aminopeptidase
yimucao	MOL000098	quercetin	Hexokinase-2
yimucao	MOL000098	quercetin	Homeobox protein Nkx-3.1
yimucao	MOL000098	quercetin	Ras GTPase-activating protein 1
yimucao	MOL000098	quercetin	Peroxidase C1A
yimucao	MOL000098	quercetin	Glutathione S-transferase Mu 1
yimucao	MOL000098	quercetin	Glutathione S-transferase Mu 2
yimucao	MOL001439	arachidonic acid	Prostaglandin G/H synthase 1
yimucao	MOL001439	arachidonic acid	Prostaglandin G/H synthase 2
yimucao	MOL001439	arachidonic acid	Retinoic acid receptor RXR-alpha
yimucao	MOL001439	arachidonic acid	Transient receptor potential cation channel subfamily V member 1
yimucao	MOL001439	arachidonic acid	Retinoic acid receptor RXR-gamma
yimucao	MOL001439	arachidonic acid	Sodium-dependent noradrenaline transporter
yimucao	MOL001439	arachidonic acid	Transcription factor p65
yimucao	MOL001439	arachidonic acid	G1/S-specific cyclin-D1
yimucao	MOL001439	arachidonic acid	Mitogen-activated protein kinase 1
yimucao	MOL001439	arachidonic acid	Pro-epidermal growth factor
yimucao	MOL001439	arachidonic acid	Cell division protein kinase 4
yimucao	MOL001439	arachidonic acid	Caspase-3
yimucao	MOL001439	arachidonic acid	Probable E3 ubiquitin-protein ligase HERC5
yimucao	MOL001439	arachidonic acid	Peroxisome proliferator-activated receptor gamma
yimucao	MOL001439	arachidonic acid	Glucose-6-phosphate 1-dehydrogenase
yimucao	MOL001439	arachidonic acid	Tumor necrosis factor receptor superfamily member 1A
yimucao	MOL001439	arachidonic acid	Protein kinase C beta type
yimucao	MOL001439	arachidonic acid	Platelet endothelial cell adhesion molecule
yimucao	MOL001439	arachidonic acid	Nitric oxide synthase, endothelial
yimucao	MOL001439	arachidonic acid	Arachidonate 5-lipoxygenase
yimucao	MOL001439	arachidonic acid	Cytosolic phospholipase A2
yimucao	MOL001439	arachidonic acid	Phosphatidylinositol-3,4,5-trisphosphate 3-phosphatase and dual-specificity protein phosphatase PTEN
yimucao	MOL001439	arachidonic acid	P-selectin
yimucao	MOL001439	arachidonic acid	Prostaglandin E synthase
yimucao	MOL001439	arachidonic acid	Beta-galactosidase
yimucao	MOL001439	arachidonic acid	Aldehyde dehydrogenase, mitochondrial
yimucao	MOL001439	arachidonic acid	ATP-binding cassette sub-family A member 1
yimucao	MOL001439	arachidonic acid	Aldehyde dehydrogenase, dimeric NADP-preferring
yimucao	MOL001439	arachidonic acid	Mitochondrial uncoupling protein 2
yimucao	MOL001439	arachidonic acid	Complement C1r subcomponent
yimucao	MOL001439	arachidonic acid	Cholesteryl ester transfer protein
yimucao	MOL001439	arachidonic acid	ATP-binding cassette sub-family G member 1
yimucao	MOL001439	arachidonic acid	Multidrug resistance-associated protein 4
yimucao	MOL001439	arachidonic acid	Potassium channel subfamily K member 10
yimucao	MOL001439	arachidonic acid	Tumor necrosis factor receptor superfamily member 1B
yimucao	MOL001439	arachidonic acid	Prostaglandin E synthase 2
yimucao	MOL001439	arachidonic acid	Potassium channel subfamily K member 2
yimucao	MOL001439	arachidonic acid	Collagen alpha-2(I) chain
yimucao	MOL000354	isorhamnetin	Nitric oxide synthase, inducible
yimucao	MOL000354	isorhamnetin	Prostaglandin G/H synthase 1
yimucao	MOL000354	isorhamnetin	Estrogen receptor
yimucao	MOL000354	isorhamnetin	Androgen receptor
yimucao	MOL000354	isorhamnetin	Peroxisome proliferator activated receptor gamma
yimucao	MOL000354	isorhamnetin	Prostaglandin G/H synthase 2
yimucao	MOL000354	isorhamnetin	mRNA of Protein-tyrosine phosphatase, non-receptor type 1
yimucao	MOL000354	isorhamnetin	Estrogen receptor beta
yimucao	MOL000354	isorhamnetin	Dipeptidyl peptidase IV
yimucao	MOL000354	isorhamnetin	Mitogen-activated protein kinase 14
yimucao	MOL000354	isorhamnetin	Glycogen synthase kinase-3 beta
yimucao	MOL000354	isorhamnetin	Heat shock protein HSP 90
yimucao	MOL000354	isorhamnetin	Cell division protein kinase 2
yimucao	MOL000354	isorhamnetin	Phosphatidylinositol-4,5-bisphosphate 3-kinase catalytic subunit, gamma isoform
yimucao	MOL000354	isorhamnetin	mRNA of PKA Catalytic Subunit C-alpha
yimucao	MOL000354	isorhamnetin	Trypsin-1
yimucao	MOL000354	isorhamnetin	Proto-oncogene serine/threonine-protein kinase Pim-1
yimucao	MOL000354	isorhamnetin	Cyclin-A2
yimucao	MOL000354	isorhamnetin	Nuclear receptor coactivator 2
yimucao	MOL000354	isorhamnetin	Calmodulin
yimucao	MOL000354	isorhamnetin	Glycogen phosphorylase, muscle form
yimucao	MOL000354	isorhamnetin	Peroxisome proliferator activated receptor delta
yimucao	MOL000354	isorhamnetin	Serine/threonine-protein kinase Chk1
yimucao	MOL000354	isorhamnetin	Aldose reductase
yimucao	MOL000354	isorhamnetin	Nuclear receptor coactivator 1
yimucao	MOL000354	isorhamnetin	Coagulation factor VII
yimucao	MOL000354	isorhamnetin	Thrombin
yimucao	MOL000354	isorhamnetin	Nitric-oxide synthase, endothelial
yimucao	MOL000354	isorhamnetin	Acetylcholinesterase
yimucao	MOL000354	isorhamnetin	Gamma-aminobutyric acid receptor subunit alpha-1
yimucao	MOL000354	isorhamnetin	Amine oxidase [flavin-containing] B
yimucao	MOL000354	isorhamnetin	Glutamate receptor 2
yimucao	MOL000354	isorhamnetin	Cytochrome P450-cam
yimucao	MOL000354	isorhamnetin	Transcription factor p65
yimucao	MOL000354	isorhamnetin	Xanthine dehydrogenase/oxidase
yimucao	MOL000354	isorhamnetin	Neutrophil cytosol factor 1
yimucao	MOL000354	isorhamnetin	Oxidized low-density lipoprotein receptor 1
yimucao	MOL000422	kaempferol	Nitric oxide synthase, inducible
yimucao	MOL000422	kaempferol	Prostaglandin G/H synthase 1
yimucao	MOL000422	kaempferol	Androgen receptor
yimucao	MOL000422	kaempferol	Peroxisome proliferator activated receptor gamma
yimucao	MOL000422	kaempferol	Prostaglandin G/H synthase 2
yimucao	MOL000422	kaempferol	Heat shock protein HSP 90
yimucao	MOL000422	kaempferol	Phosphatidylinositol-4,5-bisphosphate 3-kinase catalytic subunit, gamma isoform
yimucao	MOL000422	kaempferol	mRNA of PKA Catalytic Subunit C-alpha
yimucao	MOL000422	kaempferol	Nuclear receptor coactivator 2
yimucao	MOL000422	kaempferol	Dipeptidyl peptidase IV
yimucao	MOL000422	kaempferol	Trypsin-1
yimucao	MOL000422	kaempferol	Progesterone receptor
yimucao	MOL000422	kaempferol	Thrombin
yimucao	MOL000422	kaempferol	Muscarinic acetylcholine receptor M1
yimucao	MOL000422	kaempferol	Nitric-oxide synthase, endothelial
yimucao	MOL000422	kaempferol	Gamma-aminobutyric-acid receptor alpha-2 subunit
yimucao	MOL000422	kaempferol	Acetylcholinesterase
yimucao	MOL000422	kaempferol	Sodium-dependent noradrenaline transporter
yimucao	MOL000422	kaempferol	Muscarinic acetylcholine receptor M2
yimucao	MOL000422	kaempferol	Alpha-1B adrenergic receptor
yimucao	MOL000422	kaempferol	Gamma-aminobutyric acid receptor subunit alpha-1
yimucao	MOL000422	kaempferol	DNA topoisomerase II
yimucao	MOL000422	kaempferol	Coagulation factor VII
yimucao	MOL000422	kaempferol	Calmodulin
yimucao	MOL000422	kaempferol	Transcription factor p65
yimucao	MOL000422	kaempferol	Inhibitor of nuclear factor kappa-B kinase subunit beta
yimucao	MOL000422	kaempferol	RAC-alpha serine/threonine-protein kinase
yimucao	MOL000422	kaempferol	Apoptosis regulator Bcl-2
yimucao	MOL000422	kaempferol	Apoptosis regulator BAX
yimucao	MOL000422	kaempferol	Tumor necrosis factor
yimucao	MOL000422	kaempferol	Transcription factor AP-1
yimucao	MOL000422	kaempferol	Activator of 90 kDa heat shock protein ATPase homolog 1
yimucao	MOL000422	kaempferol	Caspase-3
yimucao	MOL000422	kaempferol	Mitogen-activated protein kinase 8
yimucao	MOL000422	kaempferol	Xanthine dehydrogenase/oxidase
yimucao	MOL000422	kaempferol	Interstitial collagenase
yimucao	MOL000422	kaempferol	Signal transducer and activator of transcription 1-alpha/beta
yimucao	MOL000422	kaempferol	Cell division control protein 2 homolog
yimucao	MOL000422	kaempferol	Peroxisome proliferator-activated receptor gamma
yimucao	MOL000422	kaempferol	Heme oxygenase 1
yimucao	MOL000422	kaempferol	Cytochrome P450 3A4
yimucao	MOL000422	kaempferol	Cytochrome P450 1A2
yimucao	MOL000422	kaempferol	Cytochrome P450 1A1
yimucao	MOL000422	kaempferol	Intercellular adhesion molecule 1
yimucao	MOL000422	kaempferol	E-selectin
yimucao	MOL000422	kaempferol	Vascular cell adhesion protein 1
yimucao	MOL000422	kaempferol	Nuclear receptor subfamily 1 group I member 2
yimucao	MOL000422	kaempferol	Cytochrome P450 1B1
yimucao	MOL000422	kaempferol	Arachidonate 5-lipoxygenase
yimucao	MOL000422	kaempferol	Hyaluronan synthase 2
yimucao	MOL000422	kaempferol	Glutathione S-transferase P
yimucao	MOL000422	kaempferol	Aryl hydrocarbon receptor
yimucao	MOL000422	kaempferol	26S proteasome non-ATPase regulatory subunit 3
yimucao	MOL000422	kaempferol	Solute carrier family 2, facilitated glucose transporter member 4
yimucao	MOL000422	kaempferol	Nuclear receptor subfamily 1 group I member 3
yimucao	MOL000422	kaempferol	Insulin receptor
yimucao	MOL000422	kaempferol	Type I iodothyronine deiodinase
yimucao	MOL000422	kaempferol	Serine/threonine-protein phosphatase 2B catalytic subunit alpha isoform
yimucao	MOL000422	kaempferol	Peroxidase C1A
yimucao	MOL000422	kaempferol	Glutathione S-transferase Mu 1
yimucao	MOL000422	kaempferol	Glutathione S-transferase Mu 2
yimucao	MOL000422	kaempferol	Aldo-keto reductase family 1 member C3
yimucao	MOL000422	kaempferol	Antileukoproteinase
