# Supplementary material for: Therapeutic targets and signaling pathways of active components of QiLing decoction against castration-resistant prostate cancer based on network pharmacology
Source: PeerJ. 2022 Jun 27;10:e13481. doi: 10.7717/peerj.13481 (PMC9245566; doi:10.7717/peerj.13481)
Supplement: Supplemental Information 2 — GO enrichment analyses were used to explore the gene function of potential targets of active components of QLD, including the potential biological processes (BP), cellular components (CC), and molecular functions (MF). [file peerj-10-13481-s002.xls]

## Sheet: Sheet1
ONTOLOGY	ID	Description	GeneRatio	BgRatio	pvalue	p.adjust	qvalue	geneID	Count
BP	GO:1903799	negative regulation of production of miRNAs involved in gene silencing by miRNA	2021-03-05	14/18866	3.25e-09	3.7e-06	8.08e-07	TP53/IL6/ESR1	3
BP	GO:0060965	negative regulation of gene silencing by miRNA	2021-03-05	20/18866	1.02e-08	3.7e-06	8.08e-07	TP53/IL6/ESR1	3
BP	GO:0060149	negative regulation of posttranscriptional gene silencing	2021-03-05	23/18866	1.58e-08	3.7e-06	8.08e-07	TP53/IL6/ESR1	3
BP	GO:0060967	negative regulation of gene silencing by RNA	2021-03-05	23/18866	1.58e-08	3.7e-06	8.08e-07	TP53/IL6/ESR1	3
BP	GO:1903798	regulation of production of miRNAs involved in gene silencing by miRNA	2021-03-05	23/18866	1.58e-08	3.7e-06	8.08e-07	TP53/IL6/ESR1	3
BP	GO:0070920	regulation of production of small RNA involved in gene silencing by RNA	2021-03-05	25/18866	2.05e-08	4.01e-06	8.75e-07	TP53/IL6/ESR1	3
BP	GO:0046545	development of primary female sexual characteristics	2021-03-05	105/18866	1.66e-06	0.000149811	3.27e-05	VEGFA/CASP3/ESR1	3
BP	GO:0071887	leukocyte apoptotic process	2021-03-05	108/18866	1.81e-06	0.000151464	3.31e-05	TP53/IL6/CASP3	3
BP	GO:0060964	regulation of gene silencing by miRNA	2021-03-05	116/18866	2.24e-06	0.000161899	3.53e-05	TP53/IL6/ESR1	3
BP	GO:0060969	negative regulation of gene silencing	2021-03-05	37/18866	6.93e-08	1.16e-05	2.53e-06	TP53/IL6/ESR1	3
BP	GO:0035196	production of miRNAs involved in gene silencing by miRNA	2021-03-05	49/18866	1.64e-07	2.4e-05	5.25e-06	TP53/IL6/ESR1	3
BP	GO:0031050	dsRNA processing	2021-03-05	54/18866	2.21e-07	2.59e-05	5.65e-06	TP53/IL6/ESR1	3
BP	GO:0070918	production of small RNA involved in gene silencing by RNA	2021-03-05	54/18866	2.21e-07	2.59e-05	5.65e-06	TP53/IL6/ESR1	3
BP	GO:0097194	execution phase of apoptosis	2021-03-05	95/18866	1.23e-06	0.000130833	2.86e-05	TP53/IL6/CASP3	3
BP	GO:0008585	female gonad development	2021-03-05	100/18866	1.43e-06	0.000140049	3.06e-05	VEGFA/CASP3/ESR1	3
BP	GO:0046660	female sex differentiation	2021-03-05	119/18866	2.42e-06	0.000161899	3.53e-05	VEGFA/CASP3/ESR1	3
BP	GO:0060147	regulation of posttranscriptional gene silencing	2021-03-05	120/18866	2.49e-06	0.000161899	3.53e-05	TP53/IL6/ESR1	3
BP	GO:0060966	regulation of gene silencing by RNA	2021-03-05	120/18866	2.49e-06	0.000161899	3.53e-05	TP53/IL6/ESR1	3
BP	GO:0045899	positive regulation of RNA polymerase II transcription preinitiation complex assembly	2021-02-05	11/18866	3.09e-06	0.000180942	3.95e-05	TP53/ESR1	2
BP	GO:1903800	positive regulation of production of miRNAs involved in gene silencing by miRNA	2021-02-05	11/18866	3.09e-06	0.000180942	3.95e-05	TP53/IL6	2
BP	GO:0060968	regulation of gene silencing	2021-03-05	140/18866	3.96e-06	0.000220809	4.82e-05	TP53/IL6/ESR1	3
BP	GO:0045898	regulation of RNA polymerase II transcription preinitiation complex assembly	2021-02-05	14/18866	5.11e-06	0.000268569	5.86e-05	TP53/ESR1	2
BP	GO:0002262	myeloid cell homeostasis	2021-03-05	154/18866	5.27e-06	0.000268569	5.86e-05	IL6/VEGFA/CASP3	3
BP	GO:0034349	glial cell apoptotic process	2021-02-05	15/18866	5.89e-06	0.00027623	6.03e-05	TP53/CASP3	2
BP	GO:1900119	positive regulation of execution phase of apoptosis	2021-02-05	15/18866	5.89e-06	0.00027623	6.03e-05	TP53/IL6	2
BP	GO:0031065	positive regulation of histone deacetylation	2021-02-05	17/18866	7.63e-06	0.00034395	7.51e-05	TP53/VEGFA	2
BP	GO:0060749	mammary gland alveolus development	2021-02-05	19/18866	9.59e-06	0.000401491	8.76e-05	VEGFA/ESR1	2
BP	GO:0061377	mammary gland lobule development	2021-02-05	19/18866	9.59e-06	0.000401491	8.76e-05	VEGFA/ESR1	2
BP	GO:0042098	T cell proliferation	2021-03-05	195/18866	1.07e-05	0.000418384	9.13e-05	TP53/IL6/CASP3	3
BP	GO:0050731	positive regulation of peptidyl-tyrosine phosphorylation	2021-03-05	195/18866	1.07e-05	0.000418384	9.13e-05	TP53/IL6/VEGFA	3
BP	GO:0090312	positive regulation of protein deacetylation	2021-02-05	21/18866	1.18e-05	0.00044525	9.72e-05	TP53/VEGFA	2
BP	GO:1901522	positive regulation of transcription from RNA polymerase II promoter involved in cellular response to chemical stimulus	2021-02-05	23/18866	1.42e-05	0.000519546	0.000113391	TP53/VEGFA	2
BP	GO:0036003	positive regulation of transcription from RNA polymerase II promoter in response to stress	2021-02-05	24/18866	1.55e-05	0.000533381	0.000116411	TP53/VEGFA	2
BP	GO:2000637	positive regulation of gene silencing by miRNA	2021-02-05	24/18866	1.55e-05	0.000533381	0.000116411	TP53/IL6	2
BP	GO:0008406	gonad development	2021-03-05	223/18866	1.6e-05	0.000536179	0.000117021	VEGFA/CASP3/ESR1	3
BP	GO:0060148	positive regulation of posttranscriptional gene silencing	2021-02-05	25/18866	1.68e-05	0.000547437	0.000119478	TP53/IL6	2
BP	GO:0045137	development of primary sexual characteristics	2021-03-05	229/18866	1.73e-05	0.000547437	0.000119478	VEGFA/CASP3/ESR1	3
BP	GO:0006309	apoptotic DNA fragmentation	2021-02-05	26/18866	1.82e-05	0.000547437	0.000119478	IL6/CASP3	2
BP	GO:0051123	RNA polymerase II preinitiation complex assembly	2021-02-05	26/18866	1.82e-05	0.000547437	0.000119478	TP53/ESR1	2
BP	GO:0002360	T cell lineage commitment	2021-02-05	28/18866	2.12e-05	0.000620662	0.00013546	TP53/IL6	2
BP	GO:0031063	regulation of histone deacetylation	2021-02-05	29/18866	2.27e-05	0.000650309	0.00014193	TP53/VEGFA	2
BP	GO:0048872	homeostasis of number of cells	2021-03-05	256/18866	2.42e-05	0.000667403	0.000145661	IL6/VEGFA/CASP3	3
BP	GO:0031334	positive regulation of protein-containing complex assembly	2021-03-05	257/18866	2.45e-05	0.000667403	0.000145661	TP53/VEGFA/ESR1	3
BP	GO:0060261	positive regulation of transcription initiation from RNA polymerase II promoter	2021-02-05	31/18866	2.61e-05	0.000683312	0.000149133	TP53/ESR1	2
BP	GO:0050730	regulation of peptidyl-tyrosine phosphorylation	2021-03-05	263/18866	2.62e-05	0.000683312	0.000149133	TP53/IL6/VEGFA	3
BP	GO:0010165	response to X-ray	2021-02-05	32/18866	2.78e-05	0.00070769	0.000154454	TP53/CASP3	2
BP	GO:0051091	positive regulation of DNA-binding transcription factor activity	2021-03-05	270/18866	2.84e-05	0.00070769	0.000154454	IL6/VEGFA/ESR1	3
BP	GO:0045165	cell fate commitment	2021-03-05	278/18866	3.1e-05	0.000713091	0.000155632	TP53/IL6/CASP3	3
BP	GO:0000737	DNA catabolic process, endonucleolytic	2021-02-05	34/18866	3.14e-05	0.000713091	0.000155632	IL6/CASP3	2
BP	GO:0035633	maintenance of blood-brain barrier	2021-02-05	34/18866	3.14e-05	0.000713091	0.000155632	IL6/VEGFA	2
BP	GO:1902692	regulation of neuroblast proliferation	2021-02-05	34/18866	3.14e-05	0.000713091	0.000155632	TP53/VEGFA	2
BP	GO:0007548	sex differentiation	2021-03-05	280/18866	3.16e-05	0.000713091	0.000155632	VEGFA/CASP3/ESR1	3
BP	GO:0046651	lymphocyte proliferation	2021-03-05	283/18866	3.27e-05	0.000718288	0.000156767	TP53/IL6/CASP3	3
BP	GO:0030262	apoptotic nuclear changes	2021-02-05	35/18866	3.33e-05	0.000718288	0.000156767	IL6/CASP3	2
BP	GO:0032943	mononuclear cell proliferation	2021-03-05	286/18866	3.37e-05	0.000718288	0.000156767	TP53/IL6/CASP3	3
BP	GO:0006921	cellular component disassembly involved in execution phase of apoptosis	2021-02-05	37/18866	3.73e-05	0.000753451	0.000164441	IL6/CASP3	2
BP	GO:0060260	regulation of transcription initiation from RNA polymerase II promoter	2021-02-05	37/18866	3.73e-05	0.000753451	0.000164441	TP53/ESR1	2
BP	GO:0070897	transcription preinitiation complex assembly	2021-02-05	37/18866	3.73e-05	0.000753451	0.000164441	TP53/ESR1	2
BP	GO:2000144	positive regulation of DNA-templated transcription, initiation	2021-02-05	38/18866	3.94e-05	0.000781746	0.000170616	TP53/ESR1	2
BP	GO:0048511	rhythmic process	2021-03-05	305/18866	4.08e-05	0.000797872	0.000174136	TP53/CASP3/ESR1	3
BP	GO:0070661	leukocyte proliferation	2021-03-05	313/18866	4.41e-05	0.000847849	0.000185043	TP53/IL6/CASP3	3
BP	GO:1900117	regulation of execution phase of apoptosis	2021-02-05	41/18866	4.59e-05	0.000867454	0.000189322	TP53/IL6	2
BP	GO:0006308	DNA catabolic process	2021-02-05	43/18866	5.05e-05	0.000929232	0.000202805	IL6/CASP3	2
BP	GO:0042113	B cell activation	2021-03-05	328/18866	5.07e-05	0.000929232	0.000202805	TP53/IL6/CASP3	3
BP	GO:0060562	epithelial tube morphogenesis	2021-03-05	331/18866	5.21e-05	0.000940122	0.000205182	VEGFA/CASP3/ESR1	3
BP	GO:0090311	regulation of protein deacetylation	2021-02-05	45/18866	5.54e-05	0.000983402	0.000214628	TP53/VEGFA	2
BP	GO:2000142	regulation of DNA-templated transcription, initiation	2021-02-05	46/18866	5.79e-05	0.000997964	0.000217806	TP53/ESR1	2
BP	GO:0010721	negative regulation of cell development	2021-03-05	343/18866	5.8e-05	0.000997964	0.000217806	TP53/IL6/VEGFA	3
BP	GO:0048545	response to steroid hormone	2021-03-05	346/18866	5.95e-05	0.000997964	0.000217806	IL6/CASP3/ESR1	3
BP	GO:0022602	ovulation cycle process	2021-02-05	47/18866	6.05e-05	0.000997964	0.000217806	CASP3/ESR1	2
BP	GO:0046677	response to antibiotic	2021-02-05	47/18866	6.05e-05	0.000997964	0.000217806	TP53/CASP3	2
BP	GO:0001666	response to hypoxia	2021-03-05	359/18866	6.64e-05	0.00107523	0.00023467	TP53/VEGFA/CASP3	3
BP	GO:0062197	cellular response to chemical stress	2021-03-05	360/18866	6.7e-05	0.00107523	0.00023467	TP53/IL6/CASP3	3
BP	GO:0036293	response to decreased oxygen levels	2021-03-05	371/18866	7.33e-05	0.00116019	0.000253213	TP53/VEGFA/CASP3	3
BP	GO:0018108	peptidyl-tyrosine phosphorylation	2021-03-05	374/18866	7.5e-05	0.00117251	0.000255901	TP53/IL6/VEGFA	3
BP	GO:0018212	peptidyl-tyrosine modification	2021-03-05	377/18866	7.68e-05	0.00118494	0.000258614	TP53/IL6/VEGFA	3
BP	GO:0060688	regulation of morphogenesis of a branching structure	2021-02-05	56/18866	8.6e-05	0.00130967	0.000285837	VEGFA/ESR1	2
BP	GO:0070482	response to oxygen levels	2021-03-05	396/18866	8.89e-05	0.00132279	0.0002887	TP53/VEGFA/CASP3	3
BP	GO:0001541	ovarian follicle development	2021-02-05	57/18866	8.92e-05	0.00132279	0.0002887	VEGFA/ESR1	2
BP	GO:0043525	positive regulation of neuron apoptotic process	2021-02-05	59/18866	9.56e-05	0.00140008	0.000305569	TP53/CASP3	2
BP	GO:0007405	neuroblast proliferation	2021-02-05	62/18866	0.000105589	0.00152779	0.00033344	TP53/VEGFA	2
BP	GO:0022407	regulation of cell-cell adhesion	2021-03-05	439/18866	0.000120856	0.00172736	0.000376997	IL6/VEGFA/CASP3	3
BP	GO:0048608	reproductive structure development	2021-03-05	443/18866	0.000124157	0.00173229	0.000378074	VEGFA/CASP3/ESR1	3
BP	GO:0048732	gland development	2021-03-05	443/18866	0.000124157	0.00173229	0.000378074	IL6/VEGFA/ESR1	3
BP	GO:0061458	reproductive system development	2021-03-05	447/18866	0.000127518	0.00175824	0.000383737	VEGFA/CASP3/ESR1	3
BP	GO:0043254	regulation of protein-containing complex assembly	2021-03-05	449/18866	0.00012922	0.001761	0.000384338	TP53/VEGFA/ESR1	3
BP	GO:0042698	ovulation cycle	2021-02-05	69/18866	0.000130898	0.00176336	0.000384855	CASP3/ESR1	2
BP	GO:0050673	epithelial cell proliferation	2021-03-05	453/18866	0.000132669	0.00176691	0.00038563	IL6/VEGFA/ESR1	3
BP	GO:0051090	regulation of DNA-binding transcription factor activity	2021-03-05	455/18866	0.000134416	0.00177007	0.000386318	IL6/VEGFA/ESR1	3
BP	GO:0006979	response to oxidative stress	2021-03-05	458/18866	0.000137065	0.0017849	0.000389555	TP53/IL6/CASP3	3
BP	GO:0072091	regulation of stem cell proliferation	2021-02-05	76/18866	0.000158901	0.00204448	0.000446208	TP53/VEGFA	2
BP	GO:0042110	T cell activation	2021-03-05	483/18866	0.000160488	0.00204448	0.000446208	TP53/IL6/CASP3	3
BP	GO:0061418	regulation of transcription from RNA polymerase II promoter in response to hypoxia	2021-02-05	77/18866	0.000163121	0.00205568	0.000448653	TP53/VEGFA	2
BP	GO:0016575	histone deacetylation	2021-02-05	79/18866	0.000171726	0.00214109	0.000467294	TP53/VEGFA	2
BP	GO:0048145	regulation of fibroblast proliferation	2021-02-05	83/18866	0.000189593	0.00233898	0.000510482	TP53/ESR1	2
BP	GO:0048144	fibroblast proliferation	2021-02-05	84/18866	0.000194196	0.00237081	0.000517431	TP53/ESR1	2
BP	GO:0006970	response to osmotic stress	2021-02-05	85/18866	0.000198855	0.00240266	0.00052438	TP53/CASP3	2
BP	GO:0001776	leukocyte homeostasis	2021-02-05	86/18866	0.000203568	0.0024345	0.000531331	IL6/CASP3	2
BP	GO:0034103	regulation of tissue remodeling	2021-02-05	91/18866	0.000227952	0.0026716	0.000583078	TP53/IL6	2
BP	GO:2000177	regulation of neural precursor cell proliferation	2021-02-05	91/18866	0.000227952	0.0026716	0.000583078	TP53/VEGFA	2
BP	GO:0031058	positive regulation of histone modification	2021-02-05	92/18866	0.000232993	0.00270365	0.000590072	TP53/VEGFA	2
BP	GO:0002690	positive regulation of leukocyte chemotaxis	2021-02-05	96/18866	0.000253702	0.00291509	0.000636219	IL6/VEGFA	2
BP	GO:0006476	protein deacetylation	2021-02-05	97/18866	0.000259016	0.00291891	0.000637053	TP53/VEGFA	2
BP	GO:1901216	positive regulation of neuron death	2021-02-05	97/18866	0.000259016	0.00291891	0.000637053	TP53/CASP3	2
BP	GO:1905269	positive regulation of chromatin organization	2021-02-05	106/18866	0.000309288	0.00345224	0.000753453	TP53/VEGFA	2
BP	GO:0035601	protein deacylation	2021-02-05	107/18866	0.000315146	0.00348444	0.000760481	TP53/VEGFA	2
BP	GO:0002286	T cell activation involved in immune response	2021-02-05	109/18866	0.000327024	0.00351626	0.000767425	TP53/IL6	2
BP	GO:0033138	positive regulation of peptidyl-serine phosphorylation	2021-02-05	109/18866	0.000327024	0.00351626	0.000767425	IL6/VEGFA	2
BP	GO:0043618	regulation of transcription from RNA polymerase II promoter in response to stress	2021-02-05	109/18866	0.000327024	0.00351626	0.000767425	TP53/VEGFA	2
BP	GO:0098732	macromolecule deacylation	2021-02-05	111/18866	0.000339119	0.00361316	0.000788574	TP53/VEGFA	2
BP	GO:0043620	regulation of DNA-templated transcription in response to stress	2021-02-05	115/18866	0.000363961	0.00384291	0.000838716	TP53/VEGFA	2
BP	GO:0030218	erythrocyte differentiation	2021-02-05	121/18866	0.000402849	0.00421552	0.000920039	VEGFA/CASP3	2
BP	GO:0002688	regulation of leukocyte chemotaxis	2021-02-05	124/18866	0.000423022	0.00434897	0.000949164	IL6/VEGFA	2
BP	GO:0022612	gland morphogenesis	2021-02-05	124/18866	0.000423022	0.00434897	0.000949164	IL6/ESR1	2
BP	GO:0072089	stem cell proliferation	2021-02-05	128/18866	0.000450677	0.00459299	0.00100242	TP53/VEGFA	2
BP	GO:0034101	erythrocyte homeostasis	2021-02-05	129/18866	0.000457726	0.00462461	0.00100932	VEGFA/CASP3	2
BP	GO:0001101	response to acid chemical	2021-02-05	132/18866	0.000479195	0.00480014	0.00104763	VEGFA/CASP3	2
BP	GO:0030183	B cell differentiation	2021-02-05	137/18866	0.000516054	0.00512556	0.00111866	TP53/IL6	2
BP	GO:0009411	response to UV	2021-02-05	140/18866	0.000538816	0.00530665	0.00115818	TP53/CASP3	2
BP	GO:0032355	response to estradiol	2021-02-05	141/18866	0.00054651	0.00532452	0.00116208	CASP3/ESR1	2
BP	GO:0002687	positive regulation of leukocyte migration	2021-02-05	142/18866	0.000554258	0.00532452	0.00116208	IL6/VEGFA	2
BP	GO:0030879	mammary gland development	2021-02-05	142/18866	0.000554258	0.00532452	0.00116208	VEGFA/ESR1	2
BP	GO:0010212	response to ionizing radiation	2021-02-05	144/18866	0.000569916	0.00538663	0.00117563	TP53/CASP3	2
BP	GO:0050921	positive regulation of chemotaxis	2021-02-05	144/18866	0.000569916	0.00538663	0.00117563	IL6/VEGFA	2
BP	GO:0033135	regulation of peptidyl-serine phosphorylation	2021-02-05	145/18866	0.000577825	0.00541769	0.00118241	IL6/VEGFA	2
BP	GO:0042542	response to hydrogen peroxide	2021-02-05	146/18866	0.000585788	0.00544876	0.0011892	IL6/CASP3	2
BP	GO:0051384	response to glucocorticoid	2021-02-05	147/18866	0.000593805	0.00547984	0.00119598	IL6/CASP3	2
BP	GO:0031056	regulation of histone modification	2021-02-05	149/18866	0.000609999	0.0055853	0.001219	TP53/VEGFA	2
BP	GO:0035148	tube formation	2021-02-05	150/18866	0.000618177	0.0056163	0.00122576	VEGFA/CASP3	2
BP	GO:0061351	neural precursor cell proliferation	2021-02-05	154/18866	0.000651422	0.00587282	0.00128174	TP53/VEGFA	2
BP	GO:0048754	branching morphogenesis of an epithelial tube	2021-02-05	155/18866	0.000659867	0.00590354	0.00128845	VEGFA/ESR1	2
BP	GO:0031960	response to corticosteroid	2021-02-05	164/18866	0.000738277	0.006555	0.00143063	IL6/CASP3	2
BP	GO:0034250	positive regulation of cellular amide metabolic process	2021-02-05	167/18866	0.000765374	0.00669417	0.001461	IL6/CASP3	2
BP	GO:0042129	regulation of T cell proliferation	2021-02-05	167/18866	0.000765374	0.00669417	0.001461	IL6/CASP3	2
BP	GO:2000241	regulation of reproductive process	2021-02-05	170/18866	0.00079295	0.00688398	0.00150243	VEGFA/ESR1	2
BP	GO:0016241	regulation of macroautophagy	2021-02-05	176/18866	0.000849539	0.00732103	0.00159782	TP53/CASP3	2
BP	GO:0048771	tissue remodeling	2021-02-05	178/18866	0.000868827	0.0074326	0.00162217	TP53/IL6	2
BP	GO:1905330	regulation of morphogenesis of an epithelium	2021-02-05	181/18866	0.000898158	0.00762783	0.00166478	VEGFA/ESR1	2
BP	GO:2001252	positive regulation of chromosome organization	2021-02-05	182/18866	0.00090804	0.00765628	0.00167099	TP53/VEGFA	2
BP	GO:0002285	lymphocyte activation involved in immune response	2021-02-05	187/18866	0.000958249	0.00796502	0.00173837	TP53/IL6	2
BP	GO:0061138	morphogenesis of a branching epithelium	2021-02-05	187/18866	0.000958249	0.00796502	0.00173837	VEGFA/ESR1	2
BP	GO:0006367	transcription initiation from RNA polymerase II promoter	2021-02-05	189/18866	0.000978703	0.00807775	0.00176297	TP53/ESR1	2
BP	GO:0022408	negative regulation of cell-cell adhesion	2021-02-05	191/18866	0.000999369	0.00819063	0.00178761	VEGFA/CASP3	2
BP	GO:0050864	regulation of B cell activation	2021-02-05	195/18866	0.00104133	0.00841685	0.00183698	IL6/CASP3	2
BP	GO:1902275	regulation of chromatin organization	2021-02-05	195/18866	0.00104133	0.00841685	0.00183698	TP53/VEGFA	2
BP	GO:0007565	female pregnancy	2021-02-05	196/18866	0.00105196	0.00844448	0.00184301	VEGFA/ESR1	2
BP	GO:0001763	morphogenesis of a branching structure	2021-02-05	201/18866	0.00110586	0.00881683	0.00192428	VEGFA/ESR1	2
BP	GO:0071456	cellular response to hypoxia	2021-02-05	208/18866	0.00118355	0.00937241	0.00204553	TP53/VEGFA	2
BP	GO:0002685	regulation of leukocyte migration	2021-02-05	212/18866	0.00122909	0.00966777	0.00210999	IL6/VEGFA	2
BP	GO:0043523	regulation of neuron apoptotic process	2021-02-05	214/18866	0.00125218	0.00978371	0.0021353	TP53/CASP3	2
BP	GO:0036294	cellular response to decreased oxygen levels	2021-02-05	218/18866	0.00129899	0.0100822	0.00220045	TP53/VEGFA	2
BP	GO:0050670	regulation of lymphocyte proliferation	2021-02-05	219/18866	0.00131082	0.0101071	0.00220588	IL6/CASP3	2
BP	GO:0002064	epithelial cell development	2021-02-05	221/18866	0.00133464	0.0101571	0.0022168	VEGFA/ESR1	2
BP	GO:0032944	regulation of mononuclear cell proliferation	2021-02-05	221/18866	0.00133464	0.0101571	0.0022168	IL6/CASP3	2
BP	GO:0097529	myeloid leukocyte migration	2021-02-05	222/18866	0.00134663	0.0101823	0.00222229	IL6/VEGFA	2
BP	GO:0044706	multi-multicellular organism process	2021-02-05	226/18866	0.00139511	0.0104812	0.00228753	VEGFA/ESR1	2
BP	GO:0050920	regulation of chemotaxis	2021-02-05	229/18866	0.00143202	0.01069	0.0023331	IL6/VEGFA	2
BP	GO:0030595	leukocyte chemotaxis	2021-02-05	232/18866	0.0014694	0.0108996	0.00237884	IL6/VEGFA	2
BP	GO:0000302	response to reactive oxygen species	2021-02-05	235/18866	0.00150725	0.0110406	0.00240961	IL6/CASP3	2
BP	GO:0071453	cellular response to oxygen levels	2021-02-05	235/18866	0.00150725	0.0110406	0.00240961	TP53/VEGFA	2
BP	GO:0060560	developmental growth involved in morphogenesis	2021-02-05	236/18866	0.00151997	0.0110646	0.00241486	VEGFA/ESR1	2
BP	GO:0070663	regulation of leukocyte proliferation	2021-02-05	240/18866	0.00157137	0.0113682	0.00248111	IL6/CASP3	2
BP	GO:0065004	protein-DNA complex assembly	2021-02-05	243/18866	0.00161047	0.0115796	0.00252725	TP53/ESR1	2
BP	GO:0051402	neuron apoptotic process	2021-02-05	245/18866	0.00163679	0.0116971	0.00255289	TP53/CASP3	2
BP	GO:0071216	cellular response to biotic stimulus	2021-02-05	246/18866	0.00165003	0.0117202	0.00255795	TP53/IL6	2
BP	GO:0006352	DNA-templated transcription, initiation	2021-02-05	249/18866	0.00169007	0.0119323	0.00260422	TP53/ESR1	2
BP	GO:0030217	T cell differentiation	2021-02-05	253/18866	0.00174417	0.0122405	0.00267149	TP53/IL6	2
BP	GO:2000027	regulation of animal organ morphogenesis	2021-02-05	254/18866	0.00175782	0.0122629	0.00267638	VEGFA/ESR1	2
BP	GO:0003007	heart morphogenesis	2021-02-05	258/18866	0.00181296	0.0125727	0.002744	TP53/VEGFA	2
BP	GO:0001894	tissue homeostasis	2021-02-05	261/18866	0.00185486	0.0127876	0.0027909	IL6/VEGFA	2
BP	GO:0048863	stem cell differentiation	2021-02-05	264/18866	0.00189722	0.0130031	0.00283794	TP53/ESR1	2
BP	GO:0071824	protein-DNA complex subunit organization	2021-02-05	282/18866	0.00216111	0.0147257	0.0032139	TP53/ESR1	2
BP	GO:0016579	protein deubiquitination	2021-02-05	283/18866	0.00217626	0.0147432	0.00321772	TP53/ESR1	2
BP	GO:0097193	intrinsic apoptotic signaling pathway	2021-02-05	290/18866	0.00228374	0.0153824	0.00335723	TP53/CASP3	2
BP	GO:0050768	negative regulation of neurogenesis	2021-02-05	295/18866	0.00236205	0.0156565	0.00341703	TP53/IL6	2
BP	GO:0051146	striated muscle cell differentiation	2021-02-05	295/18866	0.00236205	0.0156565	0.00341703	VEGFA/CASP3	2
BP	GO:0031647	regulation of protein stability	2021-02-05	296/18866	0.00237786	0.0156565	0.00341703	TP53/CASP3	2
BP	GO:0051348	negative regulation of transferase activity	2021-02-05	296/18866	0.00237786	0.0156565	0.00341703	TP53/CASP3	2
BP	GO:0070646	protein modification by small protein removal	2021-02-05	300/18866	0.00244163	0.0158728	0.00346425	TP53/ESR1	2
BP	GO:0007162	negative regulation of cell adhesion	2021-02-05	301/18866	0.0024577	0.0158728	0.00346425	VEGFA/CASP3	2
BP	GO:0016236	macroautophagy	2021-02-05	310/18866	0.00260461	0.0158728	0.00346425	TP53/CASP3	2
BP	GO:0018105	peptidyl-serine phosphorylation	2021-02-05	310/18866	0.00260461	0.0158728	0.00346425	IL6/VEGFA	2
BP	GO:0034599	cellular response to oxidative stress	2021-02-05	310/18866	0.00260461	0.0158728	0.00346425	TP53/IL6	2
BP	GO:0060326	cell chemotaxis	2021-02-05	311/18866	0.00262119	0.0158728	0.00346425	IL6/VEGFA	2
BP	GO:0010749	regulation of nitric oxide mediated signal transduction	2021-01-05	10/18866	0.00264774	0.0158728	0.00346425	VEGFA	1
BP	GO:0032025	response to cobalt ion	2021-01-05	10/18866	0.00264774	0.0158728	0.00346425	CASP3	1
BP	GO:0048739	cardiac muscle fiber development	2021-01-05	10/18866	0.00264774	0.0158728	0.00346425	VEGFA	1
BP	GO:0060068	vagina development	2021-01-05	10/18866	0.00264774	0.0158728	0.00346425	ESR1	1
BP	GO:0070091	glucagon secretion	2021-01-05	10/18866	0.00264774	0.0158728	0.00346425	IL6	1
BP	GO:0070092	regulation of glucagon secretion	2021-01-05	10/18866	0.00264774	0.0158728	0.00346425	IL6	1
BP	GO:0090037	positive regulation of protein kinase C signaling	2021-01-05	10/18866	0.00264774	0.0158728	0.00346425	VEGFA	1
BP	GO:0097050	type B pancreatic cell apoptotic process	2021-01-05	10/18866	0.00264774	0.0158728	0.00346425	IL6	1
BP	GO:1901725	regulation of histone deacetylase activity	2021-01-05	10/18866	0.00264774	0.0158728	0.00346425	VEGFA	1
BP	GO:2000048	negative regulation of cell-cell adhesion mediated by cadherin	2021-01-05	10/18866	0.00264774	0.0158728	0.00346425	VEGFA	1
BP	GO:2000659	regulation of interleukin-1-mediated signaling pathway	2021-01-05	10/18866	0.00264774	0.0158728	0.00346425	IL6	1
BP	GO:0090305	nucleic acid phosphodiester bond hydrolysis	2021-02-05	313/18866	0.0026545	0.0158728	0.00346425	IL6/CASP3	2
BP	GO:0009416	response to light stimulus	2021-02-05	319/18866	0.00275564	0.0163112	0.00355992	TP53/CASP3	2
BP	GO:0051961	negative regulation of nervous system development	2021-02-05	319/18866	0.00275564	0.0163112	0.00355992	TP53/IL6	2
BP	GO:0034612	response to tumor necrosis factor	2021-02-05	320/18866	0.00277268	0.0163295	0.00356393	TP53/CASP3	2
BP	GO:1901214	regulation of neuron death	2021-02-05	321/18866	0.00278976	0.016348	0.00356796	TP53/CASP3	2
BP	GO:0043471	regulation of cellular carbohydrate catabolic process	2021-01-05	11/18866	0.00291221	0.0163825	0.0035755	TP53	1
BP	GO:0048875	chemical homeostasis within a tissue	2021-01-05	11/18866	0.00291221	0.0163825	0.0035755	VEGFA	1
BP	GO:0051024	positive regulation of immunoglobulin secretion	2021-01-05	11/18866	0.00291221	0.0163825	0.0035755	IL6	1
BP	GO:0051974	negative regulation of telomerase activity	2021-01-05	11/18866	0.00291221	0.0163825	0.0035755	TP53	1
BP	GO:0060525	prostate glandular acinus development	2021-01-05	11/18866	0.00291221	0.0163825	0.0035755	ESR1	1
BP	GO:0060947	cardiac vascular smooth muscle cell differentiation	2021-01-05	11/18866	0.00291221	0.0163825	0.0035755	VEGFA	1
BP	GO:1990440	positive regulation of transcription from RNA polymerase II promoter in response to endoplasmic reticulum stress	2021-01-05	11/18866	0.00291221	0.0163825	0.0035755	TP53	1
BP	GO:2000551	regulation of T-helper 2 cell cytokine production	2021-01-05	11/18866	0.00291221	0.0163825	0.0035755	IL6	1
BP	GO:1903037	regulation of leukocyte cell-cell adhesion	2021-02-05	329/18866	0.00292827	0.0163825	0.0035755	IL6/CASP3	2
BP	GO:0001655	urogenital system development	2021-02-05	330/18866	0.00294581	0.0163825	0.0035755	VEGFA/ESR1	2
BP	GO:0071214	cellular response to abiotic stimulus	2021-02-05	331/18866	0.0029634	0.0163825	0.0035755	TP53/CASP3	2
BP	GO:0104004	cellular response to environmental stimulus	2021-02-05	331/18866	0.0029634	0.0163825	0.0035755	TP53/CASP3	2
BP	GO:0050863	regulation of T cell activation	2021-02-05	332/18866	0.00298104	0.0164027	0.0035799	IL6/CASP3	2
BP	GO:0018209	peptidyl-serine modification	2021-02-05	333/18866	0.00299873	0.0164229	0.00358431	IL6/VEGFA	2
BP	GO:0032496	response to lipopolysaccharide	2021-02-05	334/18866	0.00301647	0.0164433	0.00358875	IL6/CASP3	2
BP	GO:0002551	mast cell chemotaxis	2021-01-05	12/18866	0.00317662	0.0164734	0.00359533	VEGFA	1
BP	GO:0006983	ER overload response	2021-01-05	12/18866	0.00317662	0.0164734	0.00359533	TP53	1
BP	GO:0032494	response to peptidoglycan	2021-01-05	12/18866	0.00317662	0.0164734	0.00359533	IL6	1
BP	GO:0051095	regulation of helicase activity	2021-01-05	12/18866	0.00317662	0.0164734	0.00359533	TP53	1
BP	GO:0060442	branching involved in prostate gland morphogenesis	2021-01-05	12/18866	0.00317662	0.0164734	0.00359533	ESR1	1
BP	GO:0060736	prostate gland growth	2021-01-05	12/18866	0.00317662	0.0164734	0.00359533	ESR1	1
BP	GO:0070243	regulation of thymocyte apoptotic process	2021-01-05	12/18866	0.00317662	0.0164734	0.00359533	TP53	1
BP	GO:0071679	commissural neuron axon guidance	2021-01-05	12/18866	0.00317662	0.0164734	0.00359533	VEGFA	1
BP	GO:0072540	T-helper 17 cell lineage commitment	2021-01-05	12/18866	0.00317662	0.0164734	0.00359533	IL6	1
BP	GO:0150065	regulation of deacetylase activity	2021-01-05	12/18866	0.00317662	0.0164734	0.00359533	VEGFA	1
BP	GO:1902510	regulation of apoptotic DNA fragmentation	2021-01-05	12/18866	0.00317662	0.0164734	0.00359533	IL6	1
BP	GO:0010506	regulation of autophagy	2021-02-05	347/18866	0.0032517	0.0167885	0.0036641	TP53/CASP3	2
BP	GO:0051222	positive regulation of protein transport	2021-02-05	354/18866	0.00338187	0.0173082	0.00377753	TP53/IL6	2
BP	GO:0002237	response to molecule of bacterial origin	2021-02-05	356/18866	0.00341952	0.0173082	0.00377753	IL6/CASP3	2
BP	GO:0033044	regulation of chromosome organization	2021-02-05	356/18866	0.00341952	0.0173082	0.00377753	TP53/VEGFA	2
BP	GO:0031053	primary miRNA processing	2021-01-05	13/18866	0.00344097	0.0173082	0.00377753	IL6	1
BP	GO:0045602	negative regulation of endothelial cell differentiation	2021-01-05	13/18866	0.00344097	0.0173082	0.00377753	VEGFA	1
BP	GO:0097531	mast cell migration	2021-01-05	13/18866	0.00344097	0.0173082	0.00377753	VEGFA	1
BP	GO:0070997	neuron death	2021-02-05	360/18866	0.0034954	0.0175069	0.00382089	TP53/CASP3	2
BP	GO:0007159	leukocyte cell-cell adhesion	2021-02-05	364/18866	0.00357209	0.0176527	0.00385272	IL6/CASP3	2
BP	GO:0051052	regulation of DNA metabolic process	2021-02-05	365/18866	0.00359139	0.0176527	0.00385272	TP53/IL6	2
BP	GO:0030098	lymphocyte differentiation	2021-02-05	368/18866	0.00364957	0.0176527	0.00385272	TP53/IL6	2
BP	GO:0045861	negative regulation of proteolysis	2021-02-05	369/18866	0.00366907	0.0176527	0.00385272	TP53/VEGFA	2
BP	GO:1904951	positive regulation of establishment of protein localization	2021-02-05	370/18866	0.00368862	0.0176527	0.00385272	TP53/IL6	2
BP	GO:0032042	mitochondrial DNA metabolic process	2021-01-05	14/18866	0.00370527	0.0176527	0.00385272	TP53	1
BP	GO:0046007	negative regulation of activated T cell proliferation	2021-01-05	14/18866	0.00370527	0.0176527	0.00385272	CASP3	1
BP	GO:0050930	induction of positive chemotaxis	2021-01-05	14/18866	0.00370527	0.0176527	0.00385272	VEGFA	1
BP	GO:0070234	positive regulation of T cell apoptotic process	2021-01-05	14/18866	0.00370527	0.0176527	0.00385272	TP53	1
BP	GO:0071236	cellular response to antibiotic	2021-01-05	14/18866	0.00370527	0.0176527	0.00385272	TP53	1
BP	GO:0090399	replicative senescence	2021-01-05	14/18866	0.00370527	0.0176527	0.00385272	TP53	1
BP	GO:1903624	regulation of DNA catabolic process	2021-01-05	14/18866	0.00370527	0.0176527	0.00385272	IL6	1
BP	GO:0001701	in utero embryonic development	2021-02-05	383/18866	0.00394723	0.0182442	0.0039818	TP53/VEGFA	2
BP	GO:0006089	lactate metabolic process	2021-01-05	15/18866	0.00396951	0.0182442	0.0039818	TP53	1
BP	GO:0035745	T-helper 2 cell cytokine production	2021-01-05	15/18866	0.00396951	0.0182442	0.0039818	IL6	1
BP	GO:0045779	negative regulation of bone resorption	2021-01-05	15/18866	0.00396951	0.0182442	0.0039818	IL6	1
BP	GO:0048569	post-embryonic animal organ development	2021-01-05	15/18866	0.00396951	0.0182442	0.0039818	VEGFA	1
BP	GO:0060841	venous blood vessel development	2021-01-05	15/18866	0.00396951	0.0182442	0.0039818	VEGFA	1
BP	GO:1901550	regulation of endothelial cell development	2021-01-05	15/18866	0.00396951	0.0182442	0.0039818	VEGFA	1
BP	GO:1903140	regulation of establishment of endothelial barrier	2021-01-05	15/18866	0.00396951	0.0182442	0.0039818	VEGFA	1
BP	GO:2001028	positive regulation of endothelial cell chemotaxis	2021-01-05	15/18866	0.00396951	0.0182442	0.0039818	VEGFA	1
BP	GO:0042692	muscle cell differentiation	2021-02-05	390/18866	0.00408996	0.01866	0.00407255	VEGFA/CASP3	2
BP	GO:0001780	neutrophil homeostasis	2021-01-05	16/18866	0.00423369	0.01866	0.00407255	IL6	1
BP	GO:0002295	T-helper cell lineage commitment	2021-01-05	16/18866	0.00423369	0.01866	0.00407255	IL6	1
BP	GO:0002830	positive regulation of type 2 immune response	2021-01-05	16/18866	0.00423369	0.01866	0.00407255	IL6	1
BP	GO:0006098	pentose-phosphate shunt	2021-01-05	16/18866	0.00423369	0.01866	0.00407255	TP53	1
BP	GO:0010225	response to UV-C	2021-01-05	16/18866	0.00423369	0.01866	0.00407255	TP53	1
BP	GO:0043116	negative regulation of vascular permeability	2021-01-05	16/18866	0.00423369	0.01866	0.00407255	VEGFA	1
BP	GO:0061450	trophoblast cell migration	2021-01-05	16/18866	0.00423369	0.01866	0.00407255	VEGFA	1
BP	GO:0071391	cellular response to estrogen stimulus	2021-01-05	16/18866	0.00423369	0.01866	0.00407255	ESR1	1
BP	GO:1901163	regulation of trophoblast cell migration	2021-01-05	16/18866	0.00423369	0.01866	0.00407255	VEGFA	1
BP	GO:0042493	response to drug	2021-02-05	397/18866	0.00423512	0.01866	0.00407255	TP53/CASP3	2
BP	GO:0045765	regulation of angiogenesis	2021-02-05	403/18866	0.00436146	0.018962	0.00413847	IL6/VEGFA	2
BP	GO:0006978	DNA damage response, signal transduction by p53 class mediator resulting in transcription of p21 class mediator	2021-01-05	17/18866	0.00449782	0.018962	0.00413847	TP53	1
BP	GO:0008340	determination of adult lifespan	2021-01-05	17/18866	0.00449782	0.018962	0.00413847	TP53	1
BP	GO:0009299	mRNA transcription	2021-01-05	17/18866	0.00449782	0.018962	0.00413847	TP53	1
BP	GO:0010715	regulation of extracellular matrix disassembly	2021-01-05	17/18866	0.00449782	0.018962	0.00413847	IL6	1
BP	GO:0030540	female genitalia development	2021-01-05	17/18866	0.00449782	0.018962	0.00413847	ESR1	1
BP	GO:0030889	negative regulation of B cell proliferation	2021-01-05	17/18866	0.00449782	0.018962	0.00413847	CASP3	1
BP	GO:0032966	negative regulation of collagen biosynthetic process	2021-01-05	17/18866	0.00449782	0.018962	0.00413847	IL6	1
BP	GO:0043117	positive regulation of vascular permeability	2021-01-05	17/18866	0.00449782	0.018962	0.00413847	VEGFA	1
BP	GO:0046851	negative regulation of bone remodeling	2021-01-05	17/18866	0.00449782	0.018962	0.00413847	IL6	1
BP	GO:0070242	thymocyte apoptotic process	2021-01-05	17/18866	0.00449782	0.018962	0.00413847	TP53	1
BP	GO:0071850	mitotic cell cycle arrest	2021-01-05	17/18866	0.00449782	0.018962	0.00413847	TP53	1
BP	GO:0001558	regulation of cell growth	2021-02-05	420/18866	0.00472903	0.0191785	0.00418571	TP53/VEGFA	2
BP	GO:0006740	NADPH regeneration	2021-01-05	18/18866	0.0047619	0.0191785	0.00418571	TP53	1
BP	GO:0010713	negative regulation of collagen metabolic process	2021-01-05	18/18866	0.0047619	0.0191785	0.00418571	IL6	1
BP	GO:0032740	positive regulation of interleukin-17 production	2021-01-05	18/18866	0.0047619	0.0191785	0.00418571	IL6	1
BP	GO:0032780	negative regulation of ATPase activity	2021-01-05	18/18866	0.0047619	0.0191785	0.00418571	TP53	1
BP	GO:0042772	DNA damage response, signal transduction resulting in transcription	2021-01-05	18/18866	0.0047619	0.0191785	0.00418571	TP53	1
BP	GO:0051023	regulation of immunoglobulin secretion	2021-01-05	18/18866	0.0047619	0.0191785	0.00418571	IL6	1
BP	GO:0060977	coronary vasculature morphogenesis	2021-01-05	18/18866	0.0047619	0.0191785	0.00418571	VEGFA	1
BP	GO:0070230	positive regulation of lymphocyte apoptotic process	2021-01-05	18/18866	0.0047619	0.0191785	0.00418571	TP53	1
BP	GO:0090036	regulation of protein kinase C signaling	2021-01-05	18/18866	0.0047619	0.0191785	0.00418571	VEGFA	1
BP	GO:0090190	positive regulation of branching involved in ureteric bud morphogenesis	2021-01-05	18/18866	0.0047619	0.0191785	0.00418571	VEGFA	1
BP	GO:0150078	positive regulation of neuroinflammatory response	2021-01-05	18/18866	0.0047619	0.0191785	0.00418571	IL6	1
BP	GO:1901524	regulation of mitophagy	2021-01-05	18/18866	0.0047619	0.0191785	0.00418571	TP53	1
BP	GO:0050727	regulation of inflammatory response	2021-02-05	425/18866	0.00483984	0.0194257	0.00423966	IL6/ESR1	2
BP	GO:0045785	positive regulation of cell adhesion	2021-02-05	428/18866	0.00490691	0.0196276	0.00428374	IL6/VEGFA	2
BP	GO:0030099	myeloid cell differentiation	2021-02-05	431/18866	0.00497442	0.0196346	0.00428525	VEGFA/CASP3	2
BP	GO:0010663	positive regulation of striated muscle cell apoptotic process	2021-01-05	19/18866	0.00502591	0.0196346	0.00428525	TP53	1
BP	GO:0010666	positive regulation of cardiac muscle cell apoptotic process	2021-01-05	19/18866	0.00502591	0.0196346	0.00428525	TP53	1
BP	GO:0043373	CD4-positive, alpha-beta T cell lineage commitment	2021-01-05	19/18866	0.00502591	0.0196346	0.00428525	IL6	1
BP	GO:0060252	positive regulation of glial cell proliferation	2021-01-05	19/18866	0.00502591	0.0196346	0.00428525	IL6	1
BP	GO:0060602	branch elongation of an epithelium	2021-01-05	19/18866	0.00502591	0.0196346	0.00428525	ESR1	1
BP	GO:2000647	negative regulation of stem cell proliferation	2021-01-05	19/18866	0.00502591	0.0196346	0.00428525	TP53	1
BP	GO:1901342	regulation of vasculature development	2021-02-05	444/18866	0.00527203	0.0202606	0.00442188	IL6/VEGFA	2
BP	GO:0002726	positive regulation of T cell cytokine production	2021-01-05	20/18866	0.00528987	0.0202606	0.00442188	IL6	1
BP	GO:0031290	retinal ganglion cell axon guidance	2021-01-05	20/18866	0.00528987	0.0202606	0.00442188	VEGFA	1
BP	GO:0032793	positive regulation of CREB transcription factor activity	2021-01-05	20/18866	0.00528987	0.0202606	0.00442188	VEGFA	1
BP	GO:0036303	lymph vessel morphogenesis	2021-01-05	20/18866	0.00528987	0.0202606	0.00442188	VEGFA	1
BP	GO:1902004	positive regulation of amyloid-beta formation	2021-01-05	20/18866	0.00528987	0.0202606	0.00442188	CASP3	1
BP	GO:0009314	response to radiation	2021-02-05	447/18866	0.00534188	0.0202773	0.00442554	TP53/CASP3	2
BP	GO:0048568	embryonic organ development	2021-02-05	451/18866	0.00543568	0.0202773	0.00442554	TP53/VEGFA	2
BP	GO:0002363	alpha-beta T cell lineage commitment	2021-01-05	21/18866	0.00555378	0.0202773	0.00442554	IL6	1
BP	GO:0030220	platelet formation	2021-01-05	21/18866	0.00555378	0.0202773	0.00442554	CASP3	1
BP	GO:0046827	positive regulation of protein export from nucleus	2021-01-05	21/18866	0.00555378	0.0202773	0.00442554	TP53	1
BP	GO:0048305	immunoglobulin secretion	2021-01-05	21/18866	0.00555378	0.0202773	0.00442554	IL6	1
BP	GO:0060065	uterus development	2021-01-05	21/18866	0.00555378	0.0202773	0.00442554	ESR1	1
BP	GO:0061042	vascular wound healing	2021-01-05	21/18866	0.00555378	0.0202773	0.00442554	VEGFA	1
BP	GO:0061213	positive regulation of mesonephros development	2021-01-05	21/18866	0.00555378	0.0202773	0.00442554	VEGFA	1
BP	GO:0072574	hepatocyte proliferation	2021-01-05	21/18866	0.00555378	0.0202773	0.00442554	IL6	1
BP	GO:0072575	epithelial cell proliferation involved in liver morphogenesis	2021-01-05	21/18866	0.00555378	0.0202773	0.00442554	IL6	1
BP	GO:1903055	positive regulation of extracellular matrix organization	2021-01-05	21/18866	0.00555378	0.0202773	0.00442554	IL6	1
BP	GO:1903978	regulation of microglial cell activation	2021-01-05	21/18866	0.00555378	0.0202773	0.00442554	IL6	1
BP	GO:2000047	regulation of cell-cell adhesion mediated by cadherin	2021-01-05	21/18866	0.00555378	0.0202773	0.00442554	VEGFA	1
BP	GO:2000269	regulation of fibroblast apoptotic process	2021-01-05	21/18866	0.00555378	0.0202773	0.00442554	TP53	1
BP	GO:0002313	mature B cell differentiation involved in immune response	2021-01-05	22/18866	0.00581763	0.0207242	0.00452306	IL6	1
BP	GO:0006925	inflammatory cell apoptotic process	2021-01-05	22/18866	0.00581763	0.0207242	0.00452306	IL6	1
BP	GO:0010888	negative regulation of lipid storage	2021-01-05	22/18866	0.00581763	0.0207242	0.00452306	IL6	1
BP	GO:0034104	negative regulation of tissue remodeling	2021-01-05	22/18866	0.00581763	0.0207242	0.00452306	IL6	1
BP	GO:0036344	platelet morphogenesis	2021-01-05	22/18866	0.00581763	0.0207242	0.00452306	CASP3	1
BP	GO:0043369	CD4-positive or CD8-positive, alpha-beta T cell lineage commitment	2021-01-05	22/18866	0.00581763	0.0207242	0.00452306	IL6	1
BP	GO:0072576	liver morphogenesis	2021-01-05	22/18866	0.00581763	0.0207242	0.00452306	IL6	1
BP	GO:0090189	regulation of branching involved in ureteric bud morphogenesis	2021-01-05	22/18866	0.00581763	0.0207242	0.00452306	VEGFA	1
BP	GO:0016570	histone modification	2021-02-05	468/18866	0.00584299	0.0207515	0.00452902	TP53/VEGFA	2
BP	GO:0060249	anatomical structure homeostasis	2021-02-05	469/18866	0.00586739	0.0207752	0.00453419	IL6/VEGFA	2
BP	GO:0051346	negative regulation of hydrolase activity	2021-02-05	473/18866	0.00596544	0.0207797	0.00453517	TP53/VEGFA	2
BP	GO:0000002	mitochondrial genome maintenance	2021-01-05	23/18866	0.00608142	0.0207797	0.00453517	TP53	1
BP	GO:0002052	positive regulation of neuroblast proliferation	2021-01-05	23/18866	0.00608142	0.0207797	0.00453517	VEGFA	1
BP	GO:0007413	axonal fasciculation	2021-01-05	23/18866	0.00608142	0.0207797	0.00453517	CASP3	1
BP	GO:0035162	embryonic hemopoiesis	2021-01-05	23/18866	0.00608142	0.0207797	0.00453517	VEGFA	1
BP	GO:0035743	CD4-positive, alpha-beta T cell cytokine production	2021-01-05	23/18866	0.00608142	0.0207797	0.00453517	IL6	1
BP	GO:0090343	positive regulation of cell aging	2021-01-05	23/18866	0.00608142	0.0207797	0.00453517	TP53	1
BP	GO:0106030	neuron projection fasciculation	2021-01-05	23/18866	0.00608142	0.0207797	0.00453517	CASP3	1
BP	GO:1900017	positive regulation of cytokine production involved in inflammatory response	2021-01-05	23/18866	0.00608142	0.0207797	0.00453517	IL6	1
BP	GO:1903589	positive regulation of blood vessel endothelial cell proliferation involved in sprouting angiogenesis	2021-01-05	23/18866	0.00608142	0.0207797	0.00453517	VEGFA	1
BP	GO:1904996	positive regulation of leukocyte adhesion to vascular endothelial cell	2021-01-05	23/18866	0.00608142	0.0207797	0.00453517	IL6	1
BP	GO:2000178	negative regulation of neural precursor cell proliferation	2021-01-05	23/18866	0.00608142	0.0207797	0.00453517	TP53	1
BP	GO:0016569	covalent chromatin modification	2021-02-05	481/18866	0.00616386	0.0210001	0.00458329	TP53/VEGFA	2
BP	GO:0050769	positive regulation of neurogenesis	2021-02-05	485/18866	0.00626422	0.0212802	0.00464441	IL6/VEGFA	2
BP	GO:0044346	fibroblast apoptotic process	2021-01-05	24/18866	0.00634516	0.0213693	0.00466386	TP53	1
BP	GO:0060444	branching involved in mammary gland duct morphogenesis	2021-01-05	24/18866	0.00634516	0.0213693	0.00466386	ESR1	1
BP	GO:1902993	positive regulation of amyloid precursor protein catabolic process	2021-01-05	24/18866	0.00634516	0.0213693	0.00466386	CASP3	1
BP	GO:0016049	cell growth	2021-02-05	490/18866	0.00639075	0.0214612	0.00468392	TP53/VEGFA	2
BP	GO:0000423	mitophagy	2021-01-05	25/18866	0.00660884	0.0217572	0.00474852	TP53	1
BP	GO:0002053	positive regulation of mesenchymal cell proliferation	2021-01-05	25/18866	0.00660884	0.0217572	0.00474852	VEGFA	1
BP	GO:0002092	positive regulation of receptor internalization	2021-01-05	25/18866	0.00660884	0.0217572	0.00474852	VEGFA	1
BP	GO:0050927	positive regulation of positive chemotaxis	2021-01-05	25/18866	0.00660884	0.0217572	0.00474852	VEGFA	1
BP	GO:0051894	positive regulation of focal adhesion assembly	2021-01-05	25/18866	0.00660884	0.0217572	0.00474852	VEGFA	1
BP	GO:0061217	regulation of mesonephros development	2021-01-05	25/18866	0.00660884	0.0217572	0.00474852	VEGFA	1
BP	GO:2001026	regulation of endothelial cell chemotaxis	2021-01-05	25/18866	0.00660884	0.0217572	0.00474852	VEGFA	1
BP	GO:0001945	lymph vessel development	2021-01-05	26/18866	0.00687246	0.0222501	0.00485609	VEGFA	1
BP	GO:0050926	regulation of positive chemotaxis	2021-01-05	26/18866	0.00687246	0.0222501	0.00485609	VEGFA	1
BP	GO:0051156	glucose 6-phosphate metabolic process	2021-01-05	26/18866	0.00687246	0.0222501	0.00485609	TP53	1
BP	GO:0060740	prostate gland epithelium morphogenesis	2021-01-05	26/18866	0.00687246	0.0222501	0.00485609	ESR1	1
BP	GO:1900739	regulation of protein insertion into mitochondrial membrane involved in apoptotic signaling pathway	2021-01-05	26/18866	0.00687246	0.0222501	0.00485609	TP53	1
BP	GO:1900740	positive regulation of protein insertion into mitochondrial membrane involved in apoptotic signaling pathway	2021-01-05	26/18866	0.00687246	0.0222501	0.00485609	TP53	1
BP	GO:0009651	response to salt stress	2021-01-05	27/18866	0.00713603	0.0228509	0.00498722	TP53	1
BP	GO:0031954	positive regulation of protein autophosphorylation	2021-01-05	27/18866	0.00713603	0.0228509	0.00498722	VEGFA	1
BP	GO:0048143	astrocyte activation	2021-01-05	27/18866	0.00713603	0.0228509	0.00498722	IL6	1
BP	GO:0072539	T-helper 17 cell differentiation	2021-01-05	27/18866	0.00713603	0.0228509	0.00498722	IL6	1
BP	GO:0002335	mature B cell differentiation	2021-01-05	28/18866	0.00739955	0.0231879	0.00506076	IL6	1
BP	GO:0010575	positive regulation of vascular endothelial growth factor production	2021-01-05	28/18866	0.00739955	0.0231879	0.00506076	IL6	1
BP	GO:0033598	mammary gland epithelial cell proliferation	2021-01-05	28/18866	0.00739955	0.0231879	0.00506076	ESR1	1
BP	GO:0044331	cell-cell adhesion mediated by cadherin	2021-01-05	28/18866	0.00739955	0.0231879	0.00506076	VEGFA	1
BP	GO:0060512	prostate gland morphogenesis	2021-01-05	28/18866	0.00739955	0.0231879	0.00506076	ESR1	1
BP	GO:0071168	protein localization to chromatin	2021-01-05	28/18866	0.00739955	0.0231879	0.00506076	ESR1	1
BP	GO:0090200	positive regulation of release of cytochrome c from mitochondria	2021-01-05	28/18866	0.00739955	0.0231879	0.00506076	TP53	1
BP	GO:1903579	negative regulation of ATP metabolic process	2021-01-05	28/18866	0.00739955	0.0231879	0.00506076	TP53	1
BP	GO:0001782	B cell homeostasis	2021-01-05	29/18866	0.007663	0.0236343	0.0051582	CASP3	1
BP	GO:0007263	nitric oxide mediated signal transduction	2021-01-05	29/18866	0.007663	0.0236343	0.0051582	VEGFA	1
BP	GO:0008209	androgen metabolic process	2021-01-05	29/18866	0.007663	0.0236343	0.0051582	ESR1	1
BP	GO:0043153	entrainment of circadian clock by photoperiod	2021-01-05	29/18866	0.007663	0.0236343	0.0051582	TP53	1
BP	GO:0150117	positive regulation of cell-substrate junction organization	2021-01-05	29/18866	0.007663	0.0236343	0.0051582	VEGFA	1
BP	GO:2000108	positive regulation of leukocyte apoptotic process	2021-01-05	29/18866	0.007663	0.0236343	0.0051582	TP53	1
BP	GO:0001844	protein insertion into mitochondrial membrane involved in apoptotic signaling pathway	2021-01-05	30/18866	0.0079264	0.0241292	0.00526621	TP53	1
BP	GO:0003401	axis elongation	2021-01-05	30/18866	0.0079264	0.0241292	0.00526621	ESR1	1
BP	GO:0048147	negative regulation of fibroblast proliferation	2021-01-05	30/18866	0.0079264	0.0241292	0.00526621	TP53	1
BP	GO:0060055	angiogenesis involved in wound healing	2021-01-05	30/18866	0.0079264	0.0241292	0.00526621	VEGFA	1
BP	GO:0071480	cellular response to gamma radiation	2021-01-05	30/18866	0.0079264	0.0241292	0.00526621	TP53	1
BP	GO:0002675	positive regulation of acute inflammatory response	2021-01-05	31/18866	0.00818975	0.0245483	0.00535768	IL6	1
BP	GO:0002828	regulation of type 2 immune response	2021-01-05	31/18866	0.00818975	0.0245483	0.00535768	IL6	1
BP	GO:0048710	regulation of astrocyte differentiation	2021-01-05	31/18866	0.00818975	0.0245483	0.00535768	IL6	1
BP	GO:0072538	T-helper 17 type immune response	2021-01-05	31/18866	0.00818975	0.0245483	0.00535768	IL6	1
BP	GO:1900745	positive regulation of p38MAPK cascade	2021-01-05	31/18866	0.00818975	0.0245483	0.00535768	VEGFA	1
BP	GO:1902253	regulation of intrinsic apoptotic signaling pathway by p53 class mediator	2021-01-05	31/18866	0.00818975	0.0245483	0.00535768	TP53	1
BP	GO:0002724	regulation of T cell cytokine production	2021-01-05	32/18866	0.00845304	0.0248919	0.00543266	IL6	1
BP	GO:0035767	endothelial cell chemotaxis	2021-01-05	32/18866	0.00845304	0.0248919	0.00543266	VEGFA	1
BP	GO:0048841	regulation of axon extension involved in axon guidance	2021-01-05	32/18866	0.00845304	0.0248919	0.00543266	VEGFA	1
BP	GO:0050869	negative regulation of B cell activation	2021-01-05	32/18866	0.00845304	0.0248919	0.00543266	CASP3	1
BP	GO:0060603	mammary gland duct morphogenesis	2021-01-05	32/18866	0.00845304	0.0248919	0.00543266	ESR1	1
BP	GO:0070528	protein kinase C signaling	2021-01-05	32/18866	0.00845304	0.0248919	0.00543266	VEGFA	1
BP	GO:0097421	liver regeneration	2021-01-05	32/18866	0.00845304	0.0248919	0.00543266	IL6	1
BP	GO:0009303	rRNA transcription	2021-01-05	33/18866	0.00871627	0.0252234	0.00550501	TP53	1
BP	GO:0009648	photoperiodism	2021-01-05	33/18866	0.00871627	0.0252234	0.00550501	TP53	1
BP	GO:0010464	regulation of mesenchymal cell proliferation	2021-01-05	33/18866	0.00871627	0.0252234	0.00550501	VEGFA	1
BP	GO:0033028	myeloid cell apoptotic process	2021-01-05	33/18866	0.00871627	0.0252234	0.00550501	IL6	1
BP	GO:0045736	negative regulation of cyclin-dependent protein serine/threonine kinase activity	2021-01-05	33/18866	0.00871627	0.0252234	0.00550501	CASP3	1
BP	GO:0048011	neurotrophin TRK receptor signaling pathway	2021-01-05	33/18866	0.00871627	0.0252234	0.00550501	CASP3	1
BP	GO:1902003	regulation of amyloid-beta formation	2021-01-05	33/18866	0.00871627	0.0252234	0.00550501	CASP3	1
BP	GO:0008156	negative regulation of DNA replication	2021-01-05	34/18866	0.00897945	0.0254816	0.00556138	TP53	1
BP	GO:0009649	entrainment of circadian clock	2021-01-05	34/18866	0.00897945	0.0254816	0.00556138	TP53	1
BP	GO:0016242	negative regulation of macroautophagy	2021-01-05	34/18866	0.00897945	0.0254816	0.00556138	TP53	1
BP	GO:0043516	regulation of DNA damage response, signal transduction by p53 class mediator	2021-01-05	34/18866	0.00897945	0.0254816	0.00556138	TP53	1
BP	GO:0070050	neuron cellular homeostasis	2021-01-05	34/18866	0.00897945	0.0254816	0.00556138	IL6	1
BP	GO:0070102	interleukin-6-mediated signaling pathway	2021-01-05	34/18866	0.00897945	0.0254816	0.00556138	IL6	1
BP	GO:0070232	regulation of T cell apoptotic process	2021-01-05	34/18866	0.00897945	0.0254816	0.00556138	TP53	1
BP	GO:1904030	negative regulation of cyclin-dependent protein kinase activity	2021-01-05	34/18866	0.00897945	0.0254816	0.00556138	CASP3	1
BP	GO:0006739	NADP metabolic process	2021-01-05	35/18866	0.00924257	0.0258527	0.00564237	TP53	1
BP	GO:0010259	multicellular organism aging	2021-01-05	35/18866	0.00924257	0.0258527	0.00564237	TP53	1
BP	GO:0042462	eye photoreceptor cell development	2021-01-05	35/18866	0.00924257	0.0258527	0.00564237	VEGFA	1
BP	GO:0060251	regulation of glial cell proliferation	2021-01-05	35/18866	0.00924257	0.0258527	0.00564237	IL6	1
BP	GO:0071312	cellular response to alkaloid	2021-01-05	35/18866	0.00924257	0.0258527	0.00564237	CASP3	1
BP	GO:1901030	positive regulation of mitochondrial outer membrane permeabilization involved in apoptotic signaling pathway	2021-01-05	35/18866	0.00924257	0.0258527	0.00564237	TP53	1
BP	GO:0001569	branching involved in blood vessel morphogenesis	2021-01-05	36/18866	0.00950563	0.0263371	0.00574809	VEGFA	1
BP	GO:0006007	glucose catabolic process	2021-01-05	36/18866	0.00950563	0.0263371	0.00574809	TP53	1
BP	GO:0043368	positive T cell selection	2021-01-05	36/18866	0.00950563	0.0263371	0.00574809	IL6	1
BP	GO:1905332	positive regulation of morphogenesis of an epithelium	2021-01-05	36/18866	0.00950563	0.0263371	0.00574809	VEGFA	1
BP	GO:0048846	axon extension involved in axon guidance	2021-01-05	37/18866	0.00976864	0.0267497	0.00583812	VEGFA	1
BP	GO:0071542	dopaminergic neuron differentiation	2021-01-05	37/18866	0.00976864	0.0267497	0.00583812	VEGFA	1
BP	GO:0090050	positive regulation of cell migration involved in sprouting angiogenesis	2021-01-05	37/18866	0.00976864	0.0267497	0.00583812	VEGFA	1
BP	GO:1902284	neuron projection extension involved in neuron projection guidance	2021-01-05	37/18866	0.00976864	0.0267497	0.00583812	VEGFA	1
BP	GO:1904994	regulation of leukocyte adhesion to vascular endothelial cell	2021-01-05	37/18866	0.00976864	0.0267497	0.00583812	IL6	1
BP	GO:0010661	positive regulation of muscle cell apoptotic process	2021-01-05	38/18866	0.0100316	0.0270899	0.00591239	TP53	1
BP	GO:0030224	monocyte differentiation	2021-01-05	38/18866	0.0100316	0.0270899	0.00591239	VEGFA	1
BP	GO:0032733	positive regulation of interleukin-10 production	2021-01-05	38/18866	0.0100316	0.0270899	0.00591239	IL6	1
BP	GO:0043029	T cell homeostasis	2021-01-05	38/18866	0.0100316	0.0270899	0.00591239	CASP3	1
BP	GO:0071392	cellular response to estradiol stimulus	2021-01-05	38/18866	0.0100316	0.0270899	0.00591239	ESR1	1
BP	GO:1903131	mononuclear cell differentiation	2021-01-05	38/18866	0.0100316	0.0270899	0.00591239	VEGFA	1
BP	GO:0032660	regulation of interleukin-17 production	2021-01-05	39/18866	0.0102945	0.0273586	0.00597103	IL6	1
BP	GO:0033146	regulation of intracellular estrogen receptor signaling pathway	2021-01-05	39/18866	0.0102945	0.0273586	0.00597103	ESR1	1
BP	GO:0034205	amyloid-beta formation	2021-01-05	39/18866	0.0102945	0.0273586	0.00597103	CASP3	1
BP	GO:0035886	vascular associated smooth muscle cell differentiation	2021-01-05	39/18866	0.0102945	0.0273586	0.00597103	VEGFA	1
BP	GO:0038179	neurotrophin signaling pathway	2021-01-05	39/18866	0.0102945	0.0273586	0.00597103	CASP3	1
BP	GO:0042092	type 2 immune response	2021-01-05	39/18866	0.0102945	0.0273586	0.00597103	IL6	1
BP	GO:2000279	negative regulation of DNA biosynthetic process	2021-01-05	39/18866	0.0102945	0.0273586	0.00597103	TP53	1
BP	GO:0043902	positive regulation of multi-organism process	2021-01-05	40/18866	0.0105573	0.0278049	0.00606844	VEGFA	1
BP	GO:0090184	positive regulation of kidney development	2021-01-05	40/18866	0.0105573	0.0278049	0.00606844	VEGFA	1
BP	GO:1902895	positive regulation of pri-miRNA transcription by RNA polymerase II	2021-01-05	40/18866	0.0105573	0.0278049	0.00606844	TP53	1
BP	GO:1902991	regulation of amyloid precursor protein catabolic process	2021-01-05	40/18866	0.0105573	0.0278049	0.00606844	CASP3	1
BP	GO:0002251	organ or tissue specific immune response	2021-01-05	41/18866	0.0108201	0.0282432	0.00616408	IL6	1
BP	GO:0006734	NADH metabolic process	2021-01-05	41/18866	0.0108201	0.0282432	0.00616408	TP53	1
BP	GO:0038083	peptidyl-tyrosine autophosphorylation	2021-01-05	41/18866	0.0108201	0.0282432	0.00616408	VEGFA	1
BP	GO:0046825	regulation of protein export from nucleus	2021-01-05	41/18866	0.0108201	0.0282432	0.00616408	TP53	1
BP	GO:0046006	regulation of activated T cell proliferation	2021-01-05	42/18866	0.0110829	0.028737	0.00627185	CASP3	1
BP	GO:0071470	cellular response to osmotic stress	2021-01-05	42/18866	0.0110829	0.028737	0.00627185	CASP3	1
BP	GO:1904037	positive regulation of epithelial cell apoptotic process	2021-01-05	42/18866	0.0110829	0.028737	0.00627185	IL6	1
BP	GO:0002369	T cell cytokine production	2021-01-05	43/18866	0.0113455	0.0290327	0.00633639	IL6	1
BP	GO:0045124	regulation of bone resorption	2021-01-05	43/18866	0.0113455	0.0290327	0.00633639	IL6	1
BP	GO:0045773	positive regulation of axon extension	2021-01-05	43/18866	0.0113455	0.0290327	0.00633639	VEGFA	1
BP	GO:0150077	regulation of neuroinflammatory response	2021-01-05	43/18866	0.0113455	0.0290327	0.00633639	IL6	1
BP	GO:1903146	regulation of autophagy of mitochondrion	2021-01-05	43/18866	0.0113455	0.0290327	0.00633639	TP53	1
BP	GO:2000648	positive regulation of stem cell proliferation	2021-01-05	43/18866	0.0113455	0.0290327	0.00633639	VEGFA	1
BP	GO:0010463	mesenchymal cell proliferation	2021-01-05	44/18866	0.0116081	0.0292894	0.00639243	VEGFA	1
BP	GO:0032620	interleukin-17 production	2021-01-05	44/18866	0.0116081	0.0292894	0.00639243	IL6	1
BP	GO:0032965	regulation of collagen biosynthetic process	2021-01-05	44/18866	0.0116081	0.0292894	0.00639243	IL6	1
BP	GO:0035329	hippo signaling	2021-01-05	44/18866	0.0116081	0.0292894	0.00639243	CASP3	1
BP	GO:1902667	regulation of axon guidance	2021-01-05	44/18866	0.0116081	0.0292894	0.00639243	VEGFA	1
BP	GO:1903053	regulation of extracellular matrix organization	2021-01-05	44/18866	0.0116081	0.0292894	0.00639243	IL6	1
BP	GO:0002639	positive regulation of immunoglobulin production	2021-01-05	45/18866	0.0118707	0.0292894	0.00639243	IL6	1
BP	GO:0014002	astrocyte development	2021-01-05	45/18866	0.0118707	0.0292894	0.00639243	IL6	1
BP	GO:0031018	endocrine pancreas development	2021-01-05	45/18866	0.0118707	0.0292894	0.00639243	IL6	1
BP	GO:0032722	positive regulation of chemokine production	2021-01-05	45/18866	0.0118707	0.0292894	0.00639243	IL6	1
BP	GO:0035094	response to nicotine	2021-01-05	45/18866	0.0118707	0.0292894	0.00639243	CASP3	1
BP	GO:0042771	intrinsic apoptotic signaling pathway in response to DNA damage by p53 class mediator	2021-01-05	45/18866	0.0118707	0.0292894	0.00639243	TP53	1
BP	GO:0043114	regulation of vascular permeability	2021-01-05	45/18866	0.0118707	0.0292894	0.00639243	VEGFA	1
BP	GO:0051204	protein insertion into mitochondrial membrane	2021-01-05	45/18866	0.0118707	0.0292894	0.00639243	TP53	1
BP	GO:0060443	mammary gland morphogenesis	2021-01-05	45/18866	0.0118707	0.0292894	0.00639243	ESR1	1
BP	GO:0070266	necroptotic process	2021-01-05	45/18866	0.0118707	0.0292894	0.00639243	TP53	1
BP	GO:1901028	regulation of mitochondrial outer membrane permeabilization involved in apoptotic signaling pathway	2021-01-05	45/18866	0.0118707	0.0292894	0.00639243	TP53	1
BP	GO:0001754	eye photoreceptor cell differentiation	2021-01-05	46/18866	0.0121332	0.0295637	0.00645229	VEGFA	1
BP	GO:0010863	positive regulation of phospholipase C activity	2021-01-05	46/18866	0.0121332	0.0295637	0.00645229	ESR1	1
BP	GO:0044275	cellular carbohydrate catabolic process	2021-01-05	46/18866	0.0121332	0.0295637	0.00645229	TP53	1
BP	GO:0050798	activated T cell proliferation	2021-01-05	46/18866	0.0121332	0.0295637	0.00645229	CASP3	1
BP	GO:0061028	establishment of endothelial barrier	2021-01-05	46/18866	0.0121332	0.0295637	0.00645229	VEGFA	1
BP	GO:1900744	regulation of p38MAPK cascade	2021-01-05	46/18866	0.0121332	0.0295637	0.00645229	VEGFA	1
BP	GO:0006953	acute-phase response	2021-01-05	47/18866	0.0123957	0.030016	0.006551	IL6	1
BP	GO:0030225	macrophage differentiation	2021-01-05	47/18866	0.0123957	0.030016	0.006551	VEGFA	1
BP	GO:0048806	genitalia development	2021-01-05	47/18866	0.0123957	0.030016	0.006551	ESR1	1
BP	GO:0031952	regulation of protein autophosphorylation	2021-01-05	48/18866	0.0126581	0.0302943	0.00661175	VEGFA	1
BP	GO:0042461	photoreceptor cell development	2021-01-05	48/18866	0.0126581	0.0302943	0.00661175	VEGFA	1
BP	GO:0045601	regulation of endothelial cell differentiation	2021-01-05	48/18866	0.0126581	0.0302943	0.00661175	VEGFA	1
BP	GO:0051972	regulation of telomerase activity	2021-01-05	48/18866	0.0126581	0.0302943	0.00661175	TP53	1
BP	GO:1900274	regulation of phospholipase C activity	2021-01-05	48/18866	0.0126581	0.0302943	0.00661175	ESR1	1
BP	GO:0002673	regulation of acute inflammatory response	2021-01-05	49/18866	0.0129204	0.0302943	0.00661175	IL6	1
BP	GO:0007595	lactation	2021-01-05	49/18866	0.0129204	0.0302943	0.00661175	VEGFA	1
BP	GO:0010712	regulation of collagen metabolic process	2021-01-05	49/18866	0.0129204	0.0302943	0.00661175	IL6	1
BP	GO:0030850	prostate gland development	2021-01-05	49/18866	0.0129204	0.0302943	0.00661175	ESR1	1
BP	GO:0042149	cellular response to glucose starvation	2021-01-05	49/18866	0.0129204	0.0302943	0.00661175	TP53	1
BP	GO:0045058	T cell selection	2021-01-05	49/18866	0.0129204	0.0302943	0.00661175	IL6	1
BP	GO:0048512	circadian behavior	2021-01-05	49/18866	0.0129204	0.0302943	0.00661175	TP53	1
BP	GO:0070231	T cell apoptotic process	2021-01-05	49/18866	0.0129204	0.0302943	0.00661175	TP53	1
BP	GO:0090151	establishment of protein localization to mitochondrial membrane	2021-01-05	49/18866	0.0129204	0.0302943	0.00661175	TP53	1
BP	GO:0090199	regulation of release of cytochrome c from mitochondria	2021-01-05	49/18866	0.0129204	0.0302943	0.00661175	TP53	1
BP	GO:0001774	microglial cell activation	2021-01-05	50/18866	0.0131827	0.0302943	0.00661175	IL6	1
BP	GO:0002269	leukocyte activation involved in inflammatory response	2021-01-05	50/18866	0.0131827	0.0302943	0.00661175	IL6	1
BP	GO:0002711	positive regulation of T cell mediated immunity	2021-01-05	50/18866	0.0131827	0.0302943	0.00661175	IL6	1
BP	GO:0007622	rhythmic behavior	2021-01-05	50/18866	0.0131827	0.0302943	0.00661175	TP53	1
BP	GO:0008038	neuron recognition	2021-01-05	50/18866	0.0131827	0.0302943	0.00661175	CASP3	1
BP	GO:0010718	positive regulation of epithelial to mesenchymal transition	2021-01-05	50/18866	0.0131827	0.0302943	0.00661175	IL6	1
BP	GO:0014009	glial cell proliferation	2021-01-05	50/18866	0.0131827	0.0302943	0.00661175	IL6	1
BP	GO:0019674	NAD metabolic process	2021-01-05	50/18866	0.0131827	0.0302943	0.00661175	TP53	1
BP	GO:0042987	amyloid precursor protein catabolic process	2021-01-05	50/18866	0.0131827	0.0302943	0.00661175	CASP3	1
BP	GO:0046850	regulation of bone remodeling	2021-01-05	50/18866	0.0131827	0.0302943	0.00661175	IL6	1
BP	GO:0097300	programmed necrotic cell death	2021-01-05	50/18866	0.0131827	0.0302943	0.00661175	TP53	1
BP	GO:0006984	ER-nucleus signaling pathway	2021-01-05	51/18866	0.0134449	0.0303612	0.00662634	TP53	1
BP	GO:0038084	vascular endothelial growth factor signaling pathway	2021-01-05	51/18866	0.0134449	0.0303612	0.00662634	VEGFA	1
BP	GO:0045912	negative regulation of carbohydrate metabolic process	2021-01-05	51/18866	0.0134449	0.0303612	0.00662634	TP53	1
BP	GO:0048146	positive regulation of fibroblast proliferation	2021-01-05	51/18866	0.0134449	0.0303612	0.00662634	ESR1	1
BP	GO:0050435	amyloid-beta metabolic process	2021-01-05	51/18866	0.0134449	0.0303612	0.00662634	CASP3	1
BP	GO:0060976	coronary vasculature development	2021-01-05	51/18866	0.0134449	0.0303612	0.00662634	VEGFA	1
BP	GO:0071354	cellular response to interleukin-6	2021-01-05	51/18866	0.0134449	0.0303612	0.00662634	IL6	1
BP	GO:1902893	regulation of pri-miRNA transcription by RNA polymerase II	2021-01-05	51/18866	0.0134449	0.0303612	0.00662634	TP53	1
BP	GO:1903587	regulation of blood vessel endothelial cell proliferation involved in sprouting angiogenesis	2021-01-05	51/18866	0.0134449	0.0303612	0.00662634	VEGFA	1
BP	GO:0010883	regulation of lipid storage	2021-01-05	52/18866	0.0137071	0.0307753	0.00671672	IL6	1
BP	GO:0038066	p38MAPK cascade	2021-01-05	52/18866	0.0137071	0.0307753	0.00671672	VEGFA	1
BP	GO:0048260	positive regulation of receptor-mediated endocytosis	2021-01-05	52/18866	0.0137071	0.0307753	0.00671672	VEGFA	1
BP	GO:0032731	positive regulation of interleukin-1 beta production	2021-01-05	53/18866	0.0139692	0.0309488	0.00675459	IL6	1
BP	GO:0032964	collagen biosynthetic process	2021-01-05	53/18866	0.0139692	0.0309488	0.00675459	IL6	1
BP	GO:0043124	negative regulation of I-kappaB kinase/NF-kappaB signaling	2021-01-05	53/18866	0.0139692	0.0309488	0.00675459	ESR1	1
BP	GO:0045599	negative regulation of fat cell differentiation	2021-01-05	53/18866	0.0139692	0.0309488	0.00675459	IL6	1
BP	GO:0061614	pri-miRNA transcription by RNA polymerase II	2021-01-05	53/18866	0.0139692	0.0309488	0.00675459	TP53	1
BP	GO:0061756	leukocyte adhesion to vascular endothelial cell	2021-01-05	53/18866	0.0139692	0.0309488	0.00675459	IL6	1
BP	GO:2000772	regulation of cellular senescence	2021-01-05	53/18866	0.0139692	0.0309488	0.00675459	TP53	1
BP	GO:0030857	negative regulation of epithelial cell differentiation	2021-01-05	54/18866	0.0142313	0.0313516	0.0068425	VEGFA	1
BP	GO:0032757	positive regulation of interleukin-8 production	2021-01-05	54/18866	0.0142313	0.0313516	0.0068425	IL6	1
BP	GO:2000179	positive regulation of neural precursor cell proliferation	2021-01-05	54/18866	0.0142313	0.0313516	0.0068425	VEGFA	1
BP	GO:0001954	positive regulation of cell-matrix adhesion	2021-01-05	55/18866	0.0144933	0.0316315	0.00690359	VEGFA	1
BP	GO:0002720	positive regulation of cytokine production involved in immune response	2021-01-05	55/18866	0.0144933	0.0316315	0.00690359	IL6	1
BP	GO:0002931	response to ischemia	2021-01-05	55/18866	0.0144933	0.0316315	0.00690359	TP53	1
BP	GO:0070741	response to interleukin-6	2021-01-05	55/18866	0.0144933	0.0316315	0.00690359	IL6	1
BP	GO:0097345	mitochondrial outer membrane permeabilization	2021-01-05	55/18866	0.0144933	0.0316315	0.00690359	TP53	1
BP	GO:0006977	DNA damage response, signal transduction by p53 class mediator resulting in cell cycle arrest	2021-01-05	56/18866	0.0147552	0.0318474	0.0069507	TP53	1
BP	GO:0010332	response to gamma radiation	2021-01-05	56/18866	0.0147552	0.0318474	0.0069507	TP53	1
BP	GO:0010665	regulation of cardiac muscle cell apoptotic process	2021-01-05	56/18866	0.0147552	0.0318474	0.0069507	TP53	1
BP	GO:0019320	hexose catabolic process	2021-01-05	56/18866	0.0147552	0.0318474	0.0069507	TP53	1
BP	GO:0070228	regulation of lymphocyte apoptotic process	2021-01-05	56/18866	0.0147552	0.0318474	0.0069507	TP53	1
BP	GO:0090183	regulation of kidney development	2021-01-05	56/18866	0.0147552	0.0318474	0.0069507	VEGFA	1
BP	GO:0002090	regulation of receptor internalization	2021-01-05	57/18866	0.0150171	0.0321756	0.00702234	VEGFA	1
BP	GO:0030520	intracellular estrogen receptor signaling pathway	2021-01-05	57/18866	0.0150171	0.0321756	0.00702234	ESR1	1
BP	GO:0072431	signal transduction involved in mitotic G1 DNA damage checkpoint	2021-01-05	57/18866	0.0150171	0.0321756	0.00702234	TP53	1
BP	GO:1902400	intracellular signal transduction involved in G1 DNA damage checkpoint	2021-01-05	57/18866	0.0150171	0.0321756	0.00702234	TP53	1
BP	GO:0002043	blood vessel endothelial cell proliferation involved in sprouting angiogenesis	2021-01-05	58/18866	0.015279	0.032499	0.00709291	VEGFA	1
BP	GO:0007566	embryo implantation	2021-01-05	58/18866	0.015279	0.032499	0.00709291	VEGFA	1
BP	GO:0010662	regulation of striated muscle cell apoptotic process	2021-01-05	58/18866	0.015279	0.032499	0.00709291	TP53	1
BP	GO:1903749	positive regulation of establishment of protein localization to mitochondrion	2021-01-05	58/18866	0.015279	0.032499	0.00709291	TP53	1
BP	GO:0001658	branching involved in ureteric bud morphogenesis	2021-01-05	59/18866	0.0155407	0.0326411	0.00712394	VEGFA	1
BP	GO:0010659	cardiac muscle cell apoptotic process	2021-01-05	59/18866	0.0155407	0.0326411	0.00712394	TP53	1
BP	GO:0043030	regulation of macrophage activation	2021-01-05	59/18866	0.0155407	0.0326411	0.00712394	IL6	1
BP	GO:0048008	platelet-derived growth factor receptor signaling pathway	2021-01-05	59/18866	0.0155407	0.0326411	0.00712394	VEGFA	1
BP	GO:0072413	signal transduction involved in mitotic cell cycle checkpoint	2021-01-05	59/18866	0.0155407	0.0326411	0.00712394	TP53	1
BP	GO:1902402	signal transduction involved in mitotic DNA damage checkpoint	2021-01-05	59/18866	0.0155407	0.0326411	0.00712394	TP53	1
BP	GO:1902403	signal transduction involved in mitotic DNA integrity checkpoint	2021-01-05	59/18866	0.0155407	0.0326411	0.00712394	TP53	1
BP	GO:0001836	release of cytochrome c from mitochondria	2021-01-05	60/18866	0.0158025	0.0327796	0.00715417	TP53	1
BP	GO:0010823	negative regulation of mitochondrion organization	2021-01-05	60/18866	0.0158025	0.0327796	0.00715417	TP53	1
BP	GO:0032653	regulation of interleukin-10 production	2021-01-05	60/18866	0.0158025	0.0327796	0.00715417	IL6	1
BP	GO:0032732	positive regulation of interleukin-1 production	2021-01-05	60/18866	0.0158025	0.0327796	0.00715417	IL6	1
BP	GO:0042093	T-helper cell differentiation	2021-01-05	60/18866	0.0158025	0.0327796	0.00715417	IL6	1
BP	GO:0048747	muscle fiber development	2021-01-05	60/18866	0.0158025	0.0327796	0.00715417	VEGFA	1
BP	GO:0061900	glial cell activation	2021-01-05	60/18866	0.0158025	0.0327796	0.00715417	IL6	1
BP	GO:0010574	regulation of vascular endothelial growth factor production	2021-01-05	61/18866	0.0160641	0.0330301	0.00720884	IL6	1
BP	GO:0010658	striated muscle cell apoptotic process	2021-01-05	61/18866	0.0160641	0.0330301	0.00720884	TP53	1
BP	GO:0061912	selective autophagy	2021-01-05	61/18866	0.0160641	0.0330301	0.00720884	TP53	1
BP	GO:0090342	regulation of cell aging	2021-01-05	61/18866	0.0160641	0.0330301	0.00720884	TP53	1
BP	GO:1902110	positive regulation of mitochondrial membrane permeability involved in apoptotic process	2021-01-05	61/18866	0.0160641	0.0330301	0.00720884	TP53	1
BP	GO:0002260	lymphocyte homeostasis	2021-01-05	62/18866	0.0163257	0.0332761	0.00726253	CASP3	1
BP	GO:0002294	CD4-positive, alpha-beta T cell differentiation involved in immune response	2021-01-05	62/18866	0.0163257	0.0332761	0.00726253	IL6	1
BP	GO:0010518	positive regulation of phospholipase activity	2021-01-05	62/18866	0.0163257	0.0332761	0.00726253	ESR1	1
BP	GO:0030888	regulation of B cell proliferation	2021-01-05	62/18866	0.0163257	0.0332761	0.00726253	CASP3	1
BP	GO:2001244	positive regulation of intrinsic apoptotic signaling pathway	2021-01-05	62/18866	0.0163257	0.0332761	0.00726253	TP53	1
BP	GO:0002287	alpha-beta T cell activation involved in immune response	2021-01-05	63/18866	0.0165873	0.0332882	0.00726517	IL6	1
BP	GO:0002293	alpha-beta T cell differentiation involved in immune response	2021-01-05	63/18866	0.0165873	0.0332882	0.00726517	IL6	1
BP	GO:0031571	mitotic G1 DNA damage checkpoint	2021-01-05	63/18866	0.0165873	0.0332882	0.00726517	TP53	1
BP	GO:0032613	interleukin-10 production	2021-01-05	63/18866	0.0165873	0.0332882	0.00726517	IL6	1
BP	GO:0046530	photoreceptor cell differentiation	2021-01-05	63/18866	0.0165873	0.0332882	0.00726517	VEGFA	1
BP	GO:0051893	regulation of focal adhesion assembly	2021-01-05	63/18866	0.0165873	0.0332882	0.00726517	VEGFA	1
BP	GO:0070059	intrinsic apoptotic signaling pathway in response to endoplasmic reticulum stress	2021-01-05	63/18866	0.0165873	0.0332882	0.00726517	TP53	1
BP	GO:0090109	regulation of cell-substrate junction assembly	2021-01-05	63/18866	0.0165873	0.0332882	0.00726517	VEGFA	1
BP	GO:1902686	mitochondrial outer membrane permeabilization involved in programmed cell death	2021-01-05	63/18866	0.0165873	0.0332882	0.00726517	TP53	1
BP	GO:0001885	endothelial cell development	2021-01-05	64/18866	0.0168488	0.0334125	0.0072923	VEGFA	1
BP	GO:0042130	negative regulation of T cell proliferation	2021-01-05	64/18866	0.0168488	0.0334125	0.0072923	CASP3	1
BP	GO:0044783	G1 DNA damage checkpoint	2021-01-05	64/18866	0.0168488	0.0334125	0.0072923	TP53	1
BP	GO:0044819	mitotic G1/S transition checkpoint	2021-01-05	64/18866	0.0168488	0.0334125	0.0072923	TP53	1
BP	GO:0045453	bone resorption	2021-01-05	64/18866	0.0168488	0.0334125	0.0072923	IL6	1
BP	GO:0060135	maternal process involved in female pregnancy	2021-01-05	64/18866	0.0168488	0.0334125	0.0072923	ESR1	1
BP	GO:0070265	necrotic cell death	2021-01-05	64/18866	0.0168488	0.0334125	0.0072923	TP53	1
BP	GO:0010573	vascular endothelial growth factor production	2021-01-05	65/18866	0.0171103	0.03359	0.00733103	IL6	1
BP	GO:0035794	positive regulation of mitochondrial membrane permeability	2021-01-05	65/18866	0.0171103	0.03359	0.00733103	TP53	1
BP	GO:0051205	protein insertion into membrane	2021-01-05	65/18866	0.0171103	0.03359	0.00733103	TP53	1
BP	GO:0060675	ureteric bud morphogenesis	2021-01-05	65/18866	0.0171103	0.03359	0.00733103	VEGFA	1
BP	GO:0098586	cellular response to virus	2021-01-05	65/18866	0.0171103	0.03359	0.00733103	IL6	1
BP	GO:1905953	negative regulation of lipid localization	2021-01-05	65/18866	0.0171103	0.03359	0.00733103	IL6	1
BP	GO:0045669	positive regulation of osteoblast differentiation	2021-01-05	66/18866	0.0173717	0.0337079	0.00735677	IL6	1
BP	GO:0046365	monosaccharide catabolic process	2021-01-05	66/18866	0.0173717	0.0337079	0.00735677	TP53	1
BP	GO:0046824	positive regulation of nucleocytoplasmic transport	2021-01-05	66/18866	0.0173717	0.0337079	0.00735677	TP53	1
BP	GO:0072171	mesonephric tubule morphogenesis	2021-01-05	66/18866	0.0173717	0.0337079	0.00735677	VEGFA	1
BP	GO:0150116	regulation of cell-substrate junction organization	2021-01-05	66/18866	0.0173717	0.0337079	0.00735677	VEGFA	1
BP	GO:1902108	regulation of mitochondrial membrane permeability involved in apoptotic process	2021-01-05	66/18866	0.0173717	0.0337079	0.00735677	TP53	1
BP	GO:2000378	negative regulation of reactive oxygen species metabolic process	2021-01-05	66/18866	0.0173717	0.0337079	0.00735677	TP53	1
BP	GO:0002548	monocyte chemotaxis	2021-01-05	67/18866	0.017633	0.0338785	0.00739399	IL6	1
BP	GO:0034332	adherens junction organization	2021-01-05	67/18866	0.017633	0.0338785	0.00739399	VEGFA	1
BP	GO:0050918	positive chemotaxis	2021-01-05	67/18866	0.017633	0.0338785	0.00739399	VEGFA	1
BP	GO:1900015	regulation of cytokine production involved in inflammatory response	2021-01-05	67/18866	0.017633	0.0338785	0.00739399	IL6	1
BP	GO:1903672	positive regulation of sprouting angiogenesis	2021-01-05	67/18866	0.017633	0.0338785	0.00739399	VEGFA	1
BP	GO:1905710	positive regulation of membrane permeability	2021-01-05	67/18866	0.017633	0.0338785	0.00739399	TP53	1
BP	GO:0002637	regulation of immunoglobulin production	2021-01-05	68/18866	0.0178943	0.0342122	0.00746683	IL6	1
BP	GO:0032642	regulation of chemokine production	2021-01-05	68/18866	0.0178943	0.0342122	0.00746683	IL6	1
BP	GO:0071479	cellular response to ionizing radiation	2021-01-05	68/18866	0.0178943	0.0342122	0.00746683	TP53	1
BP	GO:0001756	somitogenesis	2021-01-05	70/18866	0.0184167	0.0350965	0.00765982	TP53	1
BP	GO:0002534	cytokine production involved in inflammatory response	2021-01-05	70/18866	0.0184167	0.0350965	0.00765982	IL6	1
BP	GO:0002292	T cell differentiation involved in immune response	2021-01-05	71/18866	0.0186778	0.0352502	0.00769337	IL6	1
BP	GO:0014823	response to activity	2021-01-05	71/18866	0.0186778	0.0352502	0.00769337	IL6	1
BP	GO:0035690	cellular response to drug	2021-01-05	71/18866	0.0186778	0.0352502	0.00769337	TP53	1
BP	GO:0042531	positive regulation of tyrosine phosphorylation of STAT protein	2021-01-05	71/18866	0.0186778	0.0352502	0.00769337	IL6	1
BP	GO:0042982	amyloid precursor protein metabolic process	2021-01-05	71/18866	0.0186778	0.0352502	0.00769337	CASP3	1
BP	GO:0061180	mammary gland epithelium development	2021-01-05	71/18866	0.0186778	0.0352502	0.00769337	ESR1	1
BP	GO:0002709	regulation of T cell mediated immunity	2021-01-05	73/18866	0.0191998	0.0357746	0.00780782	IL6	1
BP	GO:0010517	regulation of phospholipase activity	2021-01-05	73/18866	0.0191998	0.0357746	0.00780782	ESR1	1
BP	GO:0051145	smooth muscle cell differentiation	2021-01-05	73/18866	0.0191998	0.0357746	0.00780782	VEGFA	1
BP	GO:0070227	lymphocyte apoptotic process	2021-01-05	73/18866	0.0191998	0.0357746	0.00780782	TP53	1
BP	GO:0072078	nephron tubule morphogenesis	2021-01-05	73/18866	0.0191998	0.0357746	0.00780782	VEGFA	1
BP	GO:0072401	signal transduction involved in DNA integrity checkpoint	2021-01-05	73/18866	0.0191998	0.0357746	0.00780782	TP53	1
BP	GO:0072422	signal transduction involved in DNA damage checkpoint	2021-01-05	73/18866	0.0191998	0.0357746	0.00780782	TP53	1
BP	GO:1903747	regulation of establishment of protein localization to mitochondrion	2021-01-05	73/18866	0.0191998	0.0357746	0.00780782	TP53	1
BP	GO:0034121	regulation of toll-like receptor signaling pathway	2021-01-05	74/18866	0.0194608	0.036059	0.00786989	ESR1	1
BP	GO:0072395	signal transduction involved in cell cycle checkpoint	2021-01-05	74/18866	0.0194608	0.036059	0.00786989	TP53	1
BP	GO:0031100	animal organ regeneration	2021-01-05	75/18866	0.0197217	0.036059	0.00786989	IL6	1
BP	GO:0032602	chemokine production	2021-01-05	75/18866	0.0197217	0.036059	0.00786989	IL6	1
BP	GO:0033143	regulation of intracellular steroid hormone receptor signaling pathway	2021-01-05	75/18866	0.0197217	0.036059	0.00786989	ESR1	1
BP	GO:0035924	cellular response to vascular endothelial growth factor stimulus	2021-01-05	75/18866	0.0197217	0.036059	0.00786989	VEGFA	1
BP	GO:0038034	signal transduction in absence of ligand	2021-01-05	75/18866	0.0197217	0.036059	0.00786989	CASP3	1
BP	GO:0043627	response to estrogen	2021-01-05	75/18866	0.0197217	0.036059	0.00786989	ESR1	1
BP	GO:0045685	regulation of glial cell differentiation	2021-01-05	75/18866	0.0197217	0.036059	0.00786989	IL6	1
BP	GO:0048844	artery morphogenesis	2021-01-05	75/18866	0.0197217	0.036059	0.00786989	VEGFA	1
BP	GO:0072088	nephron epithelium morphogenesis	2021-01-05	75/18866	0.0197217	0.036059	0.00786989	VEGFA	1
BP	GO:0097192	extrinsic apoptotic signaling pathway in absence of ligand	2021-01-05	75/18866	0.0197217	0.036059	0.00786989	CASP3	1
BP	GO:0033077	T cell differentiation in thymus	2021-01-05	76/18866	0.0199825	0.0363657	0.00793683	TP53	1
BP	GO:0060193	positive regulation of lipase activity	2021-01-05	76/18866	0.0199825	0.0363657	0.00793683	ESR1	1
BP	GO:0071229	cellular response to acid chemical	2021-01-05	76/18866	0.0199825	0.0363657	0.00793683	VEGFA	1
BP	GO:0014015	positive regulation of gliogenesis	2021-01-05	77/18866	0.0202433	0.0365002	0.00796619	IL6	1
BP	GO:0046902	regulation of mitochondrial membrane permeability	2021-01-05	77/18866	0.0202433	0.0365002	0.00796619	TP53	1
BP	GO:0060411	cardiac septum morphogenesis	2021-01-05	77/18866	0.0202433	0.0365002	0.00796619	TP53	1
BP	GO:0061333	renal tubule morphogenesis	2021-01-05	77/18866	0.0202433	0.0365002	0.00796619	VEGFA	1
BP	GO:0072028	nephron morphogenesis	2021-01-05	77/18866	0.0202433	0.0365002	0.00796619	VEGFA	1
BP	GO:0150076	neuroinflammatory response	2021-01-05	77/18866	0.0202433	0.0365002	0.00796619	IL6	1
BP	GO:0043367	CD4-positive, alpha-beta T cell differentiation	2021-01-05	78/18866	0.020504	0.0368005	0.00803172	IL6	1
BP	GO:0043900	regulation of multi-organism process	2021-01-05	78/18866	0.020504	0.0368005	0.00803172	VEGFA	1
BP	GO:0072332	intrinsic apoptotic signaling pathway by p53 class mediator	2021-01-05	78/18866	0.020504	0.0368005	0.00803172	TP53	1
BP	GO:0000422	autophagy of mitochondrion	2021-01-05	79/18866	0.0207647	0.0368731	0.00804756	TP53	1
BP	GO:0031016	pancreas development	2021-01-05	79/18866	0.0207647	0.0368731	0.00804756	IL6	1
BP	GO:0043462	regulation of ATPase activity	2021-01-05	79/18866	0.0207647	0.0368731	0.00804756	TP53	1
BP	GO:0043536	positive regulation of blood vessel endothelial cell migration	2021-01-05	79/18866	0.0207647	0.0368731	0.00804756	VEGFA	1
BP	GO:0050672	negative regulation of lymphocyte proliferation	2021-01-05	79/18866	0.0207647	0.0368731	0.00804756	CASP3	1
BP	GO:0061726	mitochondrion disassembly	2021-01-05	79/18866	0.0207647	0.0368731	0.00804756	TP53	1
BP	GO:0090398	cellular senescence	2021-01-05	79/18866	0.0207647	0.0368731	0.00804756	TP53	1
BP	GO:0002312	B cell activation involved in immune response	2021-01-05	80/18866	0.0210253	0.0371669	0.0081117	IL6	1
BP	GO:0003151	outflow tract morphogenesis	2021-01-05	80/18866	0.0210253	0.0371669	0.0081117	VEGFA	1
BP	GO:0032945	negative regulation of mononuclear cell proliferation	2021-01-05	80/18866	0.0210253	0.0371669	0.0081117	CASP3	1
BP	GO:0001960	negative regulation of cytokine-mediated signaling pathway	2021-01-05	81/18866	0.0212859	0.0372901	0.00813857	IL6	1
BP	GO:0019915	lipid storage	2021-01-05	81/18866	0.0212859	0.0372901	0.00813857	IL6	1
BP	GO:0021766	hippocampus development	2021-01-05	81/18866	0.0212859	0.0372901	0.00813857	CASP3	1
BP	GO:0034644	cellular response to UV	2021-01-05	81/18866	0.0212859	0.0372901	0.00813857	TP53	1
BP	GO:0050829	defense response to Gram-negative bacterium	2021-01-05	81/18866	0.0212859	0.0372901	0.00813857	IL6	1
BP	GO:0071158	positive regulation of cell cycle arrest	2021-01-05	81/18866	0.0212859	0.0372901	0.00813857	TP53	1
BP	GO:0022617	extracellular matrix disassembly	2021-01-05	82/18866	0.0215464	0.0376901	0.00822588	IL6	1
BP	GO:0001570	vasculogenesis	2021-01-05	83/18866	0.0218068	0.0378071	0.00825142	VEGFA	1
BP	GO:0002718	regulation of cytokine production involved in immune response	2021-01-05	83/18866	0.0218068	0.0378071	0.00825142	IL6	1
BP	GO:0048041	focal adhesion assembly	2021-01-05	83/18866	0.0218068	0.0378071	0.00825142	VEGFA	1
BP	GO:0048708	astrocyte differentiation	2021-01-05	83/18866	0.0218068	0.0378071	0.00825142	IL6	1
BP	GO:0055013	cardiac muscle cell development	2021-01-05	83/18866	0.0218068	0.0378071	0.00825142	VEGFA	1
BP	GO:2000243	positive regulation of reproductive process	2021-01-05	83/18866	0.0218068	0.0378071	0.00825142	VEGFA	1
BP	GO:0010507	negative regulation of autophagy	2021-01-05	85/18866	0.0223276	0.0384822	0.00839876	TP53	1
BP	GO:0034502	protein localization to chromosome	2021-01-05	85/18866	0.0223276	0.0384822	0.00839876	ESR1	1
BP	GO:0043154	negative regulation of cysteine-type endopeptidase activity involved in apoptotic process	2021-01-05	85/18866	0.0223276	0.0384822	0.00839876	VEGFA	1
BP	GO:0110110	positive regulation of animal organ morphogenesis	2021-01-05	85/18866	0.0223276	0.0384822	0.00839876	VEGFA	1
BP	GO:0009791	post-embryonic development	2021-01-05	86/18866	0.0225878	0.0386467	0.00843465	VEGFA	1
BP	GO:0042509	regulation of tyrosine phosphorylation of STAT protein	2021-01-05	86/18866	0.0225878	0.0386467	0.00843465	IL6	1
BP	GO:0050772	positive regulation of axonogenesis	2021-01-05	86/18866	0.0225878	0.0386467	0.00843465	VEGFA	1
BP	GO:0070664	negative regulation of leukocyte proliferation	2021-01-05	86/18866	0.0225878	0.0386467	0.00843465	CASP3	1
BP	GO:2000106	regulation of leukocyte apoptotic process	2021-01-05	86/18866	0.0225878	0.0386467	0.00843465	TP53	1
BP	GO:0030512	negative regulation of transforming growth factor beta receptor signaling pathway	2021-01-05	87/18866	0.0228481	0.0387524	0.00845774	TP53	1
BP	GO:0051262	protein tetramerization	2021-01-05	87/18866	0.0228481	0.0387524	0.00845774	TP53	1
BP	GO:0051781	positive regulation of cell division	2021-01-05	87/18866	0.0228481	0.0387524	0.00845774	VEGFA	1
BP	GO:0060218	hematopoietic stem cell differentiation	2021-01-05	87/18866	0.0228481	0.0387524	0.00845774	TP53	1
BP	GO:0060761	negative regulation of response to cytokine stimulus	2021-01-05	87/18866	0.0228481	0.0387524	0.00845774	IL6	1
BP	GO:0090049	regulation of cell migration involved in sprouting angiogenesis	2021-01-05	87/18866	0.0228481	0.0387524	0.00845774	VEGFA	1
BP	GO:0032755	positive regulation of interleukin-6 production	2021-01-05	88/18866	0.0231082	0.0390806	0.00852936	IL6	1
BP	GO:0090559	regulation of membrane permeability	2021-01-05	88/18866	0.0231082	0.0390806	0.00852936	TP53	1
BP	GO:0007260	tyrosine phosphorylation of STAT protein	2021-01-05	89/18866	0.0233684	0.0392937	0.00857587	IL6	1
BP	GO:0055006	cardiac cell development	2021-01-05	89/18866	0.0233684	0.0392937	0.00857587	VEGFA	1
BP	GO:0061053	somite development	2021-01-05	89/18866	0.0233684	0.0392937	0.00857587	TP53	1
BP	GO:1903845	negative regulation of cellular response to transforming growth factor beta stimulus	2021-01-05	89/18866	0.0233684	0.0392937	0.00857587	TP53	1
BP	GO:0043470	regulation of carbohydrate catabolic process	2021-01-05	90/18866	0.0236284	0.0396173	0.0086465	TP53	1
BP	GO:0046427	positive regulation of receptor signaling pathway via JAK-STAT	2021-01-05	90/18866	0.0236284	0.0396173	0.0086465	IL6	1
BP	GO:0001843	neural tube closure	2021-01-05	91/18866	0.0238884	0.0398821	0.00870429	CASP3	1
BP	GO:0046849	bone remodeling	2021-01-05	91/18866	0.0238884	0.0398821	0.00870429	IL6	1
BP	GO:0060333	interferon-gamma-mediated signaling pathway	2021-01-05	91/18866	0.0238884	0.0398821	0.00870429	TP53	1
BP	GO:0060606	tube closure	2021-01-05	92/18866	0.0241484	0.0402587	0.00878649	CASP3	1
BP	GO:0002532	production of molecular mediator involved in inflammatory response	2021-01-05	93/18866	0.0244083	0.0404047	0.00881833	IL6	1
BP	GO:0032677	regulation of interleukin-8 production	2021-01-05	93/18866	0.0244083	0.0404047	0.00881833	IL6	1
BP	GO:0072080	nephron tubule development	2021-01-05	93/18866	0.0244083	0.0404047	0.00881833	VEGFA	1
BP	GO:1904894	positive regulation of receptor signaling pathway via STAT	2021-01-05	93/18866	0.0244083	0.0404047	0.00881833	IL6	1
BP	GO:2000117	negative regulation of cysteine-type endopeptidase activity	2021-01-05	93/18866	0.0244083	0.0404047	0.00881833	VEGFA	1
BP	GO:0010660	regulation of muscle cell apoptotic process	2021-01-05	94/18866	0.0246681	0.0406054	0.00886214	TP53	1
BP	GO:0045778	positive regulation of ossification	2021-01-05	94/18866	0.0246681	0.0406054	0.00886214	IL6	1
BP	GO:0060993	kidney morphogenesis	2021-01-05	94/18866	0.0246681	0.0406054	0.00886214	VEGFA	1
BP	GO:1904035	regulation of epithelial cell apoptotic process	2021-01-05	94/18866	0.0246681	0.0406054	0.00886214	IL6	1
BP	GO:0007589	body fluid secretion	2021-01-05	95/18866	0.0249279	0.0409181	0.00893038	VEGFA	1
BP	GO:0061326	renal tubule development	2021-01-05	95/18866	0.0249279	0.0409181	0.00893038	VEGFA	1
BP	GO:0030516	regulation of axon extension	2021-01-05	97/18866	0.0254473	0.0414225	0.00904049	VEGFA	1
BP	GO:0032651	regulation of interleukin-1 beta production	2021-01-05	97/18866	0.0254473	0.0414225	0.00904049	IL6	1
BP	GO:0035710	CD4-positive, alpha-beta T cell activation	2021-01-05	97/18866	0.0254473	0.0414225	0.00904049	IL6	1
BP	GO:0042100	B cell proliferation	2021-01-05	97/18866	0.0254473	0.0414225	0.00904049	CASP3	1
BP	GO:0071674	mononuclear cell migration	2021-01-05	97/18866	0.0254473	0.0414225	0.00904049	IL6	1
BP	GO:0120162	positive regulation of cold-induced thermogenesis	2021-01-05	97/18866	0.0254473	0.0414225	0.00904049	VEGFA	1
BP	GO:0001657	ureteric bud development	2021-01-05	98/18866	0.0257069	0.041614	0.00908226	VEGFA	1
BP	GO:0010657	muscle cell apoptotic process	2021-01-05	98/18866	0.0257069	0.041614	0.00908226	TP53	1
BP	GO:0014020	primary neural tube formation	2021-01-05	98/18866	0.0257069	0.041614	0.00908226	CASP3	1
BP	GO:0048010	vascular endothelial growth factor receptor signaling pathway	2021-01-05	98/18866	0.0257069	0.041614	0.00908226	VEGFA	1
BP	GO:0007044	cell-substrate junction assembly	2021-01-05	99/18866	0.0259665	0.0416886	0.00909856	VEGFA	1
BP	GO:0010717	regulation of epithelial to mesenchymal transition	2021-01-05	99/18866	0.0259665	0.0416886	0.00909856	IL6	1
BP	GO:0050830	defense response to Gram-positive bacterium	2021-01-05	99/18866	0.0259665	0.0416886	0.00909856	IL6	1
BP	GO:0062207	regulation of pattern recognition receptor signaling pathway	2021-01-05	99/18866	0.0259665	0.0416886	0.00909856	ESR1	1
BP	GO:0072163	mesonephric epithelium development	2021-01-05	99/18866	0.0259665	0.0416886	0.00909856	VEGFA	1
BP	GO:0072164	mesonephric tubule development	2021-01-05	99/18866	0.0259665	0.0416886	0.00909856	VEGFA	1
BP	GO:0002702	positive regulation of production of molecular mediator of immune response	2021-01-05	100/18866	0.026226	0.0418758	0.00913941	IL6	1
BP	GO:0035282	segmentation	2021-01-05	100/18866	0.026226	0.0418758	0.00913941	TP53	1
BP	GO:0045807	positive regulation of endocytosis	2021-01-05	100/18866	0.026226	0.0418758	0.00913941	VEGFA	1
BP	GO:0070301	cellular response to hydrogen peroxide	2021-01-05	100/18866	0.026226	0.0418758	0.00913941	IL6	1
BP	GO:0032637	interleukin-8 production	2021-01-05	101/18866	0.0264854	0.042004	0.00916738	IL6	1
BP	GO:0042102	positive regulation of T cell proliferation	2021-01-05	101/18866	0.0264854	0.042004	0.00916738	IL6	1
BP	GO:0042116	macrophage activation	2021-01-05	101/18866	0.0264854	0.042004	0.00916738	IL6	1
BP	GO:0044773	mitotic DNA damage checkpoint	2021-01-05	101/18866	0.0264854	0.042004	0.00916738	TP53	1
BP	GO:0060191	regulation of lipase activity	2021-01-05	101/18866	0.0264854	0.042004	0.00916738	ESR1	1
BP	GO:0000079	regulation of cyclin-dependent protein serine/threonine kinase activity	2021-01-05	102/18866	0.0267448	0.0422439	0.00921974	CASP3	1
BP	GO:0060840	artery development	2021-01-05	102/18866	0.0267448	0.0422439	0.00921974	VEGFA	1
BP	GO:0150115	cell-substrate junction organization	2021-01-05	102/18866	0.0267448	0.0422439	0.00921974	VEGFA	1
BP	GO:0001823	mesonephros development	2021-01-05	103/18866	0.0270042	0.0423113	0.00923447	VEGFA	1
BP	GO:0002042	cell migration involved in sprouting angiogenesis	2021-01-05	103/18866	0.0270042	0.0423113	0.00923447	VEGFA	1
BP	GO:0008630	intrinsic apoptotic signaling pathway in response to DNA damage	2021-01-05	103/18866	0.0270042	0.0423113	0.00923447	TP53	1
BP	GO:0048661	positive regulation of smooth muscle cell proliferation	2021-01-05	103/18866	0.0270042	0.0423113	0.00923447	IL6	1
BP	GO:0070498	interleukin-1-mediated signaling pathway	2021-01-05	103/18866	0.0270042	0.0423113	0.00923447	IL6	1
BP	GO:1901890	positive regulation of cell junction assembly	2021-01-05	103/18866	0.0270042	0.0423113	0.00923447	VEGFA	1
BP	GO:0002367	cytokine production involved in immune response	2021-01-05	104/18866	0.0272635	0.0424904	0.00927354	IL6	1
BP	GO:0002456	T cell mediated immunity	2021-01-05	104/18866	0.0272635	0.0424904	0.00927354	IL6	1
BP	GO:0007200	phospholipase C-activating G protein-coupled receptor signaling pathway	2021-01-05	104/18866	0.0272635	0.0424904	0.00927354	ESR1	1
BP	GO:0043279	response to alkaloid	2021-01-05	104/18866	0.0272635	0.0424904	0.00927354	CASP3	1
BP	GO:0002824	positive regulation of adaptive immune response based on somatic recombination of immune receptors built from immunoglobulin superfamily domains	2021-01-05	105/18866	0.0275227	0.0426674	0.00931219	IL6	1
BP	GO:0021549	cerebellum development	2021-01-05	105/18866	0.0275227	0.0426674	0.00931219	TP53	1
BP	GO:0048259	regulation of receptor-mediated endocytosis	2021-01-05	105/18866	0.0275227	0.0426674	0.00931219	VEGFA	1
BP	GO:0062014	negative regulation of small molecule metabolic process	2021-01-05	105/18866	0.0275227	0.0426674	0.00931219	TP53	1
BP	GO:0001841	neural tube formation	2021-01-05	106/18866	0.0277819	0.0426741	0.00931364	CASP3	1
BP	GO:0002708	positive regulation of lymphocyte mediated immunity	2021-01-05	106/18866	0.0277819	0.0426741	0.00931364	IL6	1
BP	GO:0032611	interleukin-1 beta production	2021-01-05	106/18866	0.0277819	0.0426741	0.00931364	IL6	1
BP	GO:0046632	alpha-beta T cell differentiation	2021-01-05	106/18866	0.0277819	0.0426741	0.00931364	IL6	1
BP	GO:0071156	regulation of cell cycle arrest	2021-01-05	106/18866	0.0277819	0.0426741	0.00931364	TP53	1
BP	GO:1904029	regulation of cyclin-dependent protein kinase activity	2021-01-05	106/18866	0.0277819	0.0426741	0.00931364	CASP3	1
BP	GO:2000379	positive regulation of reactive oxygen species metabolic process	2021-01-05	106/18866	0.0277819	0.0426741	0.00931364	TP53	1
BP	GO:0030330	DNA damage response, signal transduction by p53 class mediator	2021-01-05	107/18866	0.028041	0.0430157	0.0093882	TP53	1
BP	GO:0044774	mitotic DNA integrity checkpoint	2021-01-05	108/18866	0.0283	0.0433564	0.00946255	TP53	1
BP	GO:0021761	limbic system development	2021-01-05	109/18866	0.0285591	0.0435823	0.00951186	CASP3	1
BP	GO:0098781	ncRNA transcription	2021-01-05	109/18866	0.0285591	0.0435823	0.00951186	TP53	1
BP	GO:2000278	regulation of DNA biosynthetic process	2021-01-05	109/18866	0.0285591	0.0435823	0.00951186	TP53	1
BP	GO:0002821	positive regulation of adaptive immune response	2021-01-05	110/18866	0.028818	0.0438064	0.00956076	IL6	1
BP	GO:0006289	nucleotide-excision repair	2021-01-05	110/18866	0.028818	0.0438064	0.00956076	TP53	1
BP	GO:0072009	nephron epithelium development	2021-01-05	110/18866	0.028818	0.0438064	0.00956076	VEGFA	1
BP	GO:0002526	acute inflammatory response	2021-01-05	111/18866	0.0290769	0.0439718	0.00959686	IL6	1
BP	GO:0032652	regulation of interleukin-1 production	2021-01-05	111/18866	0.0290769	0.0439718	0.00959686	IL6	1
BP	GO:0061387	regulation of extent of cell growth	2021-01-05	111/18866	0.0290769	0.0439718	0.00959686	VEGFA	1
BP	GO:1903008	organelle disassembly	2021-01-05	111/18866	0.0290769	0.0439718	0.00959686	TP53	1
BP	GO:0006275	regulation of DNA replication	2021-01-05	112/18866	0.0293358	0.044249	0.00965737	TP53	1
BP	GO:0046822	regulation of nucleocytoplasmic transport	2021-01-05	112/18866	0.0293358	0.044249	0.00965737	TP53	1
BP	GO:0001938	positive regulation of endothelial cell proliferation	2021-01-05	113/18866	0.0295945	0.0445248	0.00971755	VEGFA	1
BP	GO:0032963	collagen metabolic process	2021-01-05	113/18866	0.0295945	0.0445248	0.00971755	IL6	1
BP	GO:0003279	cardiac septum development	2021-01-05	114/18866	0.0298533	0.0447417	0.0097649	TP53	1
BP	GO:0022037	metencephalon development	2021-01-05	114/18866	0.0298533	0.0447417	0.0097649	TP53	1
BP	GO:0043200	response to amino acid	2021-01-05	114/18866	0.0298533	0.0447417	0.0097649	CASP3	1
BP	GO:0031623	receptor internalization	2021-01-05	115/18866	0.030112	0.0450718	0.00983694	VEGFA	1
BP	GO:0030518	intracellular steroid hormone receptor signaling pathway	2021-01-05	116/18866	0.0303706	0.0453431	0.00989615	ESR1	1
BP	GO:0032392	DNA geometric change	2021-01-05	116/18866	0.0303706	0.0453431	0.00989615	TP53	1
BP	GO:0045446	endothelial cell differentiation	2021-01-05	117/18866	0.0306291	0.0456129	0.00995503	VEGFA	1
BP	GO:1904019	epithelial cell apoptotic process	2021-01-05	117/18866	0.0306291	0.0456129	0.00995503	IL6	1
BP	GO:0007569	cell aging	2021-01-05	118/18866	0.0308877	0.0458813	0.0100136	TP53	1
BP	GO:0050868	negative regulation of T cell activation	2021-01-05	118/18866	0.0308877	0.0458813	0.0100136	CASP3	1
BP	GO:0010822	positive regulation of mitochondrion organization	2021-01-05	119/18866	0.0311461	0.0462066	0.0100846	TP53	1
BP	GO:0010906	regulation of glucose metabolic process	2021-01-05	121/18866	0.0316629	0.0468546	0.010226	TP53	1
BP	GO:0032612	interleukin-1 production	2021-01-05	121/18866	0.0316629	0.0468546	0.010226	IL6	1
BP	GO:0010811	positive regulation of cell-substrate adhesion	2021-01-05	122/18866	0.0319212	0.0470586	0.0102706	VEGFA	1
BP	GO:0021782	glial cell development	2021-01-05	122/18866	0.0319212	0.0470586	0.0102706	IL6	1
BP	GO:0042752	regulation of circadian rhythm	2021-01-05	122/18866	0.0319212	0.0470586	0.0102706	TP53	1
BP	GO:0048675	axon extension	2021-01-05	123/18866	0.0321794	0.0473797	0.0103406	VEGFA	1
BP	GO:0001838	embryonic epithelial tube formation	2021-01-05	125/18866	0.0326957	0.0477798	0.010428	CASP3	1
BP	GO:0001952	regulation of cell-matrix adhesion	2021-01-05	125/18866	0.0326957	0.0477798	0.010428	VEGFA	1
BP	GO:0008637	apoptotic mitochondrial changes	2021-01-05	125/18866	0.0326957	0.0477798	0.010428	TP53	1
BP	GO:0035270	endocrine system development	2021-01-05	125/18866	0.0326957	0.0477798	0.010428	IL6	1
BP	GO:0048593	camera-type eye morphogenesis	2021-01-05	125/18866	0.0326957	0.0477798	0.010428	VEGFA	1
BP	GO:1903578	regulation of ATP metabolic process	2021-01-05	125/18866	0.0326957	0.0477798	0.010428	TP53	1
BP	GO:0055007	cardiac muscle cell differentiation	2021-01-05	126/18866	0.0329538	0.0480371	0.0104841	VEGFA	1
BP	GO:2000134	negative regulation of G1/S transition of mitotic cell cycle	2021-01-05	126/18866	0.0329538	0.0480371	0.0104841	TP53	1
BP	GO:0017015	regulation of transforming growth factor beta receptor signaling pathway	2021-01-05	127/18866	0.0332118	0.0482332	0.0105269	TP53	1
BP	GO:0051053	negative regulation of DNA metabolic process	2021-01-05	127/18866	0.0332118	0.0482332	0.0105269	TP53	1
BP	GO:1905477	positive regulation of protein localization to membrane	2021-01-05	127/18866	0.0332118	0.0482332	0.0105269	TP53	1
BP	GO:0014013	regulation of gliogenesis	2021-01-05	128/18866	0.0334698	0.0485477	0.0105956	IL6	1
BP	GO:0002576	platelet degranulation	2021-01-05	129/18866	0.0337277	0.0487408	0.0106377	VEGFA	1
BP	GO:0071482	cellular response to light stimulus	2021-01-05	129/18866	0.0337277	0.0487408	0.0106377	TP53	1
BP	GO:1903844	regulation of cellular response to transforming growth factor beta stimulus	2021-01-05	129/18866	0.0337277	0.0487408	0.0106377	TP53	1
BP	GO:0003206	cardiac chamber morphogenesis	2021-01-05	131/18866	0.0342433	0.0493643	0.0107738	TP53	1
BP	GO:0045667	regulation of osteoblast differentiation	2021-01-05	131/18866	0.0342433	0.0493643	0.0107738	IL6	1
BP	GO:0010595	positive regulation of endothelial cell migration	2021-01-05	132/18866	0.034501	0.0496138	0.0108282	VEGFA	1
BP	GO:1902807	negative regulation of cell cycle G1/S phase transition	2021-01-05	132/18866	0.034501	0.0496138	0.0108282	TP53	1
BP	GO:0042770	signal transduction in response to DNA damage	2021-01-05	133/18866	0.0347587	0.049801	0.0108691	TP53	1
BP	GO:0072175	epithelial tube formation	2021-01-05	133/18866	0.0347587	0.049801	0.0108691	CASP3	1
BP	GO:0090101	negative regulation of transmembrane receptor protein serine/threonine kinase signaling pathway	2021-01-05	133/18866	0.0347587	0.049801	0.0108691	TP53	1
MF	GO:0001091	RNA polymerase II general transcription initiation factor binding	2021-02-05	19/18352	1.01e-05	0.00076022	0.000117367	TP53/ESR1	2
MF	GO:0005126	cytokine receptor binding	2021-03-05	271/18352	3.12e-05	0.00116835	0.000180377	IL6/VEGFA/CASP3	3
MF	GO:0140296	general transcription initiation factor binding	2021-02-05	44/18352	5.59e-05	0.00139807	0.000215842	TP53/ESR1	2
MF	GO:0001098	basal transcription machinery binding	2021-02-05	72/18352	0.000150637	0.00225955	0.000348843	TP53/ESR1	2
MF	GO:0001099	basal RNA polymerase II transcription machinery binding	2021-02-05	72/18352	0.000150637	0.00225955	0.000348843	TP53/ESR1	2
MF	GO:0002020	protease binding	2021-02-05	137/18352	0.000545148	0.0061855	0.000954955	TP53/CASP3	2
MF	GO:0070851	growth factor receptor binding	2021-02-05	141/18352	0.000577314	0.0061855	0.000954955	IL6/VEGFA	2
MF	GO:0008083	growth factor activity	2021-02-05	162/18352	0.00076104	0.00713475	0.00110151	IL6/VEGFA	2
MF	GO:0005125	cytokine activity	2021-02-05	235/18352	0.00159176	0.0132646	0.00204787	IL6/VEGFA	2
MF	GO:0001094	TFIID-class transcription factor complex binding	2021-01-05	10/18352	0.00272183	0.0180023	0.0027793	TP53	1
MF	GO:0097199	cysteine-type endopeptidase activity involved in apoptotic signaling pathway	2021-01-05	10/18352	0.00272183	0.0180023	0.0027793	CASP3	1
MF	GO:0004861	cyclin-dependent protein serine/threonine kinase inhibitor activity	2021-01-05	12/18352	0.00326548	0.0180023	0.0027793	CASP3	1
MF	GO:0016004	phospholipase activator activity	2021-01-05	12/18352	0.00326548	0.0180023	0.0027793	CASP3	1
MF	GO:0005172	vascular endothelial growth factor receptor binding	2021-01-05	14/18352	0.0038089	0.0180023	0.0027793	VEGFA	1
MF	GO:0060229	lipase activator activity	2021-01-05	14/18352	0.0038089	0.0180023	0.0027793	CASP3	1
MF	GO:0005161	platelet-derived growth factor receptor binding	2021-01-05	15/18352	0.00408052	0.0180023	0.0027793	VEGFA	1
MF	GO:0097153	cysteine-type endopeptidase activity involved in apoptotic process	2021-01-05	15/18352	0.00408052	0.0180023	0.0027793	CASP3	1
MF	GO:0005123	death receptor binding	2021-01-05	20/18352	0.00543773	0.0218805	0.00337804	CASP3	1
MF	GO:0048018	receptor ligand activity	2021-02-05	487/18352	0.00666364	0.0218805	0.00337804	IL6/VEGFA	2
MF	GO:0004190	aspartic-type endopeptidase activity	2021-01-05	25/18352	0.00679345	0.0218805	0.00337804	CASP3	1
MF	GO:0030546	signaling receptor activator activity	2021-02-05	492/18352	0.00679756	0.0218805	0.00337804	IL6/VEGFA	2
MF	GO:0003707	steroid hormone receptor activity	2021-01-05	26/18352	0.00706442	0.0218805	0.00337804	ESR1	1
MF	GO:0017025	TBP-class protein binding	2021-01-05	26/18352	0.00706442	0.0218805	0.00337804	ESR1	1
MF	GO:0070001	aspartic-type peptidase activity	2021-01-05	26/18352	0.00706442	0.0218805	0.00337804	CASP3	1
MF	GO:0001968	fibronectin binding	2021-01-05	27/18352	0.00733533	0.0218805	0.00337804	VEGFA	1
MF	GO:0035035	histone acetyltransferase binding	2021-01-05	28/18352	0.00760618	0.0218805	0.00337804	TP53	1
MF	GO:0001223	transcription coactivator binding	2021-01-05	29/18352	0.00787697	0.0218805	0.00337804	ESR1	1
MF	GO:0030291	protein serine/threonine kinase inhibitor activity	2021-01-05	31/18352	0.00841838	0.0224715	0.00346929	CASP3	1
MF	GO:0051721	protein phosphatase 2A binding	2021-01-05	32/18352	0.00868899	0.0224715	0.00346929	TP53	1
MF	GO:0097718	disordered domain specific binding	2021-01-05	36/18352	0.00977085	0.0242932	0.00375052	TP53	1
MF	GO:0042056	chemoattractant activity	2021-01-05	37/18352	0.0100412	0.0242932	0.00375052	VEGFA	1
MF	GO:0030331	estrogen receptor binding	2021-01-05	42/18352	0.0113919	0.0266997	0.00412206	ESR1	1
MF	GO:0001046	core promoter sequence-specific DNA binding	2021-01-05	46/18352	0.0124714	0.027807	0.004293	TP53	1
MF	GO:0032813	tumor necrosis factor receptor superfamily binding	2021-01-05	48/18352	0.0130108	0.027807	0.004293	CASP3	1
MF	GO:0016538	cyclin-dependent protein serine/threonine kinase regulator activity	2021-01-05	50/18352	0.0135499	0.027807	0.004293	CASP3	1
MF	GO:0001221	transcription cofactor binding	2021-01-05	51/18352	0.0138194	0.027807	0.004293	ESR1	1
MF	GO:0004879	nuclear receptor activity	2021-01-05	52/18352	0.0140889	0.027807	0.004293	ESR1	1
MF	GO:0098531	ligand-activated transcription factor activity	2021-01-05	52/18352	0.0140889	0.027807	0.004293	ESR1	1
MF	GO:0001085	RNA polymerase II transcription factor binding	2021-01-05	56/18352	0.015166	0.0280433	0.00432949	TP53	1
MF	GO:0043621	protein self-association	2021-01-05	57/18352	0.0154351	0.0280433	0.00432949	TP53	1
MF	GO:0050840	extracellular matrix binding	2021-01-05	57/18352	0.0154351	0.0280433	0.00432949	VEGFA	1
MF	GO:1990841	promoter-specific chromatin binding	2021-01-05	58/18352	0.0157042	0.0280433	0.00432949	TP53	1
MF	GO:0005507	copper ion binding	2021-01-05	60/18352	0.0162422	0.0283294	0.00437367	TP53	1
MF	GO:0004860	protein kinase inhibitor activity	2021-01-05	65/18352	0.0175861	0.0297579	0.0045942	CASP3	1
MF	GO:0002039	p53 binding	2021-01-05	66/18352	0.0178548	0.0297579	0.0045942	TP53	1
MF	GO:0019210	kinase inhibitor activity	2021-01-05	69/18352	0.0186602	0.0304243	0.00469708	CASP3	1
MF	GO:0030971	receptor tyrosine kinase binding	2021-01-05	72/18352	0.0194652	0.0310615	0.00479545	TP53	1
MF	GO:0035258	steroid hormone receptor binding	2021-01-05	81/18352	0.0218769	0.0341826	0.00527731	ESR1	1
MF	GO:0008013	beta-catenin binding	2021-01-05	85/18352	0.0229472	0.0351232	0.00542254	ESR1	1
MF	GO:0051117	ATPase binding	2021-01-05	88/18352	0.0237493	0.035624	0.00549984	ESR1	1
MF	GO:1990782	protein tyrosine kinase binding	2021-01-05	98/18352	0.0264193	0.0388519	0.00599819	TP53	1
MF	GO:0016922	nuclear receptor binding	2021-01-05	101/18352	0.0272191	0.0392584	0.00606094	ESR1	1
MF	GO:0051087	chaperone binding	2021-01-05	104/18352	0.0280185	0.0392963	0.00606679	TP53	1
MF	GO:0005496	steroid binding	2021-01-05	106/18352	0.0285511	0.0392963	0.00606679	ESR1	1
MF	GO:0047485	protein N-terminus binding	2021-01-05	107/18352	0.0288173	0.0392963	0.00606679	TP53	1
MF	GO:0004197	cysteine-type endopeptidase activity	2021-01-05	114/18352	0.0306791	0.0407019	0.00628381	CASP3	1
MF	GO:0042826	histone deacetylase binding	2021-01-05	115/18352	0.0309448	0.0407019	0.00628381	TP53	1
MF	GO:0003730	mRNA 3'-UTR binding	2021-01-05	117/18352	0.0314762	0.0407019	0.00628381	TP53	1
MF	GO:0008234	cysteine-type peptidase activity	2021-01-05	139/18352	0.0373052	0.0474219	0.00732127	CASP3	1
MF	GO:0035257	nuclear hormone receptor binding	2021-01-05	144/18352	0.0386261	0.0482826	0.00745415	ESR1	1
MF	GO:0019903	protein phosphatase binding	2021-01-05	149/18352	0.0399455	0.0491133	0.0075824	TP53	1
