# Supplementary material for: Therapeutic targets and signaling pathways of active components of QiLing decoction against castration-resistant prostate cancer based on network pharmacology
Source: PeerJ. 2022 Jun 27;10:e13481. doi: 10.7717/peerj.13481 (PMC9245566; doi:10.7717/peerj.13481)
Supplement: Supplemental Information 3 — KEGG pathway enrichment were used to explore the signaling pathways of potential targets of active components of QLD. [file peerj-10-13481-s003.xls]

## Sheet: Sheet1
id	Description	GeneRatio	BgRatio	pvalue	p.adjust	qvalue	Count
hsa05163	Human cytomegalovirus infection	2021-05-05	225/8102	1.58e-08	1.8e-06	5.49e-07	5
hsa05219	Bladder cancer	2021-03-05	41/8102	1.19e-06	5.56e-05	1.7e-05	3
hsa05167	Kaposi sarcoma-associated herpesvirus infection	2021-04-05	193/8102	1.53e-06	5.56e-05	1.7e-05	4
hsa05205	Proteoglycans in cancer	2021-04-05	205/8102	1.95e-06	5.56e-05	1.7e-05	4
hsa05212	Pancreatic cancer	2021-03-05	76/8102	7.83e-06	0.000143308	4.37e-05	3
hsa04010	MAPK signaling pathway	2021-04-05	294/8102	8.26e-06	0.000143308	4.37e-05	4
hsa01521	EGFR tyrosine kinase inhibitor resistance	2021-03-05	79/8102	8.8e-06	0.000143308	4.37e-05	3
hsa05206	MicroRNAs in cancer	2021-04-05	310/8102	1.02e-05	0.00014406	4.39e-05	4
hsa05210	Colorectal cancer	2021-03-05	86/8102	1.14e-05	0.00014406	4.39e-05	3
hsa05165	Human papillomavirus infection	2021-04-05	331/8102	1.32e-05	0.000151	4.6e-05	4
hsa04151	PI3K-Akt signaling pathway	2021-04-05	354/8102	1.73e-05	0.000170268	5.19e-05	4
hsa04933	AGE-RAGE signaling pathway in diabetic complications	2021-03-05	100/8102	1.79e-05	0.000170268	5.19e-05	3
hsa04066	HIF-1 signaling pathway	2021-03-05	109/8102	2.32e-05	0.000203711	6.21e-05	3
hsa05162	Measles	2021-03-05	139/8102	4.82e-05	0.000392438	0.000119579	3
hsa05160	Hepatitis C	2021-03-05	157/8102	6.94e-05	0.000527331	0.000160682	3
hsa05161	Hepatitis B	2021-03-05	162/8102	7.62e-05	0.00054294	0.000165439	3
hsa05169	Epstein-Barr virus infection	2021-03-05	202/8102	0.000147169	0.000986895	0.000300716	3
hsa05134	Legionellosis	2021-02-05	57/8102	0.00047976	0.00298062	0.000908223	2
hsa05213	Endometrial cancer	2021-02-05	58/8102	0.000496771	0.00298062	0.000908223	2
hsa05120	Epithelial cell signaling in Helicobacter pylori infection	2021-02-05	70/8102	0.000723616	0.00358805	0.00109331	2
hsa05230	Central carbon metabolism in cancer	2021-02-05	70/8102	0.000723616	0.00358805	0.00109331	2
hsa05218	Melanoma	2021-02-05	72/8102	0.000765485	0.00358805	0.00109331	2
hsa05223	Non-small cell lung cancer	2021-02-05	72/8102	0.000765485	0.00358805	0.00109331	2
hsa01524	Platinum drug resistance	2021-02-05	73/8102	0.000786853	0.00358805	0.00109331	2
hsa04115	p53 signaling pathway	2021-02-05	73/8102	0.000786853	0.00358805	0.00109331	2
hsa05214	Glioma	2021-02-05	75/8102	0.000830454	0.00360024	0.00109702	2
hsa05133	Pertussis	2021-02-05	76/8102	0.000852687	0.00360024	0.00109702	2
hsa05222	Small cell lung cancer	2021-02-05	92/8102	0.00124744	0.00494731	0.00150749	2
hsa05323	Rheumatoid arthritis	2021-02-05	93/8102	0.00127454	0.00494731	0.00150749	2
hsa04657	IL-17 signaling pathway	2021-02-05	94/8102	0.00130192	0.00494731	0.00150749	2
hsa05215	Prostate cancer	2021-02-05	97/8102	0.00138578	0.00503844	0.00153526	2
hsa01522	Endocrine resistance	2021-02-05	98/8102	0.0014143	0.00503844	0.00153526	2
hsa05146	Amoebiasis	2021-02-05	102/8102	0.0015312	0.00528962	0.00161179	2
hsa04668	TNF signaling pathway	2021-02-05	112/8102	0.0018432	0.00618015	0.00188315	2
hsa05168	Herpes simplex virus 1 infection	2021-03-05	498/8102	0.00210261	0.00684852	0.00208681	3
hsa04926	Relaxin signaling pathway	2021-02-05	129/8102	0.00243779	0.00771965	0.00235225	2
hsa04068	FoxO signaling pathway	2021-02-05	131/8102	0.00251301	0.00774279	0.0023593	2
hsa04210	Apoptosis	2021-02-05	136/8102	0.0027059	0.0081177	0.00247354	2
hsa05418	Fluid shear stress and atherosclerosis	2021-02-05	139/8102	0.00282494	0.0082575	0.00251614	2
hsa05224	Breast cancer	2021-02-05	147/8102	0.00315442	0.00890959	0.00271483	2
hsa05226	Gastric cancer	2021-02-05	149/8102	0.00323952	0.00890959	0.00271483	2
hsa04932	Non-alcoholic fatty liver disease	2021-02-05	150/8102	0.00328248	0.00890959	0.00271483	2
hsa04218	Cellular senescence	2021-02-05	156/8102	0.00354594	0.00940086	0.00286453	2
hsa04630	JAK-STAT signaling pathway	2021-02-05	162/8102	0.00381914	0.00989506	0.00301512	2
hsa05225	Hepatocellular carcinoma	2021-02-05	168/8102	0.00410205	0.0103919	0.0031665	2
hsa05164	Influenza A	2021-02-05	172/8102	0.00429602	0.0106467	0.00324413	2
hsa05152	Tuberculosis	2021-02-05	180/8102	0.00469678	0.0113922	0.0034713	2
hsa05202	Transcriptional misregulation in cancer	2021-02-05	192/8102	0.00532976	0.0126582	0.00385706	2
hsa05130	Pathogenic Escherichia coli infection	2021-02-05	197/8102	0.0056047	0.0130395	0.00397326	2
hsa04510	Focal adhesion	2021-02-05	201/8102	0.00582938	0.013291	0.00404988	2
hsa05203	Viral carcinogenesis	2021-02-05	204/8102	0.00600063	0.0134132	0.00408711	2
hsa04015	Rap1 signaling pathway	2021-02-05	210/8102	0.00635016	0.0139215	0.00424201	2
hsa05166	Human T-cell leukemia virus 1 infection	2021-02-05	219/8102	0.00689194	0.0148242	0.00451706	2
hsa04014	Ras signaling pathway	2021-02-05	232/8102	0.0077113	0.0159834	0.00487029	2
hsa05171	Coronavirus disease - COVID-19	2021-02-05	232/8102	0.0077113	0.0159834	0.00487029	2
hsa04020	Calcium signaling pathway	2021-02-05	240/8102	0.00823695	0.0167681	0.00510938	2
hsa05131	Shigellosis	2021-02-05	246/8102	0.00864182	0.0170955	0.00520915	2
hsa05012	Parkinson disease	2021-02-05	249/8102	0.00884766	0.0170955	0.00520915	2
hsa05132	Salmonella infection	2021-02-05	249/8102	0.00884766	0.0170955	0.00520915	2
hsa05020	Prion disease	2021-02-05	273/8102	0.0105753	0.0200931	0.00612256	2
hsa05016	Huntington disease	2021-02-05	306/8102	0.013182	0.0246352	0.00750657	2
hsa05014	Amyotrophic lateral sclerosis	2021-02-05	364/8102	0.0183916	0.0338168	0.0103043	2
hsa05010	Alzheimer disease	2021-02-05	369/8102	0.0188772	0.0338257	0.010307	2
hsa01523	Antifolate resistance	2021-01-05	31/8102	0.0189899	0.0338257	0.010307	1
hsa04215	Apoptosis - multiple species	2021-01-05	32/8102	0.0195976	0.0343712	0.0104732	1
hsa05143	African trypanosomiasis	2021-01-05	37/8102	0.0226318	0.0385078	0.0117337	1
hsa05216	Thyroid cancer	2021-01-05	37/8102	0.0226318	0.0385078	0.0117337	1
hsa04216	Ferroptosis	2021-01-05	41/8102	0.0250537	0.0420018	0.0127983	1
hsa05332	Graft-versus-host disease	2021-01-05	42/8102	0.0256585	0.0423922	0.0129173	1
hsa04672	Intestinal immune network for IgA production	2021-01-05	49/8102	0.0298832	0.0482687	0.0147079	1
hsa05022	Pathways of neurodegeneration - multiple diseases	2021-02-05	475/8102	0.0304698	0.0482687	0.0147079	2
hsa05144	Malaria	2021-01-05	50/8102	0.0304855	0.0482687	0.0147079	1
