# Supplementary material for: Therapeutic targets and signaling pathways of active components of QiLing decoction against castration-resistant prostate cancer based on network pharmacology
Source: PeerJ. 2022 Jun 27;10:e13481. doi: 10.7717/peerj.13481 (PMC9245566; doi:10.7717/peerj.13481)
Supplement: Supplemental Information 4 [file peerj-10-13481-s004.xlsx]

## Sheet: Sheet1
	CONTROL					QL					DOC					DOC+QL
35d	1	2	3	4	5	1	2	3	4	5	1	2	3	4	5	1	2	3	4	5
major diameter	18.5	18.3	18	18.6	17.9	14.5	14.8	14.9	15.1	15.5	12	12.3	12	11.9	11.8	10	10.1	10.1	10	9.8
minor diameter	14.5	14.1	14.4	14.5	13.8	10.5	10.8	10.9	11.1	11.3	10.5	10.6	10.5	10.4	10.4	8	8.1	8.1	8	7.8
volume	1944.81	1819.11	1866.24	1955.33	1704.44	799.312	863.136	885.135	930.236	989.597	661.5	691.014	661.5	643.552	638.144	320	331.33	331.33	320	298.116
30d
major diameter	14.5	14	14.2	14.5	13.9	11.5	11.8	12	12.3	12.5	9.5	9.7	9.5	9.4	9.4	8	8.1	8.1	8	7.8
minor diameter	11.5	11.2	11.3	11.7	11.1	8.5	8.7	9	9.2	9.4	8.5	8.6	8.5	8.4	8.4	6.5	6.6	6.6	6.5	6.3
volume	958.812	878.08	906.599	992.452	856.309	415.438	446.571	486	520.536	552.25	343.188	358.706	343.188	331.632	331.632	169	176.418	176.418	169	154.791
25d
major diameter	11.5	11.2	11.5	11.6	11	10	10.2	10.5	10.7	10.9	7.5	7.7	7.5	7.4	7.4	6.5	6.6	6.6	6.5	6.3
minor diameter	9.5	9.3	9.2	9.6	8.9	7	7.2	7.5	7.7	7.9	6.5	6.6	6.5	6.4	6.4	5.5	5.6	5.6	5.5	5.3
volume	518.938	484.344	486.68	534.528	435.655	245	264.384	295.312	317.202	340.135	158.438	167.706	158.438	151.552	151.552	98.3125	103.488	103.488	98.3125	88.4835
20d
major diameter	9.5	9.2	9.3	9.6	8.9	8	8.2	8.4	8.6	8.8	6	6.1	6	5.9	5.9	5.5	5.6	5.55	5	5.3
minor diameter	8.5	8.2	8.3	8.6	7.9	6	6.2	6.4	6.6	6.8	5.5	5.6	5.5	5.4	5.4	5	5.1	5.05	5	4.8
volume	343.188	309.304	320.339	355.008	277.724	144	157.604	172.032	187.308	203.456	90.75	95.648	90.75	86.022	86.022	68.75	72.828	70.7694	62.5	61.056
15d
major diameter	8	7.9	7.7	8.1	7.5	7	7.2	7.4	7.6	7.8	5.5	5.6	5.5	5.4	5.4	5	5.1	5.05	5	4.8
minor diameter	7	6.7	6.8	7.2	6.5	5.5	5.7	5.9	6.1	6.3	5	5.1	5	4.9	4.9	4.6	4.7	4.65	4.6	4.4
volume	196	177.315	178.024	209.952	158.438	105.875	116.964	128.797	141.398	154.791	68.75	72.828	68.75	64.827	64.827	52.9	56.3295	54.5968	52.9	46.464
10d
major diameter	6.5	6.2	6.3	6.6	5.9	6	6.1	6.3	6.4	6.6	5	5.1	5	4.9	4.9	4.5	4.5	4.45	4.5	4.4
minor diameter	5.5	5.2	5.3	5.4	5	4.8	4.9	5	5.1	5.2	4.8	4.9	4.8	4.7	4.7	4.3	4.3	4.25	4.3	4.25
volume	98.3125	83.824	88.4835	96.228	73.75	69.12	73.2305	78.75	83.232	89.232	57.6	61.2255	57.6	54.1205	54.1205	41.6025	41.6025	40.1891	41.6025	39.7375
5d
major diameter	5	5.1	5.2	5.3	4.9	5	5.1	5.2	5.3	5.4	5	5.1	5	4.95	4.9	5	5	5.05	5	4.95
minor diameter	4.5	4.2	4.3	4.5	4	4.5	4.6	4.7	4.8	4.9	4.5	4.6	4.5	4.45	4.4	4.5	4.5	4.5	4.5	4.45
volume	50.625	44.982	48.074	53.6625	39.2	50.625	53.958	57.434	61.056	64.827	50.625	53.958	50.625	49.0112	47.432	50.625	50.625	51.1313	50.625	49.0112
	CONTROL	QL	DOC	DOC+QL
weight	0.94002	0.394722	0.371212	0.174292
	0.866244	0.441376	0.327592	0.211771
	0.864416	0.433491	0.349832	0.194139
	0.926969	0.467959	0.291224	0.352617
	0.865612	0.485798	0.290065	0.16562
